# Supplementary material
Source: publisher figshare collection journal article supplement (https://rs.figshare.com/ndownloader/files/20105255)
Supplement: Supplementary file 1 [file 20105255]

## Sheet: Lens
WAVELENGTH (nm)	Brachycephalus ephippium	Hylodes phyllodes	Atelopus varius	Cochranella granulosa	Craugastor fitzingeri	Dendropsophus microcephalus	Elachistocleis panamensis	Leptodactylus insularum	Oophaga pumilio	Bombina orientalis	Ischnocnema parva	Pithecopus hypochondrialis	Xenohyla truncata	Bokermannohyla astartea	Adelphobates castaneoticus	Hylodes asper	Rhinella icterica	Leptodactylus fragilis	Bokermannohyla hylax	Boana geographica	Leptodactylus tapiti	Agalychnis callidryas	Boana rosenbergi	Dendrobates auratus	Engystomops pustulosus	Allobates femoralis	Thoropa taophora	Hylodes pipilans	Dendropsophus ebraccatus	Scinax ruber	Teratohyla spinosa	Physalaemus cuvieri
280										0.421936917451443
281										0.445952584422153
282										0.469932615761079
283										0.493871523151828
284										0.517762502213627
285										0.541596908856533
286										0.565363386903043
287										0.58904631874717
288										0.61263045355008
289										0.636113002868928
290										0.659445051792088
291										0.682546712792413
292										0.705374096401022
293										0.727588024879693
294										0.748036027878423
295										0.765803778141546
296										0.781084303770669
297										0.794106566251376
298										0.805346459542243
299										0.815606049740904
300		0.127811663687802	0.0846625589101308	0.0855064754946255	0.106599684949406	0.0669837805103667	0.0535876572882501	0.0264116421762117	0.0228903221369611	0.826134183306357								0.0734132180567102				0.13471845254595		0.0408857904024555	0.189392962870265				0.0578680961158783	0.0479129313350306	0.100721551209719
301		0.0640142221892164	0.0830622218084806	0.0836843854045033	0.100512290052769	0.0649695908552744	0.0579000015231372	0.0264560206036394	0.0232737243116791	0.837872378496092								0.0717593648203098				0.130359890884945		0.0415805518222543	0.169454801748793				0.0583035089707983	0.0487709829797505	0.098913988574221
302		0.0593804672045281	0.0776268572538452	0.0812488963144734	0.0955289582057789	0.0624385431570461	0.063518392328825	0.0262079805256503	0.0228739949647506	0.850348021528431								0.0690826532514795				0.124998309760964		0.043017233875974	0.155600826641094				0.0572502907010913	0.0483524891843009	0.0958517996613835
303		0.0603949460880965	0.0752649193408961	0.0790075824122534	0.0926250591616492	0.0605375607553642	0.0705594409219729	0.0258022179823555	0.0243901342221652	0.862393907012273	0.192782018574457							0.0665303440191786				0.119962973114736		0.0454318623047202	0.146012111625737				0.0562676645686048	0.0475049390745466	0.0933944830566651
304		0.0655606382120206	0.0742263603092716	0.0771607946559749	0.0911196982487252	0.0591832288673823	0.0793248434153963	0.0254027310155892	0.0272300803491074	0.873561137698047	0.193715056961355							0.064300619090091				0.115513354551472		0.0488988328473111	0.138972580370135				0.0556387224580322	0.0466526449712519	0.0913379117467251
305		0.0727448354714543	0.0752383887531023	0.0756816260416965	0.0912814592141036	0.0584392570691643	0.0899942899372602	0.0250097693377127	0.0311855103782822	0.884481789832251	0.200162936921667							0.0624077330541353				0.112008861438205		0.0532264890421639	0.135313348039236				0.0552972537973406	0.0457935453425977	0.0898156117232657
306		0.0722430413203069	0.0760845245453108	0.0741727979918621	0.0908279233959341	0.0575204907301362	0.103022679835686	0.0246841469468117	0.0345464675873018	0.8956222666067	0.202750078269487							0.0605521444840098				0.108447095954585		0.0584936727421559	0.130608759197063				0.0550469300644847	0.0451585476049405	0.0882820694108057
307		0.080993692628647	0.0779367219865287	0.0728429881992639	0.0918020104040098	0.0569429323802635	0.118664294885941	0.0243382845732302	0.038642935550519	0.906403836490014	0.208337956869325							0.058782176663531				0.105238559034717		0.0648010197447016	0.129277619619975				0.0548446885227494	0.0443670024518907	0.0869386412183286
308		0.0898125938713853	0.0819366570009111	0.0718331611841759	0.0942594152064267	0.0568190243801857	0.137266530387273	0.0239772912387557	0.043839362551858	0.916794475333645	0.220202578698692							0.0572759471768863				0.102804581320611		0.0720823587695174	0.131213546409807				0.0548771844877812	0.0435766955120172	0.0860378059078124
309		0.0980202835117329	0.0881642433215221	0.0712230707988526	0.0983333240366075	0.057184297520369	0.158724250787819	0.0236520467635567	0.0500981991062385	0.927061693115996	0.235860190028519						0.14158407193245	0.0560984506576867				0.101109267760283		0.0805317274596064	0.136293871281448				0.0552953547465116	0.0428676204955009	0.085640067397619
310		0.106724283108917	0.0889854095412911	0.0710422698775905	0.103972873287382	0.0580079879117333	0.182887884792063	0.0233513591414769	0.0571314685793141	0.936513318554524	0.267689119717143						0.124019692943073	0.0552919038536245				0.10024823650438		0.0900338761399146	0.144433281889577		0.141551473140739		0.0561119506971091	0.042299413825726	0.0856559604567444
311		0.115431560321806	0.0951058774345565	0.0712656617785834	0.111100049767752	0.0591824350752601	0.209622893666417	0.0231039293093146	0.064757070933747	0.943406856910228	0.277891529565406						0.123258112498784	0.0548061988926232				0.100187541780622		0.100405661404499	0.155585767457788		0.140262413710115		0.0572626747721644	0.0418825972241313	0.0860651322362367
312		0.124261258299687	0.106229657765788	0.0718912987523399	0.119920365845212	0.0607087237395485	0.238781759202598	0.0229114652820669	0.0728783626449848	0.946797601820557	0.298893051375121						0.127670178669286	0.0546232306117953				0.100885220970521		0.111384879276318	0.170191447590487		0.138596306796808		0.0587242199599637	0.0415702658515653	0.0868894936495671
313		0.13248863262272	0.119927037907687	0.0728802497241642	0.13034127224857	0.0625344188298118	0.270128479077802	0.0227368590334025	0.0813126603075572	0.947482029111474	0.323672292062834						0.135277929993894	0.0547284026982114				0.102337578868554		0.122873761907239	0.18812624354507		0.140159356397182		0.0604311368412152	0.0413755971392029	0.0880761261746016
314		0.140004321947364	0.135517046113671	0.0742061585075187	0.142318210311814	0.0645989448598061	0.303288249718887	0.0225780175192426	0.089898845317638	0.946816609981497	0.34565697012745						0.144178005275624	0.0551252377627947				0.104495993357169		0.134567674458503	0.209253929838343		0.142283207726702		0.0623726962168749	0.0412993313175723	0.0895480095023542
315		0.147377016170661	0.152993493248391	0.075857548064603	0.155705170973678	0.0667931426073689	0.338184144438875	0.0224526838819082	0.0986373755433617	0.945824472368872	0.365078969374953						0.154316501022517	0.055758421333501				0.107207490833895		0.146323726369855	0.233362696604201		0.14615989050159		0.0644961021962968	0.0413317090627094	0.0912411712255186
316		0.1543073483076	0.170631286382538	0.0777666357765232	0.170273572279267	0.0690390806702216	0.374375048660666	0.02236657505214	0.107439713213633	0.945610115463149	0.384288031770062						0.163040281728677	0.0565687425292579				0.110396626100281		0.157983354897208	0.259976764584982		0.149194663760051		0.0667064858335988	0.0414420947975806	0.0930557829544862
317		0.160347310452247	0.189994601453047	0.0798583443703209	0.185758916614941	0.0712561891346569	0.411003845352732	0.0223124328164525	0.116018753633476	0.947049858964379	0.404579597148386						0.173229533713603	0.0575179004528025				0.113984855908753		0.169312763324884	0.288648754087679		0.152992451768261		0.0689135285650439	0.0416026148482257	0.0948999201604465
318		0.166526596183673	0.210501933328132	0.0820724709922447	0.201856327001445	0.0733404140680447	0.447438900085566	0.0222892130576599	0.124094480863462	0.950385854419264	0.423532989848526						0.184211270249779	0.058571734143669				0.117809987556946		0.180166242986215	0.318928128128929		0.15813252008751		0.0710371537706384	0.0417814338856682	0.0967116221791444
319		0.17199304004325	0.231910631876338	0.0843037846847871	0.218303980551744	0.0752140443937241	0.48310940465792	0.0223054852536081	0.131380479764064	0.954817490706091	0.441415680718072						0.195696036148984	0.0596795464130865				0.121743324930505		0.190421036556405	0.350360990206495		0.164225866062899		0.0729944279351055	0.0419299793990693	0.0984141771540877
320	0.253273112164904	0.176755550649348	0.253982041647421	0.0864458827947068	0.234804989083175	0.0768137847837671	0.518009046635253	0.0223427106452848	0.137761152871252	0.959148750692441	0.456610734339803	0.137063741055652					0.207294637763005	0.060782342097986				0.125615312648307		0.199584037143304	0.3823671442351		0.151032017311881		0.0746725367339596	0.0420150327846829	0.0999404975291458
321	0.270944299501125	0.180060239347714	0.276677499213282	0.0884439595849041	0.251049469677795	0.0780885098794578	0.551572209606195	0.0224117048104446	0.143298619089104	0.962708740146631	0.468912468950752	0.134332633922022					0.218914427107674	0.061831422274773				0.129306613208759		0.207515327908904	0.414584282546127		0.169084210129256		0.0760276321302701	0.0420133637044674	0.10121197403467
322	0.278619513325153	0.182839298780271	0.299846920803956	0.0902367946697605	0.266723655016297	0.0789901442514021	0.583426234894656	0.0225014728859561	0.147873019931956	0.965287921171567	0.480214484978688	0.133524290759002					0.230431645573436	0.0628059221918565				0.132724531566406		0.214255060189516	0.446487499067372		0.176625039682015		0.0769985858241159	0.0419071467936872	0.102175448826784
323	0.284176449038403	0.185008214838097	0.32319102078607	0.0917540120955928	0.281525697086273	0.0794735141869281	0.612861652630474	0.0226009113229915	0.151507171478744	0.966599639007729	0.490321801554387	0.132176427535163					0.241928151665837	0.0636857548318969				0.135825995953212		0.219808672153805	0.477525430423171		0.185017135788106		0.0775565226315348	0.0416798803029879	0.102803022753937
324	0.289150846109325	0.186533341207497	0.34642850167783	0.0929878952351907	0.295255728086201	0.0795134389694663	0.639839512102466	0.0227271788861871	0.154286431824555	0.96663030435293	0.499524318475412	0.130937896981017					0.252925663989945	0.06445644622873				0.138499064326391		0.224076124336073	0.507334289911475		0.194191746075153		0.0777121496382367	0.041319357575289	0.103101006012224
325	0.295339036754605	0.186791303206524	0.369453502374956	0.0939284440127512	0.307782103667743	0.0791238080489716	0.664375675522541	0.0228941297128893	0.15622214133224	0.965669388464256	0.508361943448315	0.130498081225385					0.263581472330192	0.0651315299182704				0.140644796585034		0.227025112277777	0.535559354656342		0.204720418275018		0.0774820972110918	0.0408368654020864	0.103121710299263
326	0.30281504663149	0.18591349256501	0.392064860428193	0.0945552351439462	0.319009926326375	0.0783452868056887	0.68615311717854	0.0230762525484645	0.157164572385064	0.963698111764566	0.515870735368624	0.129597180015146					0.27375463193043	0.0657189581227302				0.142282201447749		0.228671798247027	0.561963707782452		0.216523209385432		0.0768912299806201	0.0402186447280614	0.102882091333056
327	0.309106591575379	0.184175044271821	0.414289896104856	0.0949122259633123	0.328908096251953	0.0772149377988828	0.705611297742903	0.0232453957424345	0.157132034853215	0.960280016131987	0.521844290129325	0.128721647257985					0.283296764634925	0.066258352328746				0.143345294986957		0.229120172517441	0.586576549645778		0.227572837363536		0.0760107663105046	0.0394994489497303	0.102419018316137
328	0.316315600309175	0.18170993397176	0.436200866716561	0.095027655132718	0.337510661953439	0.0757755911859243	0.722984156350577	0.0234064449805735	0.156201488655077	0.955307658550191	0.526462370393588	0.128466112520434					0.292235925766694	0.0667806847637245				0.143824063657898		0.228495882704515	0.609328629018459		0.239465590550638		0.0749060591059537	0.0387058977124892	0.101782201951253
329	0.323938044988815	0.178403264041004	0.457663477871053	0.0949229791992283	0.344883873934325	0.0740651446082269	0.738342784607708	0.0235427163559837	0.154486022838344	0.949312105415616	0.530643933475453	0.127743081763844					0.300705846535049	0.0673006705900086				0.143768779345082		0.226847204799995	0.630218964306989		0.253003823507119		0.0736225056014239	0.0378434795023396	0.101012882525539
330	0.325979702371128	0.174133257961458	0.478799464306383	0.0946580872160999	0.351114948975556	0.072156918807755	0.751722104347877	0.0236588870434856	0.152223043126106	0.943112610430354	0.533946245855626	0.130468968261756					0.308914357107352	0.0678568823249112	0.0442162654791864		0.112947213511345	0.143207202857747		0.224192509347045	0.649302335393493		0.267509475422676		0.0722155376370646	0.0369508558497252	0.100186884513178
331	0.338672333957194	0.169831704566171	0.499381396482589	0.0942902077764527	0.356361849138055	0.0701116802410682	0.763158676319069	0.0237709826187769	0.14942249993495	0.937129573962463	0.537923244815088	0.128027803755042					0.316697666528044	0.0684951410163703	0.0448195027507973		0.110868705098997	0.142168046842881		0.220885253079578	0.666822549190782		0.282490747127976		0.0707338109035759	0.0360436078906309	0.0993564042358877
332	0.35558572501847	0.165404169729499	0.519464281966467	0.0938337171810574	0.360780189881584	0.06797281059787	0.773146268379909	0.0238812304549891	0.146041949546038	0.93189825475597	0.54231815027927	0.127740013536977					0.324202005262225	0.0692339202226666	0.0444746233866847		0.109547215229847	0.140724470044907		0.217067475088558	0.682784061219572		0.29839880887977		0.0692022607184998	0.0351342200999205	0.098573340933736
333	0.374977638022492	0.160377512989185	0.539108029932353	0.0933284784936929	0.364535093851484	0.0657951147130529	0.781847658145622	0.024000014841632	0.14226226082626	0.928577715922268	0.546378370209357	0.127730799924658					0.331402267182718	0.0700916275952285	0.0439396632934512		0.108798799901007	0.138948078565115		0.212687336205529	0.69744699439033		0.315073233700053		0.0676696028453495	0.0342332968243612	0.0978618116355635
334	0.395341443523478	0.155354347651403	0.558404628681819	0.0928214676923234	0.367801122385622	0.0636282214559156	0.790026444632523	0.0241216807866985	0.138163901569034	0.927533018038478	0.550059278589701	0.127922588694678					0.338311790682961	0.0710951560467291	0.0432611478370604		0.108047653615208	0.136893983328713		0.20789952317482	0.710964073672457		0.332979791806556		0.0661539220919855	0.0333569890606272	0.0972444968069975
335	0.41770494405827	0.150099876895835	0.577423471539943	0.0923209098757938	0.37070648305493	0.0615051820620033	0.797507200413503	0.0242697260376545	0.133655020217426	0.92831758951572	0.553792984306238	0.128207151543627					0.345005379174094	0.0722486012599785	0.0425577501918684		0.107650387452582	0.134668336412285		0.202692238311614	0.723532913166562		0.350658099937655		0.0646638760389424	0.0325049736007997	0.0967351828834603
336	0.439103052934951	0.14482447850723	0.596026452607493	0.0918729848771496	0.37335102847203	0.059459329321816	0.804428652094783	0.0244341253658443	0.128796145955931	0.930681670712264	0.55634743238583	0.128223644719215					0.351544388737769	0.0735615543626661	0.0420092914261288		0.107172904947294	0.132387766067662		0.197215840098707	0.735325396974839		0.369009628834725		0.0632182871032266	0.0316740259966797	0.0963487543972253
337	0.461862851243628	0.139470925350027	0.614280790898498	0.0915160601385459	0.37586007760805	0.0575116398760541	0.810963053837857	0.0246442212543581	0.123796942127571	0.934896408234569	0.558907017089128	0.128808973265073					0.358049331029181	0.0750803868359884	0.0412359029800866		0.107049648857398	0.130104147604199		0.191580443613381	0.746386916180841		0.387072940235066		0.0618261566646476	0.0308971189323865	0.096114514350916
338	0.484816465964063	0.133867245067339	0.632181669197006	0.0912512644368317	0.378322152167758	0.0556605247960774	0.816758467865228	0.0249051152721469	0.118769773409322	0.94085328754939	0.561676193928331	0.129533733285685					0.364567594548353	0.0768018099849515	0.0405532531165189		0.107108747262332	0.12789700779257		0.185786488582462	0.756766709275439		0.405202555118484		0.0604690260730837	0.0301546108480544	0.0960278810762326
339	0.507866116463511	0.128240863740802	0.649616286556988	0.0911076451832427	0.380800937225471	0.0539146063270329	0.82210565830847	0.0252268427259087	0.113780101799872	0.947720047309358	0.56461831015444	0.130415309375923					0.371082040024202	0.0787411277106148	0.0398079027431375		0.10744793552209	0.125852142359756		0.179895253501863	0.766582388938611		0.423158734947739		0.0591597679675469	0.0294450102444071	0.0961032911117923
340	0.53100040939746	0.122925397351704	0.666721449386981	0.0911150102499296	0.38335279661844	0.0522835156582896	0.827072222261966	0.02562880466834	0.108812606213164	0.954304188178554	0.567567818263169	0.131619923263808	0.13641123086422				0.377560303548077	0.0809315328676241	0.0390373752205741		0.108042181708717	0.124008300364477		0.173947738319229	0.775925322011979		0.440640578617474		0.0578988518271273	0.0287624235551585	0.0963605222400583	0.058198459041911
341	0.553415418170745	0.118267956429213	0.683369766209464	0.0913034443023661	0.386043821538231	0.050767542596201	0.832182174177593	0.0261025709721637	0.103889342002698	0.95986955078166	0.570826539619039	0.133020864734683	0.134832211615391				0.38383131855705	0.0834084166977442	0.0383064257804596		0.10881933154049	0.122420230448545		0.167991836665105	0.784922267697756		0.457835719521532		0.0566911751761617	0.0280972365645622	0.0968153101649815	0.0577291672892852
342	0.576040337041802	0.113580166628756	0.699635710766928	0.0917104623770439	0.3889100631724	0.0493722885051797	0.837314571793026	0.026656762619961	0.0991304419131815	0.963835078880792	0.573517287114208	0.134679267668177	0.132968063450439				0.390020396494482	0.0861956434874454	0.0376360940941216		0.110099350270433	0.121135486854041		0.162007894983477	0.793476932709765		0.475416474353446		0.055575385358054	0.0274603737500494	0.0974993714838454	0.0574522654205771
343	0.598175904986429	0.108915366864618	0.715335090760876	0.09237769371257	0.391980646749221	0.0481168879077491	0.842188643765331	0.0272957116351586	0.0945608078606949	0.965973326430843	0.576120491730456	0.136655028482379	0.131633637952461				0.396126185936254	0.0893549972681609	0.0370176181731539		0.111767857547104	0.120162795277269		0.156102718675578	0.801660045866597		0.492971521056615		0.0545689915253791	0.0268527211930593	0.0984304228656399	0.0574637983260837
344	0.618987905305091	0.104383399726597	0.730468428014049	0.0933294602434901	0.395308381578785	0.0470014681281688	0.84692696543487	0.0280510017276163	0.0901236094276509	0.965979044629651	0.578503390133742	0.138870979040876	0.130299441540055				0.402406712095344	0.0929384358552839	0.0364700221291556		0.113955107326008	0.119524333762799		0.150297838845397	0.809420502119721		0.509949527452614		0.0536797342725397	0.0262765860266105	0.0996346514076895	0.0574983102582873
345	0.638344479280855	0.0997659971373169	0.744959039077935	0.0946112907313112	0.398933648134254	0.0460390485175282	0.851146913290055	0.0289707858060862	0.085773508254407	0.964273698424043	0.581217402712105	0.141497139377387	0.128749638049377				0.408803723897491	0.096993268294659	0.0360143133721379		0.116537501808946	0.119219498707688		0.144548593314371	0.816920125853651		0.526198040113083		0.0529340308458385	0.0257364460172513	0.101156633850887	0.0576939151026037
346	0.656121816419831	0.0953071000665856	0.758721170241541	0.0962668083493973	0.402907864471501	0.0452481483385355	0.855183070075651	0.0300783356306919	0.0816328416973515	0.961585714628351	0.583790368970149	0.144251839460937	0.127093982002427				0.41520120115365	0.101590861734886	0.0354788054922632		0.119383138050593	0.119245866334436		0.138990533111715	0.824110349597895		0.542047701173145		0.0523503586085002	0.0252440823536387	0.103039094896282	0.057760257223841
347	0.672186551427584	0.0912811576920565	0.771903905267014	0.098302790465112	0.407258158736236	0.0446312885716607	0.859078754381442	0.0314017950772833	0.0777229328643845	0.95819220543282	0.587115773934958	0.147228088100745	0.125501700037898				0.421471122883919	0.106782603783515	0.0350466560658118		0.122532596862078	0.119568376708205		0.133561438244162	0.83097671031573		0.556822474665825		0.0519229918525728	0.0247989055389994	0.105294375547186	0.0579665664892346
348	0.687558590952429	0.0874327088010406	0.784327221634801	0.100744804775464	0.412009227833085	0.044193352969245	0.862901719839424	0.0329655915495832	0.0739028719341831	0.95389029682439	0.59047479056309	0.150521314287896	0.124441129441499				0.427520254358563	0.112601448688997	0.0346481284762228		0.126142717927604	0.120170259823525		0.128248269713758	0.837594553944745		0.571341259446655		0.0516630896659677	0.0243972593396374	0.10793279169433	0.0583570474397595
349	0.7011706506894	0.0839810599764293	0.795951321983526	0.103611947733065	0.417188792037496	0.0439338954448728	0.8668905358541	0.0348398588574729	0.0701386487719793	0.948756664493163	0.593872973252536	0.154027819696333	0.123972044729412				0.43343364365589	0.119092874836929	0.0343433865066326		0.130152161244379	0.121046558534215		0.123105072670849	0.843880205661033		0.585857641648935		0.0515730300386334	0.024043579879514	0.110981910680461	0.0587576718043256
350	0.713843297505906	0.080913347664844	0.806833929238064	0.106904713505654	0.422792936577988	0.0438523427553464	0.870705207828926	0.0370720854886225	0.0664306572402884	0.94313098216238	0.597224255500913	0.15790918646588	0.12316015035857				0.439240773433804	0.12630429219962	0.0341280978589066	0.096430965169064	0.134695223703427	0.122176359777187		0.118077075048306	0.849872467857836		0.599858089565509		0.051628253088101	0.023730664932189	0.114458050379699	0.0591888193821917
351	0.724586434914977	0.0776719380772611	0.816910471567648	0.110662642415964	0.428862666642666	0.0439578230582805	0.874451361115673	0.0397068345442591	0.0628403827000559	0.937551666947959	0.600597956172898	0.162083467803345	0.122339190207879				0.444889640265283	0.13427198947367	0.033999442944378	0.0957771419356539	0.139918603961	0.123575912300394		0.113190985948841	0.855640206572573		0.613255914424613		0.051836795426663	0.0234811664907709	0.11839499957226	0.0596562856727236
352	0.734609215537832	0.0743146949157731	0.826141157087561	0.114881241656933	0.43538372704919	0.0442295029387467	0.877706506102863	0.0428064349466551	0.0593407309983378	0.93242321186971	0.604362030385439	0.166589914910416	0.121963774389822				0.450694038705097	0.143008220844176	0.0339346462049501	0.0949240451471101	0.145580171925839	0.125228160869373		0.108476050996518	0.861074962362228		0.626570328475901		0.052191680472265	0.0232884292285745	0.122798614260629	0.0603407251906072
353	0.743304270126462	0.0707787736877698	0.834514340725105	0.11954676123393	0.442330191107446	0.044653285534709	0.880611072326896	0.0464169863153231	0.055872748755959	0.928392862417863	0.608539730582946	0.171320860345623	0.122147488854014				0.456681997681876	0.152530667333194	0.0339004498284473	0.0941329111573244	0.151752596717118	0.127134951809737		0.10387841528905	0.866249337277007		0.638881072944164		0.0526653423434737	0.0231357604250947	0.127658535389405	0.0611579921110862
354	0.750464026089025	0.0674057746386623	0.842172655988429	0.124689535914266	0.449707805355475	0.0452276245620429	0.883400225789337	0.0506008897919779	0.052480790505209	0.925881795816898	0.612926869306533	0.176355320094395	0.122197207362652				0.462498556599293	0.162854006092024	0.0339087068571146	0.0934651501966113	0.158542955338785	0.129319070965334		0.0993472470086965	0.871135643646693		0.649879736705495		0.0532691963765318	0.023028652383386	0.133017128896379	0.0620457689146319
355	0.756544905431451	0.0645802607581214	0.849167246722704	0.130337472768861	0.457510661261878	0.0459638194464498	0.885997333034772	0.0554053800406639	0.0492433200300803	0.925168662035552	0.617866655074565	0.181675266891569	0.122777108750442				0.46805309725946	0.173994083071628	0.0339977474828798	0.0925470518236914	0.165946584502736	0.13179257354887		0.0949423119930025	0.875827061651002		0.660010178395299		0.0540145240696981	0.0229760373205785	0.138915487296945	0.063264619130709
356	0.761645379677163	0.062262143263496	0.855489612571853	0.136496335370415	0.465715342421523	0.0468757923960363	0.888488238172112	0.0608708373935429	0.0462202808133226	0.926548557087768	0.622276672217912	0.187266406570714	0.1243539605036				0.473373664421896	0.18596479735964	0.0342068871609107	0.0916614254686193	0.173976259173098	0.134593791844157		0.0906970326836715	0.880246548111983		0.669623682352582		0.0549038445019425	0.0229809020756533	0.145374144562063	0.0647732783637291
357	0.765784149135857	0.0599379019596665	0.861277296731547	0.143184672503813	0.47429883866595	0.0479746695992188	0.890870508294754	0.0670511930869379	0.043410335546041	0.929965324599542	0.62664209528979	0.19351911727705	0.12692392825542				0.478930365977065	0.198770532399364	0.0345955436752295	0.0909722238555945	0.182938909353245	0.137750643627608		0.0866187001586042	0.884415597133029		0.679434312806627		0.0559497710273331	0.023049196889096	0.152410416471195	0.0667929603263937
358	0.769946115723674	0.0574511857451228	0.866578840593733	0.150434443830519	0.483282996772672	0.049279722329308	0.893093613577243	0.0740274379935612	0.0407887574542671	0.93490784239173	0.630966470093876	0.20038997443077	0.130413178852697				0.484630869053637	0.212417989133198	0.0351558276216662	0.0904947606456613	0.192775695991355	0.141318617311934		0.0827916039916702	0.888332075573367		0.689492792302517		0.0571805072650857	0.0231964251881919	0.160063871508911	0.0691561072036782
359	0.772604553714364	0.0554275663373365	0.871442413969034	0.158255876981892	0.492649446963032	0.0508108766788852	0.89520377340861	0.0818788475079614	0.0384128329290136	0.940632014313597	0.63518793645311	0.207743049406299	0.134225066842343				0.490510490616944	0.226920213841288	0.0359003641771917	0.090324430687914	0.203496166934339	0.145347808961382		0.0792141946014897	0.892002824765901		0.698965104732408		0.0586048465978064	0.0234214734655953	0.16837423391769	0.0719050789599324
360	0.775718562517698	0.0535466245759037	0.875929006126033	0.166692525782697	0.502400609519227	0.0526165847559373	0.897194337643459	0.0906535045138054	0.0362551655521319	0.946547584147959	0.63941206195677	0.215789760515068	0.138416714703576	0.143121145030029			0.496260007436087	0.242295397600827	0.0368105878855321	0.0903159571689111	0.215130080850705	0.149891017808322	0.0436794719086623	0.0758752436934964	0.895613025228428		0.707214179260997		0.0602509886439188	0.0237429488127229	0.177389138098978	0.0752238294778187
361	0.778570167752689	0.0514116067777867	0.880136734476054	0.175804487275648	0.51258854662329	0.0547457277146745	0.899124700878968	0.1004212240686	0.0343250327634578	0.95212457322931	0.643963492222924	0.224314775116622	0.143440992119004	0.142757485558299			0.501889785313974	0.258552550049858	0.0378717333096983	0.0902309906960193	0.227609551866647	0.154996498760779	0.0427021648259516	0.0728169227020855	0.899172065292249		0.715194446623392		0.0621656912429397	0.0241862375531441	0.187162456889662	0.0790282939251984
362	0.781313961678366	0.0499314347761144	0.884070719930503	0.185592751627409	0.523192070663197	0.0572335789037461	0.900996035795654	0.111260437446197	0.0325682751514062	0.956768997932176	0.647931046816932	0.233348204532126	0.149085944970028	0.142658951592753			0.507613317513523	0.275697202693681	0.0391101181228302	0.0903868770395331	0.240986960085125	0.160698853197805	0.0418716662373346	0.0700238094260548	0.902558749460002		0.723138656661247		0.0643675569797223	0.0247591026847861	0.197702379013939	0.083398740549798
363	0.783714768557147	0.0486075593604364	0.887861510160344	0.196103174798248	0.534221402551288	0.0601414179481733	0.903051793645882	0.123250409830067	0.0310296329398518	0.960070437103009	0.651350384329443	0.242850634616958	0.155255287104859	0.142837298831186			0.513040864996047	0.293745872375343	0.0405869375277807	0.0907600971749784	0.255358840806644	0.167045487760037	0.0412156713408443	0.067475752157223	0.905842015431866		0.730395176475544		0.0668871587705732	0.0254912669441072	0.209042812125321	0.0883052140689224
364	0.78586366189039	0.0478272897771778	0.891606065330766	0.207380797435573	0.545699596757913	0.0635241892318057	0.905151121172719	0.136478900888801	0.0297405524862161	0.962149166920333	0.654418757555122	0.253001411101614	0.162013202651195	0.143391086025903			0.517890488273579	0.312713373230042	0.0423499576584724	0.0913672170045792	0.270583969873476	0.174093169099649	0.04067493419532	0.0652126485935526	0.909042653884069		0.737571007074237		0.0697665835272584	0.0264140303313023	0.221236866439187	0.0937846419449906
365	0.788350952374533	0.0473742257830554	0.89522836085746	0.219431413542569	0.557625286569768	0.0674220735008858	0.90717607244526	0.151006054971355	0.0286358147289598	0.963254159735052	0.656896189473305	0.263573689024509	0.16966416143788	0.144400264126565			0.522800629327556	0.332578791988473	0.0444740772599216	0.092144012919729	0.286718776232428	0.181872844623702	0.040242027740724	0.0632060476365723	0.912263813328596		0.745042186462783		0.0730261442381998	0.0275483834236869	0.234292094862829	0.100059789829177
366	0.791094120752146	0.0465343504107263	0.898745913754272	0.232275172177874	0.569979271431176	0.0718854712775996	0.909277446510938	0.166884522885312	0.0276144259061293	0.963362344275257	0.658708792785305	0.274683913201252	0.177697148582147	0.145875869433185			0.527618290281489	0.353316579100442	0.0469033770709219	0.0932753653446104	0.303665177834903	0.19041997498641	0.040128856217036	0.0614568891211094	0.915428295697093		0.752862717459752		0.0766936628866704	0.0289250136584268	0.24821747319477	0.106836681794391
367	0.793964395649617	0.0452458801118022	0.90221609312697	0.2459294595286	0.582759631554711	0.0769524909857933	0.911626396484502	0.184164086937706	0.0266673403244137	0.962021350212237	0.660684699175917	0.286360713310814	0.185863336332129	0.147676491425629			0.532398534502706	0.374891965216801	0.0496152651730316	0.0948589091994746	0.321481829323178	0.199750311335801	0.0401477001540372	0.0599430130260988	0.918540274267269		0.760611226682454		0.0808002527929126	0.0305769298175551	0.263016355359295	0.1142238552944
368	0.797306838700573	0.0441759064939917	0.905616877412513	0.260402675336704	0.595972392113988	0.0826748811756544	0.913997403148387	0.202872986183915	0.0257893580749417	0.959045447788453	0.662717785643843	0.298441548579081	0.194408506728237	0.150062649725926			0.53671085021458	0.397261282914198	0.0527018001647678	0.0968173527332623	0.340056385049403	0.209893049322848	0.0403896712309803	0.0585904598803556	0.921587919213645		0.767611414000908		0.0853835760970942	0.0325463138474733	0.278698069452933	0.122192117775131
369	0.800122608558502	0.0432228394419359	0.90891126864477	0.275696735841943	0.609559060624234	0.0891014496904561	0.916391897703627	0.223001507659456	0.0249900863952354	0.954922650860356	0.664553169598644	0.310795430351932	0.203463505187097	0.152523106948489			0.540766961552917	0.42036539378051	0.056215590171924	0.0991007635453813	0.35921635230841	0.220860919891474	0.0407940728184771	0.0573319169844537	0.924621436323146		0.774084586735487		0.0904729682792284	0.034877722469544	0.29525621777453	0.130816933300227
370	0.803190965636913	0.042069818513884	0.912168800679118	0.291818771361626	0.623491139894755	0.0962827997955748	0.918766385179162	0.244521873924749	0.024240939463928	0.950498417069032	0.666488991185628	0.323546239631273	0.213146343434826	0.155403887897572			0.544568311482559	0.444117186251524	0.0601683139664607	0.101739917144551	0.378835438581934	0.232663453704083	0.0414817618287536	0.0561820569214758	0.927600857118069	0.0397126332244002	0.780580224776493		0.0961099636953196	0.0376237844073789	0.312677656894324	0.14022748482321
371	0.805439707471099	0.0411559788390927	0.91535689534676	0.308733906850262	0.637710579235548	0.104250019329072	0.920904849443826	0.267403432603845	0.0235380007410623	0.946175665133188	0.668291109724209	0.33649013702498	0.223405239968016	0.158588226368339			0.548367225923731	0.468404280553719	0.0646045662984406	0.104943281826189	0.398938891382196	0.245311905081984	0.0425047112308896	0.0551430902451949	0.93041215947189	0.0388966328822653	0.787595221477478		0.102329538319245	0.0408316405024605	0.330928233610403	0.150361806613378
372	0.807162495782125	0.0407690662608127	0.918395986776345	0.326399133976457	0.652141936666798	0.113045966341842	0.923005356286212	0.291576748275355	0.0228761036527933	0.942141218708849	0.669716710578569	0.349870058033766	0.234207377911093	0.162542218048131			0.552249273465234	0.49309723484982	0.0696605763305378	0.10877497356078	0.419432955737577	0.258801296444676	0.0438498080255061	0.0541980746616187	0.933038880130375	0.038040151621976	0.794351297881315		0.109168765353116	0.0445593004664114	0.34995344368652	0.161339846646041
373	0.808952460233812	0.040050269547741	0.921308101572154	0.344800524481795	0.666737069791059	0.122726804072538	0.924939420026661	0.316937845836835	0.0222718538974934	0.93868620941041	0.671843185848745	0.363734512421632	0.245941642513662	0.167287686518922			0.555894491403971	0.518063060465222	0.0753721963028365	0.113549940506607	0.440093749759681	0.273132118580648	0.0456649696267259	0.0533525733816245	0.935555990943635	0.0371572130856102	0.800601093046981		0.116672784589198	0.0488754190083294	0.369726136500892	0.173148555477949
374	0.810714133745371	0.0391799228634275	0.924049727791255	0.363888869655841	0.681446319803828	0.133342990867945	0.92668326666877	0.343353928226107	0.0216796212120023	0.936072116235689	0.673802215158292	0.378005680271706	0.25821705246661	0.172683251554415			0.559603857272917	0.543154380913504	0.0817852684723791	0.118985736089411	0.460865928961863	0.288304248336655	0.0479521083404161	0.0526217672321617	0.937959504367771	0.0362615467231138	0.806482046394157		0.124891755978113	0.0538490497047985	0.390194919772762	0.185821673718906
375	0.812166089251787	0.0382150242879083	0.926588022175779	0.383614216457763	0.696196445188504	0.144952241366292	0.928396419282998	0.370661943828465	0.0210541653470482	0.934061358415521	0.675926657806579	0.392716005189877	0.271250679330386	0.179053797042726		0.24589468289979	0.563739338035814	0.568209000132299	0.0890075081483359	0.125293982412553	0.481547800141938	0.304296072713461	0.0507026193819715	0.0519931949721276	0.940214908844047	0.0353926679607841	0.812038561256027		0.1338762195808	0.0595672681758597	0.411298443807722	0.199483599418496
376	0.813424893157437	0.0372553363114068	0.929008915413114	0.403934686157407	0.710917982563611	0.157623555065084	0.930146620197212	0.398695281725785	0.0204875470472161	0.93228712115247	0.678685715702638	0.407899244947792	0.28496291725662	0.186195170779755		0.241299494149598	0.567874015054505	0.593078780350694	0.0970672093491995	0.132606809899325	0.501878346650031	0.321098722731283	0.0541285987262896	0.0515155954298768	0.942280825545633	0.0345791129684885	0.817135678574908		0.143684859709816	0.0661247865746475	0.432972709667597	0.21396559530398
377	0.814351025002906	0.036760967778394	0.931239704705068	0.424781486928374	0.725566328028577	0.171407435443334	0.931733484924783	0.427268244506632	0.0199969909884394	0.930854979473571	0.681518015208341	0.423473305731914	0.299424467800383	0.194341350449945		0.237035381254526	0.572026288215451	0.617611969782732	0.106160052751399	0.141217274712098	0.521826266681218	0.338697705655403	0.058192261177268	0.0511618280649218	0.944163764160017	0.0337698690248642	0.821700996431122		0.154368037160557	0.0736072574067472	0.45513351399492	0.229505019367811
378	0.81510818728984	0.0365537448155773	0.933256545166362	0.446095097333892	0.740100105891598	0.186370211184859	0.933151644127286	0.456170625248599	0.019586444854945	0.930559811731671	0.684141995206383	0.439368253980691	0.314651052469313	0.203409292846898		0.23401141434883	0.576129440290917	0.641651561989512	0.116393870830543	0.151174637394547	0.541269201440426	0.357086322557444	0.0631268598640648	0.0509635263519744	0.94587988078228	0.0330661514747018	0.825898850221741		0.165990089160815	0.0821131043553547	0.477697882172607	0.246130223844952
379	0.815449763913866	0.0365922639429233	0.935114327233942	0.467811248813934	0.754446849685981	0.202567446629802	0.934448361351235	0.485187728001834	0.0192392498373148	0.932246785645248	0.686620431143947	0.45549989856698	0.330659066801867	0.213632067874939		0.232441849911925	0.580298249111049	0.665045141844574	0.127800601501115	0.162401128636693	0.55989224736167	0.376236856051088	0.0689751260711146	0.0509585915590833	0.947475950604197	0.0323959191504157	0.830294614657469		0.178601285991327	0.0917370504923633	0.50057355802425	0.263884834981837
380	0.816058859695288	0.0370672360963901	0.936737402523616	0.489847720218649	0.768576332581981	0.220047162770067	0.935613218613004	0.51411153653706	0.0189552563720019	0.9359023130281	0.689017422207143	0.472091903410223	0.347210626086771	0.225305709220745		0.232075498656455	0.584366716609997	0.687653039100302	0.140449194253959	0.17521984608221	0.577855786127926	0.396126482707945	0.0759139762058566	0.0512053675077934	0.948944928374646	0.0317683421738497	0.834247372014413		0.192254275069598	0.10257554586773	0.523664334389089	0.2827042706019
381	0.81682938398579	0.0379457664330685	0.938231520393865	0.512107138488096	0.782435469839995	0.238846133119586	0.936619805166654	0.542737274203412	0.0187672937167444	0.94066352230434	0.691126566788936	0.488896609990708	0.364453323806376	0.238501363163032		0.232753698331087	0.588540326797078	0.709349211126839	0.154460901757368	0.189741108507584	0.59497068351845	0.416716617673622	0.0839648591360959	0.0517224389044275	0.950333959106106	0.0311904650400349	0.837972332690577		0.206997437934012	0.114717581797418	0.546863516374811	0.302354786245202
382	0.817983617214851	0.0388934944282752	0.939553935831237	0.534509165188252	0.795989679637916	0.258988876063074	0.937632930544603	0.570842855279704	0.0187004215220985	0.945679697018186	0.693280771827185	0.505954332077995	0.382749090345489	0.253359262740539		0.234054275611593	0.592665329720868	0.730026468264686	0.169945189913357	0.206014165807703	0.611039812184382	0.437948188015764	0.0933443794634777	0.0524554897220567	0.951689851447239	0.0307317182153678	0.841211675940243		0.222861882806198	0.128246084133913	0.570064535895871	0.322782118794626
383	0.819345310613401	0.0400373674419533	0.94074115134044	0.556960554802624	0.809195297799866	0.280481217402144	0.938557723615108	0.598218934351681	0.0187451949033707	0.950361469703912	0.695305310172162	0.522947694000949	0.401846159680776	0.269672288562627		0.235984658582101	0.596476979560743	0.749607851656319	0.18702820417394	0.224482176902979	0.626000619026367	0.459771396643632	0.104157215662542	0.0534101837142189	0.953004195953911	0.0303050919063371	0.844321562620262		0.239869633973644	0.143226761701954	0.593165814256369	0.344009216918124
384	0.820607944083245	0.0416751838579787	0.941824018469507	0.579352851755825	0.822005412821434	0.303302528920897	0.939590375893019	0.624696243352666	0.0189019666315871	0.954125364781239	0.697354969418144	0.539725746256953	0.421214447555816	0.287791963098307		0.239027566054141	0.60021185721805	0.768024137993319	0.205760943204368	0.24488323153667	0.639888795862217	0.482121736677976	0.116492211053771	0.0546028164982988	0.954234672133117	0.029952891272199	0.847674156275694		0.258041970938348	0.159710252392489	0.616056936991332	0.365913191576449
385	0.821197016667014	0.0439849409013014	0.942793473100218	0.601592414888261	0.834389487643062	0.327423681281078	0.940682580165818	0.65012213099038	0.019172597902524	0.956355614730763	0.699700021332414	0.55635622823407	0.441353838282646	0.307672749692482		0.242736476277115	0.603795946793091	0.785221392682426	0.226121273199087	0.267536571256534	0.652711054238342	0.504930221015706	0.130495911296462	0.0559982842661139	0.955379177206116	0.0296766338425717	0.851377454253056		0.277383289837272	0.177743547247267	0.638637701452899	0.388293969929075
386	0.821686915395077	0.0466889839723004	0.943641289168333	0.623578205786437	0.846325081783622	0.35278479704891	0.941637637830172	0.674363874357987	0.0195877977359749	0.957179826167342	0.701959130632156	0.572683156924507	0.462051901120583	0.32895054334214		0.246792153755379	0.607035814971304	0.801163053831057	0.247998659852011	0.292301121973818	0.664486030729841	0.528111849286949	0.146372175576902	0.0575766274621664	0.956443006336696	0.0294273666196268	0.855215824032123		0.297877147144532	0.197334165572277	0.660796531326308	0.410907265560837
387	0.821776306702521	0.0494886520769502	0.944407518921433	0.645197937223062	0.85780115900112	0.379292074167249	0.942394966740997	0.697304475902506	0.0200648779178698	0.95727577388815	0.703734480783511	0.588507552952839	0.482957322323371	0.351977197977357		0.250663572489221	0.609876561416261	0.815835313984874	0.271454198113731	0.319382137769549	0.675229289050112	0.551556165558894	0.1641149032358	0.0592994821171273	0.957420571355135	0.0292358733122745	0.859168006422183		0.319485719650522	0.21846805843365	0.68243072917399	0.433675366075088
388	0.822020890502098	0.0522419066955513	0.945154392909706	0.666366326096538	0.868787961716095	0.406847073924752	0.943177226294082	0.718862055634188	0.0206469167759502	0.95660618188601	0.705594578837164	0.603785760196134	0.504239172431481	0.376537879102811		0.254905477446588	0.612529360832839	0.829248442106459	0.296224363353342	0.348179980874778	0.684936666467046	0.575147689428772	0.183862342351427	0.0611627522902266	0.95835261204704	0.0291176283559923	0.863148659572893		0.342162333230536	0.241111945075785	0.703459907428013	0.456371712768651
389	0.822374878238045	0.0551510609308113	0.945872411494918	0.68697353156807	0.879243145016315	0.435302227984855	0.943778376620758	0.738986164429992	0.0213162707853003	0.954258132888636	0.707743593918822	0.618381204608416	0.525609115657347	0.402597948058163		0.258771849849673	0.615028426860864	0.841440989844191	0.322112802962637	0.378460521070986	0.693665548112527	0.598761448024121	0.205611613627025	0.0631364307910485	0.959255926918573	0.0290388578478488	0.867237509522688		0.365818908307657	0.265194439304275	0.723794959682933	0.478773697538223
390	0.822913973360495	0.0579521410174376	0.946492454663395	0.706920525999095	0.889157781021707	0.464491971941704	0.944332971383435	0.757647487197194	0.0220645491112111	0.949358383881388	0.709816505192551	0.632264173340575	0.546920153847197	0.429879481118112	0.227251195092438	0.262004890273179	0.617449334907782	0.852465489545668	0.348924044265205	0.410404403013632	0.701577439824009	0.62228355141312	0.229356303226793	0.0652237676652253	0.960096818286931	0.0290603833703663	0.871144048345746		0.390350199582204	0.290607001923022	0.743356097325211	0.500779702383634
391	0.823234185803417	0.060465169853449	0.947127619648735	0.726134487793066	0.898526560150762	0.494229872698289	0.944867778513956	0.77484841071708	0.0228765622314434	0.941911686687847	0.711855590499193	0.645304833704398	0.568358129854697	0.458067667571978	0.225403123872393	0.26465089248515	0.61991544479685	0.862369470660006	0.376511344777435	0.443671267896916	0.708659974013049	0.645581483176524	0.255029471113122	0.0673749258100197	0.960856691797798	0.0291351237832617	0.875301533092665		0.41562836475284	0.317209695315044	0.762068580672874	0.5222169471084
392	0.823152920783202	0.0627919227864812	0.947620682260115	0.744557130233053	0.907350481411099	0.524321841068338	0.945432937108099	0.79060073313472	0.0237413078109731	0.932839529397718	0.714087733496698	0.657588249449103	0.589829666000441	0.486743666094847	0.223420010314653	0.267079206999661	0.62213822263465	0.871224208668093	0.404687697394036	0.477843548896529	0.71517311547985	0.668535060829437	0.28263359079729	0.0695760634561951	0.961568481584834	0.0292405590454385	0.87934734290244		0.44150716011186	0.344840537453208	0.779876323640088	0.543043476583962
393	0.822947367601677	0.0650667757437707	0.948073837390004	0.762126461702626	0.91561752779849	0.554564211971674	0.945993204946236	0.804969576274557	0.0246483304934162	0.923470122677876	0.716056975915269	0.668997878421022	0.610509944335972	0.515689121570055	0.221819264793758	0.269531164351625	0.624335195173929	0.879112203140448	0.433093507365098	0.512637976330961	0.721169370313262	0.691013851766339	0.311962124893168	0.0719152722248244	0.962186887049661	0.0294007346405481	0.883286263661337		0.46782730263014	0.373310014626929	0.796737048214099	0.563214126517267
394	0.822456291777943	0.0671904472366334	0.948498829050268	0.778788157941279	0.923330410705184	0.584730812784931	0.946554084436051	0.818030559717676	0.0256299080579378	0.915317081395213	0.717974480155455	0.679737293811883	0.630411627594857	0.544804246796839	0.220666431383806	0.271820371008565	0.626595812341665	0.886109771903734	0.461208191379092	0.547228859759835	0.7266232323151	0.712897803649466	0.342821438146344	0.074426001565551	0.962718690674784	0.0296585381300822	0.887018562118221		0.49439971155398	0.402403861628758	0.812617059580201	0.582346225365754
395	0.821685439993133	0.069008980328391	0.948902892003414	0.794520634044654	0.930504914894561	0.614615439295276	0.947000627083903	0.829848905717389	0.0266987753135846	0.909845136857013	0.719147993118224	0.689904990432561	0.649450977244599	0.573385489137922	0.220169326206585	0.273992446594929	0.62888892216065	0.892304083995943	0.4887609673403	0.581523388076461	0.731554634448521	0.734081281889131	0.374925921410602	0.0771012437878131	0.963231641856051	0.0300230973073523	0.890277847339849	0.244187358497153	0.52102865801486	0.431896476717771	0.827490620015354	0.600464512896112
396	0.821651458388649	0.0705984383194569	0.949332819325103	0.809315341544054	0.937145231325407	0.644005614999972	0.947300891598716	0.840474883714543	0.0278842560706574	0.907760785992461	0.720323121623037	0.699392211557918	0.667278362411683	0.601596793774423	0.219993583254371	0.276350239731267	0.631207174863757	0.897782010859503	0.51554790074894	0.614937230114873	0.735741294367865	0.754466449290155	0.408041429813865	0.0800331850069646	0.963730578191111	0.0305194775035581	0.892928207600993	0.243021958072798	0.547512004313348	0.461533463087452	0.841348510850646	0.617638592447245
397	0.82203472919789	0.072222921776406	0.949780089123939	0.823174132199968	0.943262289507136	0.672703366102928	0.947603871807663	0.849983094153631	0.0292226668569724	0.908546702485546	0.721338803405871	0.708121457529999	0.683632734045345	0.629257940439348	0.219984791528438	0.279313495280175	0.633508291008417	0.902627229860008	0.541365827711263	0.647362711550238	0.739709318841537	0.773978992447613	0.442072342797251	0.0833207477473463	0.96423995975201	0.0312472511889165	0.895236210628147	0.242052922240981	0.573647011007568	0.491077147867663	0.85420011778219	0.633782080211696
398	0.822794023649898	0.0742676219726982	0.950132911803757	0.836101976767607	0.948861175063542	0.700534232433968	0.947935882125842	0.858473596535108	0.0307512447918051	0.91080152899366	0.722379596089795	0.716335801234707	0.699137042108636	0.655692843715905	0.221196648605858	0.283235921822179	0.636073005858487	0.9069183977914	0.565877530639975	0.678099604300936	0.743387054734087	0.792557916630358	0.476618830965569	0.0870490111601661	0.964776219304947	0.0322454309711872	0.897341165301271	0.241673347570095	0.59923766597184	0.520278871687094	0.866049275651849	0.648856350329354
399	0.823363190319407	0.0771258093209875	0.950386218528269	0.848097596268137	0.953947139983677	0.727310773650428	0.948149514498795	0.86602973872822	0.0325231925774018	0.913259578241742	0.72338927986724	0.723934315681186	0.713800659189523	0.680676066064245	0.222838459323873	0.288152610682959	0.638747300997623	0.910726362668531	0.589036541749294	0.707168021711247	0.746692421905166	0.810144898529198	0.511172676106027	0.0913571457234945	0.965325245069653	0.0335797554585454	0.899181036851209	0.242733996573117	0.624076779095373	0.548880290565044	0.87690607691599	0.662874044122465
400	0.82367650528625	0.0809809511210251	0.950634764454126	0.859186478448424	0.958546962020278	0.752884502999887	0.948359388064534	0.872727625448863	0.0346268289091948	0.915140015438417	0.724068886266493	0.731138365689924	0.727401433840721	0.703994209741916	0.225610883775071	0.294424114306158	0.641434108883964	0.91409338587958	0.610756804903037	0.734834532196908	0.749628472637831	0.826689242186744	0.545211308637622	0.0964064112104097	0.965825713312957	0.0353862921530732	0.900905787708918	0.245477221120799	0.647974554124544	0.576640992919824	0.886803231931357	0.675744696939198
401	0.823790606949028	0.0861673494664995	0.950919858087709	0.869392340288948	0.962660125580955	0.777121086677659	0.94857703801096	0.878628638556855	0.0372293772599965	0.91617659133531	0.724714261285382	0.737865493936962	0.739875036123118	0.725450637862842	0.229520068020883	0.302473593141706	0.64410307766766	0.917049097650561	0.631016627740921	0.7603935617853	0.752360834132043	0.842148571696407	0.578511710256399	0.102335144243554	0.966286108070257	0.0377880269959502	0.902096543511501	0.249604220463897	0.670760849984124	0.603334304014681	0.895772493550757	0.687370423492282
402	0.823986331627266	0.0930927713793898	0.951159718757299	0.878734093377129	0.966259608727948	0.799920199504742	0.948735019235079	0.88377365610311	0.0405130961469115	0.916337237006369	0.725417244989111	0.744135118383129	0.750897062089246	0.745168619642293	0.234762937834883	0.312464859669982	0.646714408748745	0.919634102662441	0.649592641716962	0.783659039032231	0.75481812649389	0.856496638449169	0.610842362141005	0.109379302324575	0.966740652812055	0.0410346956256838	0.903213044516697	0.255287165071756	0.692288189817857	0.628757977380938	0.903846493228303	0.697921926019245
403	0.824354182338083	0.101891776965042	0.951436049968599	0.887230135346364	0.96933469261899	0.82119613999764	0.948805492247337	0.888209318192798	0.0446625008032057	0.915922914381186	0.726102010095217	0.750043786873677	0.760609904668732	0.762929763966346	0.241867362702231	0.324557217921141	0.649134380864241	0.921864625076319	0.666480082358498	0.804709937962016	0.756933794123085	0.86971310774607	0.641807940951343	0.117746566503353	0.967130861684151	0.0453655246193781	0.904194458880386	0.262849501750194	0.712425714028082	0.652740713417014	0.911054313809002	0.707440319079568
404	0.824683485780856	0.112842220813699	0.951682867154242	0.894905851296147	0.971874793532578	0.840891901226795	0.948754211557396	0.891958245401771	0.0498943844781489	0.915396857504895	0.727188556285358	0.755612981658693	0.769405653859951	0.778828617838765	0.250725722081041	0.339225774180135	0.651342059735622	0.923738956759075	0.681691745956787	0.823451776080794	0.758589370619277	0.881805358686302	0.671119411328531	0.127618708183719	0.967449412033533	0.0509848938993029	0.905270559952211	0.272201586433351	0.731079140900622	0.675140340313897	0.917421210913519	0.715902111679187
405	0.825066754267937	0.126207953202467	0.951822197465827	0.901810771597874	0.973859853788047	0.858988346373958	0.948518312446202	0.895028371695201	0.0564454143730086	0.915293255576763	0.728655877068559	0.760842396360631	0.777315529144216	0.792857993268033	0.261576848882065	0.356399456132017	0.653599841265095	0.925258349194875	0.695434412933143	0.840260223922002	0.760009701807187	0.892776952557634	0.698583143620191	0.139174394953832	0.96769201615615	0.0581746482865602	0.906449153825847	0.284300458301861	0.748195324319912	0.695843323632422	0.92298287256911	0.723671058142377
406	0.82577497137545	0.142463709699523	0.951772661111532	0.907966458769001	0.975244610144462	0.875443763741997	0.948071440196979	0.897433614148893	0.0645299650233222	0.916085393727135	0.730808257122073	0.765728494867457	0.784685511945952	0.80534184985503	0.27417687269314	0.376400863002561	0.655760239912279	0.926397500333767	0.707773183545274	0.855039046924302	0.761336780597767	0.902622352146895	0.724114902411885	0.152606746476929	0.967810052868212	0.067223308066691	0.907582391339969	0.298609500564299	0.763723407150829	0.714762349899458	0.927768555430507	0.73072137884037
407	0.826165792513496	0.161610192832163	0.951461036371935	0.913383957587516	0.975986909353558	0.890241070935035	0.947485809395082	0.899238906156378	0.0743505176429628	0.91826641386332	0.732864676172628	0.770253871421841	0.791755505966524	0.815889620848193	0.288806957393674	0.398855843625015	0.657896135340908	0.927134015988675	0.718801755932848	0.868166122606719	0.763014631563468	0.911338215713581	0.747545281678754	0.167969988083406	0.967767447229052	0.0783282196466066	0.908998936407044	0.314923709525909	0.777635364290014	0.73184368210514	0.931789766365088	0.73694065121464
408	0.826071534610808	0.183555006180387	0.950885502550167	0.918082182908116	0.976059334083208	0.903386726645558	0.946698153779135	0.900482252292429	0.0860821724813703	0.921941616856717	0.735082165264918	0.77444512235187	0.798887876739029	0.824784128290599	0.305942669846246	0.423728351728886	0.660059450158654	0.927465334464159	0.728599166650618	0.879653145060955	0.764345960503933	0.918930070071256	0.768403631891107	0.185305346731386	0.967556819300143	0.0916683681388478	0.910439541246881	0.333512975349236	0.789929984235346	0.747040540590123	0.935060513931477	0.742527091196223
409	0.825848910985799	0.208325808989258	0.950110405257232	0.922108146488396	0.975442913156598	0.914903760415331	0.945703208942517	0.901175051862405	0.0999598428911108	0.926930265752204	0.737289394720794	0.778345112080748	0.805300096850519	0.832357827935947	0.325441895551331	0.450802859597802	0.662008057543038	0.92738592859215	0.737207482691203	0.889732270813226	0.765562948342542	0.925428613705386	0.786859740007309	0.204636561614469	0.967156686318785	0.107431082488001	0.911628950338774	0.354002325747746	0.800635416509601	0.760351960750958	0.937623718023474	0.74754447218588
410	0.825736053004021	0.235475980335995	0.949084537200281	0.925503010104626	0.974148285672595	0.924861027224593	0.944504084503685	0.901349400599432	0.116071090809227	0.932857546895794	0.739753650360292	0.782137619089868	0.810647376023573	0.838908493368836	0.347248866500116	0.47973661946112	0.663740275946361	0.926886273004681	0.744734179902397	0.898639325061843	0.766928596629533	0.930884897133072	0.803202406120177	0.225877801336414	0.966523729450892	0.125694202390976	0.91286123184815	0.376007011540227	0.809818156984412	0.771833807296359	0.939524698398176	0.752119314459863
411	0.82598178464981	0.265013824650431	0.947724703999401	0.9283252756847	0.972167763038201	0.933344025507514	0.943098305841345	0.901058654864262	0.134424605605425	0.939287320189202	0.742317459889365	0.785648413284908	0.815694483212319	0.844820076733424	0.370953302373479	0.510008904306094	0.665409207186462	0.925988016960754	0.751309024504654	0.905940097153531	0.768381655636514	0.935358299801413	0.817816071012205	0.248836814061976	0.965716241372625	0.146566105952552	0.913958961619308	0.399422369661896	0.817580987563223	0.78157044205056	0.940809714760669	0.756594470998738
412	0.82641390397444	0.296410436013191	0.945991616040323	0.930633846874119	0.969538829082483	0.940458054886502	0.941381931857516	0.900385612718231	0.15488047200268	0.94561822517283	0.745291856817708	0.789180869930875	0.820362310743782	0.850138608255339	0.396592619512765	0.541268046004283	0.667058227730636	0.924730395487083	0.757057587410348	0.912264608176317	0.769736063557169	0.938914338659129	0.830600749547094	0.273309679254901	0.964718672679921	0.169949823680071	0.915288172928518	0.424510357679453	0.824041532319899	0.78969336661038	0.941528222970574	0.760993466345049
413	0.826885700589044	0.329205469295704	0.94391345746899	0.932485773903519	0.966336703984344	0.94631268566291	0.939541619034194	0.899431866109595	0.177264248991667	0.9510600685773	0.74826182753307	0.792556771479804	0.825008020822532	0.854750969038125	0.423620871128062	0.573466310738953	0.668666520446077	0.923154081662803	0.762055446200018	0.917855120512604	0.7710945530761	0.941633729103365	0.841565359434677	0.298966510625019	0.963511561092575	0.195745670000064	0.916389677636315	0.450690911601101	0.829328739534382	0.796349509761092	0.941756099184809	0.765341983550496
414	0.82746067476747	0.363071975222114	0.941534489833228	0.933948501439085	0.962648655821653	0.951033727074823	0.937575249935992	0.89829298637006	0.20134256782166	0.954912526309082	0.750943297605833	0.795648409109222	0.829355952314204	0.859133117269215	0.45173865108094	0.605777351274989	0.670443794955502	0.921322048314321	0.766261736612298	0.922513609794308	0.772382664396765	0.943609277230352	0.850896921042188	0.325450546656253	0.962112578039873	0.22368107717043	0.917164158271206	0.477723849020872	0.833585201083276	0.801690754014515	0.941579063975194	0.769537602683366
415	0.827958502541394	0.39743143739837	0.938888825132392	0.935099881664074	0.95858539723243	0.954761591321424	0.935610122298744	0.897049360805624	0.22685235318737	0.956839320673063	0.753311944739425	0.798699437110065	0.833351523172847	0.863319678445208	0.479828207358273	0.637131139534317	0.672298177325524	0.919320131579156	0.769974703994137	0.926883207204904	0.774007713223342	0.944951122072065	0.858859309242853	0.352368372613665	0.960601967733592	0.253560323308897	0.917620137751154	0.505275358655665	0.836956486853813	0.805886427217887	0.941086376262936	0.773616765019986
416	0.828592741700082	0.431580603713747	0.936141588193149	0.935994654630968	0.954278786146752	0.957631043949132	0.933672280863081	0.895819938426955	0.253390370885136	0.956606586229383	0.755547817427958	0.801674251956189	0.836958616498686	0.867127168592632	0.508004001054519	0.667591394039633	0.674032583448812	0.917228016749756	0.773264383943629	0.930669849941746	0.775805961964434	0.945760400708978	0.86564439648349	0.379320153350177	0.959031016292284	0.28488284926741	0.917968632878139	0.531935824533081	0.839585646639174	0.809126117430057	0.940356520748231	0.777454935210193
417	0.829130690637582	0.465091743022261	0.933385240955976	0.936695580663357	0.949888750418278	0.959814209722885	0.931870702088469	0.89471240506415	0.280641873571974	0.953887563636751	0.757444974616101	0.804596038708151	0.840045881678543	0.870559580936093	0.53620060188036	0.696339019288692	0.675840862075217	0.91515205933496	0.776204489240779	0.933858232604595	0.777436960366717	0.946162093375718	0.871400005568255	0.40590218757157	0.957388774846782	0.317112171215887	0.918560367068896	0.558098639550469	0.841635387661406	0.811600277872424	0.939482045787807	0.78102194487063
418	0.829489854648564	0.497488089730453	0.930722643461889	0.937274294586123	0.945579078318128	0.961472656306289	0.930237705722216	0.893804670487161	0.308362775470353	0.948603261671219	0.759301574087904	0.807412823907774	0.842797824117813	0.873808263780216	0.56379847627289	0.723571420929377	0.677385535264854	0.913198296569918	0.778693395061516	0.93658275686726	0.778694768953696	0.9462826499897	0.876284736165795	0.431912326493156	0.955759112149455	0.349921144323053	0.918900426818662	0.583534328477988	0.843273667007778	0.813497783495265	0.938561508939785	0.784461775698858
419	0.83029653016071	0.528585150381875	0.928212982359015	0.937781475426275	0.941502897667509	0.962747237717247	0.928835690740972	0.893168053464862	0.336240860011839	0.941398521963496	0.761113757820079	0.810335027871318	0.844884178266458	0.876836575837512	0.590708765386874	0.749106878645579	0.678841033479794	0.911444588735719	0.780849446265452	0.938680046055972	0.779998894071195	0.946238917650631	0.880608385686019	0.457107999208057	0.954201633963851	0.382943588660472	0.919202622208759	0.607681432260726	0.844650373439602	0.815012485681286	0.937689711954933	0.787846827148628
420	0.831302404452289	0.558162766626351	0.925916514372035	0.938252927488858	0.937789779865205	0.963761843075966	0.927685802316783	0.892863549332995	0.363938018016249	0.933472345367996	0.763051766055442	0.813322295082748	0.846968915426921	0.8799122706484	0.616212742597498	0.772742077459231	0.680345548838866	0.909962489970463	0.782900572457275	0.940511675713985	0.78134771069113	0.946128678666875	0.884392669722219	0.48130489319586	0.952740216703609	0.415589105471506	0.919725538234024	0.630388836856816	0.845892052252968	0.816312338992074	0.936933971760685	0.791144588728038
421	0.832320696155321	0.585934944044521	0.923925621211779	0.938741876552655	0.934541738873148	0.964623053202474	0.926895632781311	0.892920861594284	0.391162761854324	0.925772469122205	0.764484434906242	0.816250017590822	0.84917931214673	0.88271930012152	0.640380257621941	0.794362960034127	0.682076644440238	0.908818091590478	0.784942571452505	0.942128407205761	0.782599212716508	0.946035518149455	0.88766425798611	0.504387397833528	0.951493160964415	0.44765714570486	0.920363849280865	0.651218597711639	0.847111451542649	0.817531495148947	0.936338145064546	0.794247340610951
422	0.833022488425094	0.611543120234621	0.922283832060751	0.939265319881535	0.931864529947874	0.965416259301383	0.926498589522021	0.893341276410575	0.417804415685608	0.918882201775919	0.76604158438258	0.81926502105699	0.851304631742797	0.885112430241161	0.662790924167251	0.814374283766599	0.683908390890431	0.908055080452218	0.786920729630626	0.943697660691041	0.783781772176644	0.94603963555944	0.890372800247736	0.526334450483561	0.950470570694626	0.478852008116512	0.920967602618574	0.67043349793738	0.848385485640117	0.818778152400006	0.935940235512416	0.797034656358478
423	0.833308417654038	0.635141168854102	0.921058870093559	0.939838930671444	0.929818013803048	0.966203633861256	0.926549963982989	0.894104724235705	0.443806037363924	0.913319028769417	0.767199397059997	0.822100179223084	0.853320094520279	0.887151045272826	0.683007933901324	0.832614115172246	0.685595863490325	0.907693197864254	0.788692536603211	0.944863006905293	0.785065997774397	0.946186767214561	0.892738040708394	0.547143799165365	0.949730345463983	0.508961135981997	0.921471133022629	0.687434164521294	0.849780512370318	0.820126169505998	0.935774960675537	0.799592072810242
424	0.83339896062962	0.657030132261218	0.920312852835401	0.940477806782399	0.928418726119085	0.967026324058344	0.926879258647993	0.895162171522683	0.469148583924814	0.909350569906499	0.768390601124801	0.825083027287103	0.854996235356624	0.889230114004841	0.700870389756219	0.848639866292013	0.687239160069671	0.907737973909082	0.79045645703175	0.94570017343033	0.786321402078315	0.946515368937047	0.894831085377722	0.566872856708585	0.949283476529182	0.537453335553356	0.922116102767147	0.702608798086814	0.85133456856722	0.821625064045601	0.935839124099148	0.8017921507244
425	0.833434665945787	0.677016447545322	0.919985180131975	0.941185775602859	0.927654645578156	0.967906944598405	0.927438123463504	0.896458721505347	0.493814871625943	0.906673527663027	0.769967735572878	0.828239139607642	0.856365723030036	0.891104414750536	0.716368473923117	0.862909058855114	0.68894344722799	0.908165827972067	0.792319804920494	0.946609951440816	0.787686893619995	0.947037632148107	0.896758850995686	0.585611219455279	0.94914102300352	0.564232165447577	0.923243446671311	0.716021338556217	0.853070041374816	0.823309950111419	0.936120870091486	0.803879128371908
426	0.833567212146697	0.69542119121551	0.920076301659754	0.941954291846722	0.927474388633228	0.968837689947402	0.928117036463917	0.897942809911628	0.517741958161105	0.904410219397732	0.771656395199294	0.831372866543481	0.857749996764727	0.892776154205662	0.73106958523905	0.875971619339417	0.690615675642112	0.908933026587204	0.794175720926208	0.947172044244047	0.788891475886153	0.947730515426281	0.898487217008747	0.603462178125663	0.949260915144023	0.589140908704375	0.924550154193629	0.72779555823253	0.854979932828261	0.82518382301686	0.936595000332046	0.805991991365799
427	0.833711146714359	0.712489448766229	0.920458075008983	0.942778368752659	0.927801463641159	0.969813686399753	0.929000203772093	0.899539348219607	0.541005867140356	0.901891997060059	0.773220571700193	0.834388218311046	0.85950078904533	0.894459042437852	0.743989129173574	0.887690600052332	0.692328472054691	0.909985815769964	0.795894611865908	0.947629143702511	0.789985772103762	0.948585195796027	0.900027749620468	0.620519031153461	0.94958210913211	0.612338363891192	0.925927556354677	0.738577127116034	0.857045577142595	0.827217797223474	0.937236469378899	0.808006977321666
428	0.833856999387766	0.728036185501353	0.921095676323306	0.943648967986292	0.928539991221162	0.970812636710858	0.930001180433266	0.901177171255598	0.563572300202986	0.89883908758137	0.774900068069914	0.837140020162559	0.86172535690392	0.896086044503496	0.755524716884619	0.898470549490265	0.693970522615228	0.911255076084666	0.79731536708029	0.9482669708908	0.791279706072406	0.949561986429741	0.901426164347051	0.636894316850661	0.9501549582072	0.633847060022168	0.927157953672497	0.748068005869493	0.859228362332775	0.829375536089502	0.938006259353359	0.810110543041943
429	0.834423425778165	0.742342816235732	0.921941562102615	0.944538981875451	0.929557842217144	0.97179666385602	0.930964157650289	0.902780403140562	0.585243485189512	0.89533507520293	0.776546955823479	0.839958166414498	0.863730618515575	0.897881539511971	0.765926099909022	0.908152515406122	0.695896569445155	0.912661481324132	0.798782152136367	0.948815666541763	0.792674608591424	0.950604893145109	0.902675463301224	0.652526483909757	0.950919790620799	0.653660418556874	0.928405699146864	0.756721702834947	0.861465516267271	0.831607198376565	0.938858114341099	0.812383993394347
430	0.834704500757826	0.755535481740626	0.922957019044025	0.945442546389778	0.930717453723151	0.97273516225954	0.931860812682094	0.904288875201477	0.605969018355719	0.891675343741802	0.778126933303333	0.842693282174348	0.86584671623357	0.899681146409249	0.775054853336637	0.916404373031781	0.697877864015591	0.91413065786132	0.80044535795049	0.949565669937152	0.794017311984438	0.951656827875193	0.903863461088322	0.667400492619027	0.951793142227467	0.671652429272641	0.929583854543526	0.764638888883635	0.86370226557275	0.833847324700152	0.939741729122872	0.814576465092981
431	0.834808161196102	0.767262254544088	0.924056343371253	0.946345757469491	0.931906523770864	0.973599593806304	0.932697703275106	0.905652466190372	0.625679195746791	0.888316774774795	0.779725750347839	0.845030117868525	0.867697858689727	0.901090215067616	0.783307069062904	0.923832882497038	0.699835271580931	0.915595314452179	0.80210229624773	0.949999011312982	0.795386687311758	0.952672202207788	0.905002166439947	0.681489022819521	0.952757206351557	0.688218855766426	0.93080479341904	0.771792026185153	0.865887706860653	0.83603637588099	0.940615990990107	0.816754042151948
432	0.834959375446094	0.778089520133155	0.925138596534294	0.947215939126679	0.933018446507461	0.974366851375528	0.933316780503305	0.90684381213558	0.64438570593746	0.885580500705701	0.781651471324859	0.847337910798875	0.869765509544439	0.902533317282316	0.79061576858486	0.930615701419025	0.701608837356244	0.916986730123589	0.803368364245733	0.950210757431629	0.796724516708488	0.95360460385068	0.906068216614811	0.69472531346553	0.953701498753652	0.703331217675388	0.93182038704075	0.778167934272013	0.867959267845229	0.83811820892478	0.941450920320714	0.818956031537277
433	0.835234180449121	0.788114593522465	0.926183603922194	0.948040026011623	0.933941160302376	0.975007480595967	0.933660040177385	0.90785010695703	0.661923169657526	0.883866685169982	0.783326330511143	0.84952482568995	0.871640611444997	0.903922589913152	0.796989766520051	0.936285016988864	0.703244348984033	0.918246042786325	0.804628743310115	0.950412091054913	0.798130480583462	0.954402612522952	0.907087031920321	0.707083200023504	0.954556099040105	0.716728492812574	0.932800592535444	0.783790674271192	0.869868080461594	0.840045419100343	0.94220874701833	0.82105878956506
434	0.836201296190479	0.797254805998481	0.927121540831387	0.948804706891542	0.934586993930541	0.975509895793529	0.933752569354349	0.908662311983069	0.678244788733709	0.883527892294973	0.784925663940219	0.85173281109339	0.873445896537577	0.905311282667174	0.803112097429027	0.941136000019299	0.70506691173811	0.919332817437111	0.805997293429557	0.950948435202857	0.799291357515082	0.955046107873107	0.907984644462211	0.718508855901433	0.955302658804437	0.728523996866908	0.933941830421742	0.789313086674718	0.87156180032669	0.841780884895987	0.94285594336438	0.823066790145041
435	0.837387785581808	0.805162717680008	0.927882929697561	0.949501329978669	0.934899396029468	0.975870043808686	0.933650503806605	0.909295629719271	0.693258653919151	0.885114503260036	0.786315212179449	0.853744853437666	0.875369775540597	0.906388803822223	0.809642029665131	0.945639244667239	0.706879605546726	0.920222366354206	0.807391268370475	0.951563760782858	0.800359251187818	0.955514327470189	0.908847621341625	0.728977290861764	0.955911316785545	0.739393932656393	0.93500602028101	0.794409751764944	0.873015970444572	0.843301257297085	0.943375713224773	0.825036312635162
436	0.838216060905586	0.812415561888739	0.928476241750703	0.950128873569736	0.934843534238201	0.976085886094482	0.933425083056468	0.909772665444758	0.70693398042546	0.888938411469215	0.787582982826089	0.855569947947255	0.87748288559412	0.907395445989299	0.816405250328675	0.949641752517343	0.708497653291239	0.920913200843544	0.808781612729771	0.951952072561618	0.801410622619569	0.955821108184398	0.90961372222011	0.738433708163175	0.956397160892553	0.749546929956068	0.935825672444448	0.798370029331169	0.874212397151136	0.844591203089088	0.943755899118265	0.826958503871774
437	0.839074850723939	0.818508332036326	0.928904379750753	0.950681704034166	0.934439856094036	0.976183207066464	0.933206191519389	0.910132330379349	0.719303046018642	0.895138267801167	0.788892726732785	0.857295361935904	0.879860639529447	0.908347705542667	0.822531487287429	0.953234571204316	0.710155363114022	0.921414572380075	0.81003257838796	0.952303848593021	0.802410199233086	0.955986694841542	0.910325459484044	0.746863986089459	0.956771729709086	0.758811623458044	0.93652037031317	0.801760305632567	0.875157222047483	0.845662872925549	0.94400299151903	0.82873669572149
438	0.840003883596218	0.824152029870067	0.929218646570244	0.951161836820108	0.933722509493727	0.976180715409469	0.932928898919779	0.910419359062256	0.730307680320939	0.903398191957323	0.79017449865121	0.858910756094186	0.882193731411909	0.909150503463327	0.828749973406622	0.95682693237103	0.711882573789071	0.921749206754928	0.811286375469808	0.952734402271709	0.80336145720924	0.956029924340335	0.911019382872551	0.754307624564013	0.957066704717569	0.76717171422913	0.937047332247671	0.804667159708507	0.875865857491854	0.846546424408536	0.944122735765011	0.830637451307215
439	0.841303980661016	0.829398212309503	0.929432598241528	0.951585613915493	0.932734951883954	0.976096267743636	0.932536077561556	0.91068108751614	0.740068326963846	0.91306963650949	0.791319813794264	0.860642570889243	0.883984460916686	0.909878711911707	0.834292131871214	0.960339423336258	0.713572632981346	0.921950023478537	0.812852718171024	0.953135308317606	0.804284305882029	0.955978079665562	0.911676170991049	0.760809873333494	0.957257338832201	0.775011641936466	0.93753519562919	0.807320245462847	0.876370928857098	0.84727582177982	0.944136763330276	0.832370051900533
440	0.842189074450215	0.83414360016186	0.92953206878075	0.95197337956917	0.931566192899103	0.97596553951447	0.932239329873238	0.910965314973261	0.748768098764158	0.922830149233491	0.792438459160378	0.862340601388891	0.885966844423357	0.910244998295477	0.839367303451742	0.963465010676995	0.715122170129512	0.922063649917604	0.814500474386887	0.953633860933597	0.805198921984638	0.955882815474477	0.91237377191347	0.766493034898366	0.957398198226554	0.782208301250706	0.93812074512609	0.808776885461091	0.876716735529756	0.847893157685294	0.944077615177914	0.83388643639661
441	0.843240025983057	0.838236975518638	0.929563280360326	0.952337103619254	0.930312152222373	0.97582526367854	0.93198672447437	0.911307568720562	0.756543502925003	0.931074065242834	0.793558318405229	0.863866659095718	0.887907256448835	0.910596658575477	0.843803558669393	0.966926986109677	0.716633170986695	0.922130838459181	0.815902697282978	0.95415590458815	0.806258014199724	0.955793188448346	0.913064195225751	0.771521640665394	0.957499787228794	0.789127261340202	0.93885069426455	0.80952805468365	0.876941379342268	0.848452254414102	0.943971251638543	0.835373723373787
442	0.844214778257705	0.84210998048699	0.929575072673755	0.952690078886752	0.929047716353293	0.975705466054308	0.931856351878908	0.911745731988939	0.763593696210102	0.936561092245497	0.794497991657116	0.865596263283348	0.889806627296075	0.911223166362797	0.84776452912993	0.969840295267999	0.718129571012284	0.922193934276994	0.816896696721431	0.95501674756286	0.807133399443603	0.955747728939917	0.913794080330732	0.775980406064531	0.957588893572205	0.795432852225587	0.939260442853334	0.809873217015296	0.877083683634831	0.84899834759695	0.943844037758005	0.836814004898661
443	0.845078508807712	0.845684688902058	0.929701511927999	0.953052594912795	0.927851647160745	0.97562112189295	0.93195668635902	0.912305894848428	0.770016913896456	0.939153299792855	0.795372402677064	0.867311199068038	0.891323132798819	0.911841009157604	0.851332045953418	0.972515522873691	0.719795595769812	0.922302634098391	0.818220197873608	0.955948189819124	0.808047281319856	0.955786642601649	0.914562322362176	0.780001953617204	0.957690053540713	0.801402052991264	0.939763727986468	0.810817075497747	0.877193261663014	0.849582098603104	0.943730902955449	0.838327735827901
444	0.846092343243499	0.848909451981137	0.929889269945496	0.95344051021949	0.926811531696207	0.975606570519766	0.932348190383466	0.913001463823809	0.775958861549267	0.939278192056739	0.796877557727162	0.869018813731264	0.892850495863682	0.912452181080565	0.854872998406658	0.975188286526835	0.721357756452711	0.922498334358865	0.819441227506527	0.956836182482772	0.808900352660062	0.955941484153348	0.915340942401292	0.78363130880305	0.95788772245496	0.807395363717776	0.94041910797279	0.811420984339059	0.877315022556861	0.850244507455386	0.943664044863749	0.839965863743028
445	0.846652039884574	0.852201837943198	0.930192411427452	0.953869703827067	0.925999208427652	0.975677448997856	0.93295170797634	0.913833698547216	0.781487622397653	0.937499263443268	0.798457607289746	0.87071230631505	0.894442487919849	0.913195889666228	0.858298059376274	0.977562093056096	0.72284021764488	0.922816782189876	0.820531746054066	0.957518195878869	0.810026066633359	0.956248486597458	0.916169802946527	0.786963889170445	0.958186120260553	0.81352648526602	0.941011920257006	0.811324184199945	0.877491578068956	0.851021774070565	0.943675168361958	0.841712569927326
446	0.847046256040484	0.855549433665545	0.930638122154419	0.954351302793941	0.925465085522166	0.975845784022573	0.933711938355376	0.914788928261145	0.78675285444755	0.934208894189349	0.800251869227371	0.872231208101933	0.895765734515433	0.914181862941456	0.860841056003225	0.979559810209796	0.724348543899693	0.923279148013644	0.821519025681619	0.958321974741424	0.81125372105545	0.956723227005145	0.916978094846448	0.790057612383049	0.958628158670587	0.819336222878536	0.941593912283959	0.810960137097218	0.877743241912035	0.851939502031249	0.943787075531987	0.843631476381666
447	0.847977930773148	0.858452317712923	0.931276028993271	0.95488483859034	0.925242925327001	0.976123751738543	0.934711069491197	0.915850038934883	0.791765854842062	0.929788980869782	0.80191254811559	0.873719076395396	0.897219307860276	0.915132854508501	0.8628511496833	0.981680555259681	0.726046563618574	0.923892373170631	0.822369585586002	0.959462456352048	0.812385387803944	0.957353392305472	0.917828874102236	0.793044648094831	0.959190129330588	0.824551441870872	0.942032898725522	0.811211913705269	0.878082577795439	0.853014459809939	0.944012511833787	0.845387628358055
448	0.848678291792361	0.861877418836729	0.932106957979978	0.955478440251106	0.925314551638146	0.976502609527552	0.935818459083156	0.916996652496396	0.796632053937803	0.924401092999212	0.80342182854785	0.875038973698524	0.898209311936363	0.915995473774714	0.864300435203688	0.983673932039325	0.727722836574007	0.924663502001217	0.82332680768235	0.960468308247405	0.813547762166812	0.958133787252602	0.918740949532674	0.796006244203439	0.959831657537027	0.82955620615295	0.942514515226682	0.811958224240266	0.878522920501811	0.854247084770058	0.944354117239781	0.847049831863988
449	0.849261786963795	0.86461356883578	0.933087780548131	0.956133778606769	0.925667085157834	0.976973510487883	0.93700170515596	0.918205119650255	0.801480521049429	0.91817555463154	0.805199491179863	0.876331971855106	0.89898375996001	0.916902555028918	0.865286214711742	0.98508743186604	0.729154579956716	0.925597584805258	0.82455266974052	0.961190080584712	0.814745964758929	0.959043742819459	0.919653508649114	0.798982088685785	0.960550954501977	0.834627358547646	0.943084286077193	0.812624526418156	0.879074517352143	0.855637361368157	0.944816420238277	0.848499604791465
450	0.849249653380619	0.867034331064981	0.93419307291158	0.956834507953473	0.92628919290885	0.977532137756904	0.938430469911448	0.919445149250254	0.806230838695267	0.911668082520318	0.80676218283207	0.877568982467722	0.900055118396832	0.917860962447387	0.866474343622429	0.98594878215926	0.730599611039569	0.926685925419888	0.825801634495743	0.961672031997592	0.815885302896089	0.960080753791982	0.920587505566655	0.801991669732943	0.961336245654376	0.83920830828872	0.94356616206239	0.8132674733987	0.8797260172391	0.857172679903605	0.945385011983853	0.850092312012971
451	0.849600453561685	0.869349103083966	0.935454879677718	0.957574686259294	0.927149352435191	0.978171715182481	0.939909025915004	0.920695343579827	0.810904328993101	0.905830201304509	0.808381272068136	0.878599046784865	0.900954965707265	0.918972960022517	0.86750091901451	0.987120373482343	0.732071531528352	0.927918710385258	0.827094092360349	0.962072849328539	0.817068387541859	0.961216158916434	0.921536214046193	0.805025957433489	0.962134654544067	0.84363979479672	0.943974984947566	0.814941151923063	0.880470587682085	0.858845756709117	0.946049631500832	0.851725752527129
452	0.849753388864209	0.871627361152654	0.93681699279422	0.958347324699124	0.928211701356961	0.978873374024932	0.941522101968934	0.921953906494907	0.815495617773515	0.901290072720611	0.809885632819321	0.879793002633547	0.901647890944114	0.920028054991235	0.868402652302308	0.987928898207051	0.73346146164013	0.929301964418013	0.828555478193593	0.962300213734153	0.818125700067138	0.962428673663051	0.922513840710874	0.808016592991228	0.963020173065311	0.84782404484169	0.944050460339692	0.816728417293235	0.88130364391099	0.86064184333769	0.946807837172273	0.853148718284172
453	0.849949691857742	0.873793327047625	0.938274899892656	0.959152580197672	0.929453487946347	0.979635982191557	0.943105259747665	0.923215270617897	0.819920327051724	0.898025097468937	0.811459154797612	0.881112272899192	0.902443133586004	0.920848491350063	0.869128823077666	0.988814551873402	0.734895969429271	0.930821126315733	0.830483228864407	0.962424022264913	0.81934881574344	0.963701167952629	0.923522282451859	0.810978903788554	0.963980015182597	0.852133904893941	0.944346993953702	0.818515384488882	0.882218901046896	0.86255288366737	0.947646826607641	0.854458455652874
454	0.85008199205773	0.875633691645695	0.939738212704861	0.959980575253652	0.930847256599311	0.980462020991225	0.944650193965602	0.924481290556819	0.824163505301919	0.895831292322913	0.812744010579133	0.882332214492571	0.903315809927038	0.92160507464369	0.869900315880225	0.989297616399597	0.736029554096051	0.93246518310913	0.832275462346054	0.962340049793664	0.82045304266552	0.965008947724868	0.924573880179202	0.813926621922044	0.965033107164265	0.85605224619174	0.944365133605614	0.819603702819003	0.883213170419458	0.864566077261444	0.948549276169145	0.855573306740325
455	0.85010476691891	0.877476743768333	0.941327842252043	0.960822318146467	0.932366416213973	0.981339852131903	0.94612805602465	0.925762497903309	0.828269004929052	0.894491110025379	0.813035580501617	0.883458342323139	0.904331717980723	0.92240096361181	0.870640614820461	0.989659663875276	0.737244880093952	0.934223956401139	0.834088759947057	0.962386448955241	0.82153475167422	0.966347630700768	0.925701286494133	0.816899804560024	0.966144541516087	0.859639859826933	0.9442493463449	0.820975307710573	0.884274729609007	0.866673611449313	0.949507379280956	0.856635477268146
456	0.850427512888339	0.878941081723401	0.942954259383081	0.961667550995925	0.933997155306965	0.982269656241654	0.947549846511368	0.927078841580849	0.832172205964574	0.89326958200159	0.813448908155744	0.884402973505718	0.905336901221093	0.923175778001843	0.87110471096511	0.990285561518442	0.73848952484335	0.936082701613703	0.835949790001563	0.962712777533902	0.822506790427913	0.967699251943757	0.926902767649626	0.819881073379087	0.967279073434155	0.86290100778041	0.944158570550645	0.82284146256246	0.885397695385794	0.868867146109989	0.950513112443838	0.857596756844208
457	0.85072186956146	0.880385742890386	0.9446466642605	0.962509815409049	0.935747027535111	0.983256741380143	0.949030853790734	0.928458450939325	0.835810919340985	0.891183401231249	0.813734077020654	0.88557522774225	0.906894890071517	0.923622781843916	0.871655306772296	0.991239274449327	0.739765859590586	0.938041836136704	0.837581823378744	0.962884462064797	0.823354947439566	0.969075912937701	0.928233791075162	0.822898755369725	0.968421505268675	0.865794682728114	0.944074315055542	0.824692079810912	0.886587718290845	0.871146224048027	0.951569250252136	0.858331085702408
458	0.850721583210353	0.882008883940408	0.946337252175436	0.963351206079626	0.937629061407404	0.984304833729227	0.950378881691966	0.929927066267628	0.839279812638782	0.888133197526796	0.814139393769561	0.886761526300907	0.908523417520918	0.924059320996853	0.871890658138032	0.991801751288968	0.74087126653559	0.940109897006006	0.839300953829134	0.962912395958239	0.824167220800574	0.970483612394398	0.929630570801109	0.825855069167385	0.969561360822225	0.868706079524136	0.944204754981246	0.826081460402748	0.887859769240683	0.873519454495916	0.952678446907852	0.859300763301914
459	0.850793914191023	0.883089263997911	0.948030194665944	0.96419408671775	0.939666688685668	0.98541914043305	0.951610031206222	0.931498465550407	0.842529415224757	0.884975929755554	0.814380618557565	0.888325034435967	0.910489583303948	0.924541533679198	0.872438829454095	0.992172526037126	0.742010575956591	0.942270856012539	0.840993991865767	0.962994480894669	0.825026265690392	0.971931629203042	0.931072110187543	0.828768299818779	0.970769061497657	0.87153606315619	0.944379829289981	0.826490187083651	0.889206312042052	0.875988617193316	0.953837407016886	0.860362852868005
460	0.850883689552453	0.88440293160916	0.949764249662662	0.965034562241103	0.941867661093094	0.986598567349944	0.95283197715254	0.933173503867943	0.845634345730034	0.882244689463409	0.814092757631838	0.890091435816574	0.91251830447014	0.924963358843716	0.873144595386292	0.992391377027654	0.743267021063128	0.944512619870126	0.842309923010671	0.963135761889689	0.825875118971133	0.973441100758213	0.932648982631808	0.831694804355969	0.972047782679339	0.873619152040391	0.944408002792691	0.82654311565718	0.890617588536817	0.878547171552372	0.955047517744269	0.861439858817426
461	0.851473105262724	0.885788228391416	0.951610958010993	0.965880795514359	0.944234050112217	0.987836167300071	0.953992959026438	0.934954575391334	0.848694003539158	0.879364721332513	0.814110596510415	0.892046004969398	0.914906811466684	0.925470655904676	0.873896736023243	0.992562441608686	0.744466824464005	0.946822539436264	0.843211600176806	0.963348844029576	0.826659687033845	0.9750131818015	0.934305663299215	0.834631766732101	0.973476825833965	0.875440493599655	0.944569841874341	0.826646880276555	0.892094474277891	0.881197183819439	0.956312656154779	0.862369298094643
462	0.852227127993213	0.887323705781421	0.953527564909638	0.966730417057323	0.946764001708944	0.989120744585492	0.955101875023952	0.936833482587125	0.85165602706227	0.875704780947351	0.814156034602603	0.894173622297122	0.917484228663303	0.926146846110239	0.874898803250544	0.992053036015638	0.745644375115749	0.949179303752548	0.844044052688491	0.96377252295519	0.827726769456496	0.976662781518175	0.935959098351022	0.837579683608308	0.975046641663228	0.876952571393837	0.944738506604796	0.826552993135296	0.893626501506201	0.883924059979702	0.957622941539847	0.863426334733795
463	0.852944683648181	0.889135405157507	0.955506393270233	0.967587855433198	0.949443617826632	0.990449264157261	0.956152369401939	0.938780073347353	0.854479272166309	0.871583596166891	0.814353995308013	0.896021890618455	0.920400297362456	0.926692185515948	0.876059298618003	0.991027884459374	0.746944459987572	0.95155757489239	0.844430520419316	0.964129951649124	0.82874649125638	0.978384137177654	0.93764181556394	0.840534295310807	0.976667911317521	0.87792982992683	0.945103678991162	0.82637030235355	0.895210574358668	0.886717812816723	0.958964804912021	0.864700928217602
464	0.853894911098647	0.891471342298392	0.957522638505577	0.968450233875136	0.952249421478611	0.991796282971652	0.957332439905295	0.940762398122006	0.857201077291402	0.867881960925517	0.814916796989751	0.897668181841416	0.923728659350074	0.927463086524567	0.87794354632924	0.990188200177732	0.748275602109608	0.953936374711444	0.844784795487415	0.964545158355441	0.829797968341425	0.980161140751037	0.939301122662756	0.84347227668387	0.978307562360925	0.878498024036633	0.945415572321128	0.826438441403644	0.896832290324594	0.889557917018611	0.960330418112476	0.866242503209244
465	0.855045181282742	0.894215354579336	0.959582342390389	0.969311353301995	0.955113864219642	0.993121878104992	0.958527300745433	0.942714806370897	0.859885035358997	0.864850079752848	0.816166883756517	0.899282334016442	0.92735731545743	0.928299637039911	0.879726149219492	0.989651072865863	0.749899675983715	0.956261654894356	0.845122472864223	0.965240579029911	0.831019711727682	0.981954599969827	0.940895268589544	0.846363385213827	0.979951398124444	0.879008470039384	0.946201520322981	0.827161021514322	0.898445008702267	0.892393491451407	0.961684919086053	0.867871247044061
466	0.856144614056366	0.896858873681432	0.961586125403893	0.970152031990874	0.957945993162162	0.994378534629649	0.959717888194741	0.944568005913357	0.862532102604755	0.862418588484363	0.818210930966103	0.900936942493203	0.930966927826506	0.929238970055386	0.881527738682828	0.989277477233156	0.75181599426507	0.958465934349941	0.845363498086889	0.965696917496692	0.832217749607175	0.983706654499942	0.942388329915618	0.849200300354551	0.981592073972964	0.879226190024442	0.946971117491934	0.828114377864691	0.900007098930768	0.895161391119999	0.962979583922149	0.869454862814131
467	0.85685817362607	0.899435710970872	0.963574457688295	0.970949522946821	0.960632314247829	0.995508061263104	0.960986942928179	0.946246165482654	0.865228351113059	0.861399030888912	0.820426711461572	0.902692574979509	0.934290366107152	0.930013362918156	0.883656171902546	0.988390529527393	0.753505047270067	0.960481139847388	0.845469761587498	0.965664539763933	0.833307629542705	0.985345330199409	0.943748690411559	0.851981234174422	0.983196893326451	0.879051783334538	0.947583711633881	0.828691840298176	0.901470863330799	0.897788483223752	0.964157777299645	0.871030980777379
468	0.85766580035336	0.901851262299865	0.965403987566494	0.971680328418657	0.963038246764717	0.996443486304998	0.962276684354297	0.947666982223005	0.867906787950943	0.863036288251668	0.822930227467149	0.904476099837111	0.937177736164339	0.931012573901272	0.886073675697453	0.98702284829495	0.75506057501085	0.962225499990389	0.846129646179551	0.96569079430834	0.834671576852407	0.986773285844447	0.944826369843828	0.854564915389156	0.984674120637904	0.878961697150263	0.948065557274937	0.829580754155125	0.902788256034623	0.900193551636729	0.965158805855533	0.872806775376097
469	0.858533553096149	0.903957505844966	0.967060620463515	0.972312889020847	0.965026560132576	0.99712465187408	0.963535612789546	0.948749806019993	0.870544417338218	0.867251560503094	0.825327726720539	0.906255300678194	0.939789633923557	0.932096166724246	0.889038293417889	0.985924712143528	0.756763160585276	0.963617780778751	0.84675988061075	0.965827089720954	0.836113379806895	0.987907788770862	0.945622267258265	0.857012295044282	0.986010425591032	0.878500312112123	0.948563594485591	0.831207975242915	0.903899107269618	0.902304386549464	0.965928601276304	0.874535494009258
470	0.859623038331799	0.906148957743544	0.968416312059626	0.972820345373757	0.966484155318251	0.997499058935819	0.964777170628405	0.949425350699808	0.872979588011283	0.873018935245763	0.828234994488113	0.907462303373965	0.941812595293917	0.93326170061492	0.891761805225068	0.984925771827226	0.7584247322985	0.964613886432355	0.847357331319904	0.96628887089352	0.837445677024742	0.988659980560542	0.946100603018597	0.85921379004984	0.987092076784188	0.87759619889796	0.949036044837185	0.83359549592252	0.904759054870254	0.904088845534629	0.966424810704162	0.87618913661481
471	0.860567345072011	0.908296936680824	0.969392331894565	0.973186106425429	0.967305006823677	0.997534544018648	0.965898729502424	0.949649949052942	0.875066197473387	0.879933731368777	0.831669558678827	0.908556947377142	0.943579074384593	0.934497093837515	0.894221751753567	0.984082990824867	0.760111431782584	0.965183804947064	0.848212161092829	0.96716384781885	0.838797502329136	0.988958632761878	0.946141302836363	0.861019480268801	0.987864586895798	0.876758511897142	0.949463596413041	0.836528459128798	0.905331806457991	0.905527289601642	0.966600554026348	0.877855424642354
472	0.860999338603418	0.910288040294191	0.969853659016435	0.973395135992744	0.967388475460712	0.997207808719367	0.96676450546267	0.949407687119758	0.876764601818976	0.888288481365894	0.834946433910639	0.909429530711418	0.944444642215023	0.935528212844543	0.896267050714491	0.983551680162228	0.761843211097577	0.965334343426883	0.849491170952514	0.968173158193345	0.840250205242521	0.988742981175115	0.945790263182654	0.862370494740142	0.988193405644944	0.876109227816985	0.949702564716735	0.839221794522191	0.905601974303183	0.906602261506863	0.9664296838916	0.879556064088674
473	0.860883820253528	0.912052365385912	0.969829318503711	0.973445537909924	0.966660320183748	0.99650666130089	0.967379994489993	0.948718559542048	0.878055429276021	0.897855656703936	0.838189293176954	0.910074302863589	0.945205099200664	0.936244543341332	0.898292192263658	0.983249958608264	0.763466008740705	0.965094274811933	0.850428493591527	0.968860478850551	0.841089120357587	0.987989858620575	0.945191347797913	0.863305628444666	0.988109926327672	0.875239647251632	0.949816024225647	0.841372468544028	0.905585015597612	0.907326633984427	0.965905872996895	0.880875620372975
474	0.861184417517088	0.913306571478434	0.9693177635922	0.973330643124628	0.965071914130857	0.995438022223091	0.967700042722157	0.947642066702964	0.879032442688586	0.907603175237792	0.841525589300672	0.910981597023203	0.945708528052688	0.937258318337908	0.900346022726739	0.983520807107127	0.765112355816363	0.964497338483656	0.851770514339376	0.969790817894274	0.842204828897323	0.986732249956664	0.944363001406938	0.863857738837954	0.987603354988549	0.874672199822688	0.949911973567042	0.843785308104969	0.90531159695321	0.907728317852203	0.965038329005157	0.88225059835282
475	0.86129834540888	0.913648900002945	0.968316881330771	0.973054933801403	0.962611221586092	0.994033549012054	0.967434945738489	0.946270349066418	0.879714363275953	0.916453320593051	0.843952971776347	0.91188948723906	0.945715676240978	0.938108680668123	0.90156161181035	0.983344369973097	0.766744755461408	0.963609360944166	0.853069458569628	0.970580911636378	0.843294479613541	0.985041917481502	0.943382282503205	0.86404748516049	0.986745192634469	0.873968966223694	0.950000770529381	0.846336316319471	0.904844295841944	0.907857123099405	0.963844803362725	0.883319341762307
476	0.861297529831301	0.91362178199756	0.966754434781243	0.972646299369015	0.959353432578461	0.992352642589879	0.966809987199258	0.944759656350208	0.879974032319817	0.923995619428503	0.845505702122979	0.912695353022843	0.945177373478427	0.938822220727066	0.902904802110885	0.983009934617335	0.768210025971568	0.962548287203735	0.854541569668825	0.971372563515365	0.844181342499337	0.983058573243909	0.942391862345817	0.863931463690207	0.985566407271908	0.873094627673882	0.949644618243203	0.848342512960745	0.904292229690883	0.907823869301913	0.962389121837689	0.884442004993225
477	0.861165362910799	0.913639623329549	0.964708054701264	0.972143944043567	0.955405913230441	0.990471474999335	0.965881378944242	0.943270333915512	0.879822585090709	0.929668503873771	0.846458887206301	0.913525665157761	0.944371322585781	0.939321256619035	0.904055341983206	0.982448952441946	0.769395709725284	0.961455260457005	0.85631053466488	0.972350098697578	0.845081751180745	0.980949344904576	0.941463236060149	0.863500954451759	0.984099559553018	0.872312776184198	0.949104337969313	0.849912377266102	0.903771243099746	0.907741801085024	0.960749767049859	0.885489577679388
478	0.861071442142153	0.913749060817862	0.962267859625942	0.971587334754348	0.950918105815179	0.988465243228063	0.9646407295041	0.941965430445066	0.879273845256349	0.932546651915177	0.846838154867521	0.914279590470396	0.943935582805392	0.939862776607337	0.904521178563721	0.982403171545284	0.770849478799386	0.960464420240477	0.858248978154039	0.973622047582276	0.846098354976947	0.978898430822928	0.940720603733233	0.862813216556473	0.982469422370342	0.871538964313899	0.948585681901179	0.851537555656536	0.903389879459793	0.907724154419934	0.95901032592165	0.886591001333422
479	0.861126214310237	0.913853508329341	0.959649626460394	0.971010010440184	0.946067773204259	0.986414300185875	0.963033752133597	0.940980886892281	0.878426956955109	0.932663703903729	0.846364562439657	0.914746845710499	0.943593588253677	0.940327219636033	0.904549074013932	0.982576037888168	0.772432063282771	0.959686929998723	0.859882530010248	0.974921219286548	0.846949450226425	0.97707161390055	0.940449420622554	0.862080491478978	0.980822667022166	0.870770921466629	0.948167931678296	0.853173571335617	0.903216405434646	0.907889602242844	0.957238001247434	0.88775139701215
480	0.861315580564114	0.914530090305243	0.956858697270864	0.970460426604627	0.941045871679739	0.984376322997536	0.961406597001963	0.940408324303864	0.877283677348141	0.931176122209684	0.845863671073449	0.915262931104708	0.943138229163632	0.940769652661807	0.904277108186587	0.982265482772855	0.77394243223913	0.959209128402762	0.861697920580607	0.976166249810211	0.847887300346754	0.975585299639008	0.940692617106753	0.861284483365365	0.97920093818265	0.870266163401391	0.947540262893209	0.854508197626116	0.903281285098011	0.908329633170333	0.95548400637579	0.888936160416342
481	0.861392233565367	0.914893300531211	0.954085189616083	0.969973442219444	0.936031192593885	0.982407228088961	0.959662837403696	0.940295024435786	0.876123051501273	0.928973761069323	0.844876240443216	0.916158315953676	0.942982534901954	0.940984766250463	0.904268980990712	0.981936149098974	0.775276719527064	0.959069917081154	0.863693437883937	0.977177742705298	0.848936186474155	0.9744558125973	0.941371716873642	0.86047947271762	0.977599148377325	0.870201871194746	0.946762944306827	0.855837758756172	0.903589548195019	0.909078676350019	0.953805920817779	0.890240475997143
482	0.861759365163343	0.915206950731943	0.951435654469008	0.969572662313659	0.931200724335104	0.980548786537822	0.957825995599891	0.940684150008449	0.874950183462972	0.925863870306387	0.843450349174618	0.916788655530214	0.942779920061658	0.941193796365472	0.904349489446845	0.981817606298889	0.77640372800181	0.959234193079702	0.865438195435574	0.977799472184552	0.84993397088299	0.973737732482743	0.942528047486489	0.859787582203156	0.976012120462357	0.870388771717544	0.946240587688124	0.856810795317283	0.904161598550919	0.910107258939751	0.952264563816789	0.89167935176653
483	0.862368499738345	0.915679258853715	0.949058901475546	0.969272178245818	0.926732709158348	0.978834510302143	0.956055384350282	0.941568719607049	0.873879907636341	0.921585549671711	0.842237102516396	0.917127562171024	0.942957362838879	0.941569808510061	0.90447951448161	0.981501127142131	0.777500632524381	0.959648463017918	0.866839718636964	0.978258122049576	0.850811830171008	0.973465036096542	0.94412045936985	0.859300027034534	0.974563140327264	0.87045837634427	0.945906445314518	0.857841213922035	0.904973825815806	0.911363822305573	0.950893528993886	0.893181494680007
484	0.863333353761629	0.91621056902781	0.946972337059652	0.969079050080611	0.922780472458946	0.977284767228946	0.954502719923836	0.942875465638841	0.873145630709038	0.916911734047704	0.840850623140387	0.917559737982035	0.943067563530746	0.942103993890794	0.904109274959926	0.981391731069392	0.778703178917648	0.960226453247923	0.868447548366787	0.978839367770232	0.852105338149528	0.973600739610278	0.945988536927519	0.85893599520303	0.973287327869206	0.871092410415987	0.945738238356568	0.859426085345471	0.905955813706809	0.912789235140763	0.949708199094006	0.89493854917907
485	0.864116048574913	0.916930873049714	0.945215611514142	0.969000120026785	0.919492969250786	0.975901667861762	0.953265297867147	0.944487477936571	0.872653498963361	0.912776974152131	0.839241452293589	0.918140771614544	0.943680412093674	0.942360091207058	0.904307539219573	0.981276705732126	0.779666520385676	0.960880926992608	0.869977627512569	0.979254828554517	0.853106866468035	0.974033350245555	0.947977471065571	0.858743393614901	0.972266739923756	0.871793752810495	0.945730988457106	0.86122154180631	0.907005403364445	0.914309852542486	0.948712658086791	0.896590020123371
486	0.864813394152194	0.917828912260663	0.9438575222742	0.969042752688855	0.916964254845866	0.97468231260501	0.952477556262	0.946256088503318	0.872363552623494	0.909172083997603	0.838534719593437	0.918724350832112	0.944420247050844	0.942503398773602	0.904686207567797	0.981628654477896	0.780382865647422	0.961514470897509	0.871316917039706	0.979928760524194	0.853997931403567	0.974607948774594	0.949948750148669	0.858698018033772	0.971435512562053	0.873110475456099	0.945605111325484	0.862358558438187	0.908007697347565	0.915839105483264	0.947908966784892	0.898463001976516
487	0.865517743324092	0.9187180993265	0.943036492506344	0.969203301433875	0.915246565294943	0.973633911933147	0.952078097069369	0.948037022262624	0.872469107228243	0.906055316209481	0.838475697309309	0.919411115270219	0.945731909313189	0.942746210535556	0.904932907450646	0.981993737438663	0.781109465379149	0.962016017437085	0.872575683586172	0.98062017675765	0.855011113325831	0.975175972697527	0.951723753039482	0.85871097992266	0.970803625601933	0.874747699675579	0.945895715972531	0.863515147661142	0.908870032689406	0.917251336603282	0.947302531576405	0.900178105648708
488	0.866532133187872	0.919465188839261	0.942743610082649	0.969469105075886	0.914386195519216	0.97278062277683	0.951960223321747	0.949734234187717	0.872825901565751	0.904012641159168	0.83869655115658	0.92005494877224	0.947248309988465	0.942958720268714	0.905192755535355	0.982623827975481	0.781657661310619	0.962270280610642	0.873370699645217	0.98127174064754	0.856051601187469	0.975654747703511	0.953254213168016	0.858878859816842	0.970366686358941	0.876549830404057	0.946344892229573	0.864474507989153	0.909564268288711	0.918446915296578	0.946913972810792	0.902065887691501
489	0.867768066903023	0.920414574136266	0.942923035670618	0.969839323404669	0.914389546218825	0.972129956773635	0.952084143809094	0.951248479842967	0.873558721014909	0.903355427317859	0.839271455653758	0.920760730756725	0.948722766858959	0.943180506428795	0.905909816122046	0.983189546441774	0.781956625507416	0.962253785892894	0.873919860176781	0.981942296564803	0.857108997437702	0.975977584705364	0.954480567128096	0.859199764975845	0.970061846580612	0.878544075056432	0.94686945758669	0.865790289880363	0.910027871599451	0.919353044754472	0.946734849745996	0.903937716660117
490	0.868874887022932	0.921345761943284	0.943476632461176	0.970312197267726	0.915227719332499	0.971697547068985	0.952539924889521	0.952501657658803	0.874622831183992	0.902940106075921	0.841148673564224	0.921710944755683	0.95050775599854	0.943476729549956	0.906777883253324	0.983701886563873	0.782009276163813	0.961974094472022	0.874227907167037	0.982344935738165	0.858079456904459	0.976042890965741	0.955170806644041	0.859609492030961	0.96987125706131	0.880188743961091	0.947315411608197	0.866957488695056	0.910246006573378	0.919976878183753	0.946777448328683	0.905463257360996
491	0.869844531276119	0.921600960065901	0.944486076477034	0.970871277679634	0.916841852723478	0.97153288980802	0.953059414757942	0.953504004321778	0.876015126432067	0.901248305878055	0.843167066543933	0.922660373015357	0.952765880158232	0.943680305104494	0.907743667947403	0.984760058283972	0.782081488705503	0.961464089937083	0.874244363726027	0.982456476661401	0.858915091053784	0.975860205364022	0.95535426910805	0.86018145271395	0.969786541474223	0.881665296796439	0.947939226936768	0.868254306686472	0.910292719240349	0.920310289590495	0.947086556003099	0.906684015408759
492	0.870780596335479	0.922583904481892	0.945932493898346	0.971506364693687	0.919159763230473	0.971663295023509	0.953860155841859	0.954329967652624	0.877753674363219	0.897851997970369	0.845430631639741	0.923679626748864	0.955569570546322	0.944066146283574	0.908530305571768	0.98576545187938	0.782220414456209	0.960795389222363	0.874044490503016	0.982511700966713	0.859660277369845	0.97562333934855	0.955277748556118	0.860993094805628	0.970019399170873	0.882827455431549	0.948616691691574	0.869113884784074	0.910279702539225	0.920354481032561	0.947670063899261	0.907748325879208
493	0.871578199728593	0.92375196642145	0.94778021770816	0.972212921888466	0.922091722728584	0.97210525254869	0.954980681353973	0.955010627212971	0.879924681059819	0.893542267217608	0.847950958199163	0.925029930778417	0.959149215567164	0.944459652995057	0.909239920997993	0.986574427688168	0.782468496592675	0.960117782138551	0.874067791929341	0.982617990598585	0.860455710726374	0.975393328215023	0.95497992105835	0.862027071241595	0.970692041599907	0.884308953158203	0.949268267689708	0.870312763805782	0.910251765386132	0.920196318072678	0.948523592124612	0.908660296865354
494	0.872621830601438	0.924938212749198	0.949909644198988	0.972991217902522	0.92554240973319	0.972867226057028	0.956383435933116	0.955607416858134	0.882301296610895	0.889105637881531	0.850902592262334	0.926817595828124	0.96290422943052	0.944696245844216	0.910278703679314	0.987407317021636	0.782714542471901	0.959533751226513	0.874647033908661	0.982890738025392	0.861448166559032	0.975242931083185	0.954513855069788	0.863265764144859	0.971713893647127	0.886250847878639	0.949820607234952	0.871757638310193	0.910280918623041	0.919959428673718	0.949651322647246	0.909501222800227
495	0.873468472494858	0.925805737577893	0.952260620075455	0.973828894343122	0.929395260249567	0.973954531318046	0.957961977531497	0.95621417171219	0.884670084466845	0.884792423134757	0.854249264549267	0.928780810441645	0.966443024150554	0.94495951099055	0.911672155545824	0.98816624070264	0.782955533790401	0.959155712732552	0.875360201073221	0.983090147655022	0.862365436272829	0.975276157379388	0.953962857733999	0.864795733615287	0.972993116449093	0.888323227152033	0.95027008466782	0.872907520624924	0.910462058602777	0.919730244700518	0.951052445424067	0.910437895797571
496	0.874025719831094	0.926799430435609	0.954829900649099	0.974706455034829	0.933506910654582	0.975356317916971	0.959531454208176	0.956926063672197	0.887054365840475	0.880780494235932	0.858002967459663	0.930429817458637	0.969177022315337	0.945480616412686	0.912170413719727	0.988808986602867	0.783306854803324	0.959061633407534	0.876053733095311	0.983442353674306	0.86339446264869	0.975646023460044	0.953484143508316	0.866521381135768	0.974475318404683	0.890541555103066	0.950519903377111	0.873659340871475	0.910889250610385	0.919579800909909	0.952706186679824	0.911438627131579
497	0.874852631423822	0.928039316717743	0.957520949107401	0.975595457438545	0.937765660070418	0.9770379846444	0.961197295530277	0.957828146273583	0.889498019948833	0.877609006750919	0.861285264312797	0.932047280403248	0.971377657671164	0.94624825495349	0.912863711465624	0.989201495586082	0.783869646413815	0.95930518039876	0.87697852153887	0.983551468537304	0.864363227198792	0.976491181705333	0.953187762136603	0.868473507758147	0.976179901867338	0.892374102920341	0.950962848450078	0.874965478402834	0.911625325144152	0.919570346866847	0.954576958539409	0.912263526025185
498	0.875763887187241	0.929289161719602	0.960223947342768	0.976469286107005	0.942050570182967	0.978920030981248	0.962729248102799	0.958922157032149	0.891864789210051	0.875403417208487	0.864603894473158	0.93360619166197	0.972917483366695	0.946894477473482	0.913516805143019	0.9896620066438	0.784528775536786	0.959912202346797	0.877725898049114	0.983386026563918	0.865160461018366	0.977847833854684	0.953192470862946	0.870733130124776	0.978019637018946	0.894281305193555	0.950994429923816	0.876126930811921	0.912648375929279	0.919773956862453	0.956579084068284	0.913233415415873
499	0.876521868498607	0.930608406328349	0.962850787663515	0.977316080707271	0.946230655248577	0.980881135714295	0.964227519311926	0.960114271895437	0.894288133265808	0.873746605827858	0.867755956721101	0.934965277184574	0.974320956203115	0.94760995891249	0.914358229803252	0.989773302676067	0.785431507099189	0.960908847079474	0.878917366431571	0.983065629137967	0.865927883384278	0.97956500868308	0.953455847622932	0.873092503445148	0.979949102233704	0.896373120948943	0.951131138984939	0.877673846982949	0.913797264344131	0.920249151190695	0.958592157539851	0.91411257960844
500	0.877255474871983	0.93182006562096	0.965409878295129	0.978113666517055	0.950187187132236	0.982861225777987	0.965653333531756	0.961339535527456	0.896535297525813	0.872447764451092	0.870727879920133	0.936421167301025	0.975489902889297	0.948316503883979	0.915204796660362	0.989763477575638	0.786441720087485	0.962174420115211	0.880284026403866	0.982465825274512	0.866668145912928	0.981470483745669	0.953892728849599	0.875495218121939	0.981886496035901	0.898651683170961	0.951138587086639	0.879081613235161	0.915015810405046	0.92102759869474	0.960559009523088	0.915055338062603
501	0.878102002531184	0.933364078604656	0.967813921564624	0.978846250859293	0.953823072335254	0.984791036826225	0.966956533768305	0.962580310301164	0.898682843092061	0.871980085942901	0.872343962375791	0.937591203584657	0.976058110381182	0.949007523741046	0.916167608811172	0.989887314407359	0.787659636868718	0.963604971765334	0.881828703225599	0.982233135922169	0.867464395292261	0.98354020757517	0.954600495192379	0.877908829133797	0.983740311850965	0.901422045412324	0.951242938706172	0.880527399449997	0.916270621450967	0.921988118389232	0.962423047027934	0.916250181629671
502	0.879068044968695	0.935575099314452	0.970008973507022	0.979505052898029	0.957059461385277	0.98658737134866	0.968218911624793	0.963777712585486	0.900802714394703	0.872582532277043	0.87378221006882	0.938553211518533	0.975685818895183	0.949697402956887	0.91712850648253	0.989656664064998	0.788725376496764	0.965107470813623	0.883342533960346	0.982265438193083	0.868371587879643	0.985688647518566	0.955497969310423	0.88017521333298	0.985538280602233	0.904457139140136	0.951143516772058	0.881327355907603	0.917492970268083	0.923068455157895	0.964114739942291	0.917704580392534
503	0.879966885968176	0.937398691355713	0.971885027012043	0.98008199907085	0.959836564128188	0.988188790882794	0.969384869714575	0.964858185635981	0.902583434907778	0.873795193321872	0.875211643391126	0.939494737800229	0.974671638045475	0.950387948928432	0.917878768324014	0.989496844405101	0.789801532434427	0.966592537677721	0.884430889268253	0.982267512637123	0.869321667299883	0.987741881560035	0.956362957266873	0.88218218624028	0.987108662432392	0.907747384728616	0.951157483683699	0.882352936702778	0.918595711675396	0.924228693358825	0.965595237873681	0.919289737341929
504	0.880997983338709	0.938627180883151	0.973404545783698	0.980577768347211	0.962128153845151	0.989551694092077	0.970266715210717	0.965785734366128	0.903923424966935	0.875092754659464	0.876781246513305	0.940336843821381	0.973022789987393	0.951066612113754	0.918926264967112	0.989470029819492	0.7910210306685	0.967958383568563	0.885101001859267	0.982208809463999	0.870244180275948	0.989623439524875	0.957166405478204	0.883908520300303	0.9883561195474	0.910592072048352	0.950973996849354	0.883253728748536	0.919548743569933	0.925406924774084	0.966838141424948	0.920950112608519
505	0.881587824952305	0.939351074043967	0.974628658202203	0.980977661115874	0.96390316900441	0.990644067074913	0.970845353712237	0.966512748764016	0.905048723120314	0.876364564866148	0.877626526943562	0.940975457733945	0.971436161195118	0.951757140523795	0.919943984334758	0.98937351051466	0.792333150203252	0.96914342804034	0.88514866734643	0.98205567405089	0.871001677240217	0.991273762091298	0.957901099601759	0.885350582996646	0.989294069126204	0.913317869804043	0.9508499187085	0.88389371566925	0.920315057311689	0.926532380564264	0.96782085574814	0.922685878074038
506	0.882190551661564	0.940240039885239	0.975556468409912	0.981287298419594	0.965176329524197	0.991442392249842	0.971150101051151	0.967000599690615	0.90603478542398	0.877649836578974	0.878062094828344	0.94133799396044	0.970408051518097	0.952369314396792	0.920586797994737	0.989205601131614	0.793750286955926	0.970087025188525	0.885118613858847	0.982013057732047	0.871717385376845	0.992637210461103	0.958569860185263	0.886488027226714	0.989941362899876	0.915676275223005	0.950714013178841	0.88440821448575	0.920863332610872	0.927559006166477	0.968533268319311	0.924136721861263
507	0.883151774846343	0.940699680528775	0.976173446703067	0.981521374336833	0.965980901447535	0.99194346797353	0.971272019140759	0.967229173053949	0.906887769973094	0.879012628072817	0.877645341786199	0.941684070197698	0.969858242879625	0.952832889111903	0.921426851514683	0.988938666012418	0.795166325865778	0.970768255103726	0.885102453026767	0.98184132580163	0.872502717006941	0.993626507213282	0.959088068770477	0.887386353240596	0.990343261131963	0.917651802158111	0.950666795168414	0.884723106624073	0.921173182932576	0.928454435256956	0.968988655944697	0.925496941995116
508	0.883904786084518	0.94152274012343	0.976531621894572	0.981695458798268	0.966347794510677	0.992160468895326	0.971304914804481	0.96719802078075	0.907566336825035	0.880700494814103	0.87689837081148	0.942068926418395	0.970363372157271	0.953266511839834	0.921816606809678	0.988641005502417	0.796385323926961	0.971181419911322	0.884606433787471	0.981818752552279	0.87341846198842	0.994186145855753	0.959461673466255	0.888059723731587	0.990490837297082	0.919435419807705	0.950472204239761	0.884800239817463	0.921253364385832	0.929201162169016	0.969210921805474	0.927168112550087
509	0.884566634312743	0.942503398050262	0.976702881741459	0.981816169726413	0.966311825138202	0.992130018178118	0.971478463117804	0.966942038501438	0.90809012574781	0.883198841234911	0.875283447651682	0.942777548780332	0.971011116510603	0.953975930868735	0.922517472926782	0.988501984809076	0.797280372742495	0.971336338176865	0.883959326895872	0.981874521388442	0.874414375957385	0.994325232978042	0.959602624688067	0.888444455456312	0.990449018305748	0.92080238302602	0.950616381178367	0.885328310477143	0.921133339224496	0.929772458712229	0.969247520260956	0.92891489815584
510	0.885189202499713	0.943688673339211	0.976763811117808	0.981873819945756	0.965898188998053	0.991897025662523	0.971723971402484	0.966534048081318	0.908559982693559	0.886895828181463	0.874190507348354	0.943768741637026	0.971458040173507	0.954888444020037	0.923135082920917	0.988570591700349	0.798050830312534	0.971221041253719	0.882767348178616	0.98193916422339	0.875385706188812	0.994150510784881	0.959548461670376	0.888630434252453	0.990205423277718	0.921352054932453	0.950791027282158	0.885940932589423	0.920916799112288	0.930129794647722	0.969154801517385	0.930695335150188
511	0.885735681508007	0.944757692784901	0.976633627850922	0.981864885187359	0.965132786991519	0.991471947641575	0.971889205462581	0.966010250232256	0.908978211538452	0.891630595491423	0.873402490050272	0.944608572453293	0.97175419483289	0.955924544295423	0.923716808291925	0.988558966860866	0.798851720480012	0.970887315761864	0.881699831533432	0.982188714358805	0.876283891620604	0.993757377706661	0.959339436849952	0.888608892982061	0.989847057682681	0.92136887754556	0.951283942564521	0.886374866840862	0.920643823513699	0.930248072733774	0.968946925287538	0.932245083798843
512	0.886096324104769	0.945364576673935	0.976382226333891	0.981795243544948	0.964032743891091	0.990869146992383	0.971978436224678	0.965368179209574	0.909279808882189	0.896647366034768	0.873303003937908	0.945666629127736	0.971949094975706	0.956925127474248	0.924114648702625	0.988774874127804	0.79974313065941	0.970363233640892	0.880861274482592	0.98213573116586	0.877261193084128	0.993159705022159	0.958898242506453	0.888360815083041	0.989432466171883	0.921046599523709	0.951821449406587	0.886509357970164	0.920313828663143	0.930164345684274	0.968632486338752	0.933605631159253
513	0.886390198000463	0.945451936733734	0.975974061026049	0.981664312606233	0.962621333047691	0.990093277614194	0.971977678083794	0.96460282477942	0.909315026077335	0.901421482780254	0.873053132138893	0.946851855430596	0.973017282708195	0.95800883310885	0.924430688627625	0.989464090699004	0.800706542526819	0.969662912977205	0.880268665666685	0.981920963804209	0.877943960158924	0.992355988878452	0.958222206849293	0.888014626138981	0.988834298322921	0.920397130820984	0.952354621205148	0.886785866915078	0.919921981425496	0.929878618180716	0.968211873729966	0.934953710817507
514	0.886856216605198	0.945683680534575	0.975422528602236	0.981469856460321	0.960915042364256	0.989156247112114	0.971732591750207	0.963694614594664	0.909360256247341	0.906170034694243	0.872601977995582	0.947728843008413	0.974002104682501	0.958993651746955	0.925107758239798	0.990333528324793	0.802009497023803	0.968784581856099	0.880408035491547	0.98178981659002	0.878487302771015	0.991359431081885	0.95739400979003	0.887624311285435	0.988092538169303	0.919665557045594	0.952894911636648	0.887382880946309	0.919464776005757	0.929398178607757	0.967680866367611	0.936267852169476
515	0.887177215214992	0.946853950503116	0.974703197470278	0.981193903552253	0.958907187670082	0.988053441649677	0.971624659745459	0.962620112004273	0.909482595573624	0.911056805053762	0.871978450182856	0.948650289254787	0.974781781762579	0.959934065358689	0.925735971180191	0.99104059990603	0.803270543390817	0.967718699558789	0.880788057174607	0.981901355028823	0.878840902741619	0.990141664392313	0.956446431937116	0.887185111232966	0.987233381510704	0.918947498419651	0.953510634951867	0.887780000944477	0.918914208409904	0.928736391228639	0.967034153811875	0.937394466647633
516	0.887967383351833	0.948893481514111	0.973831455337419	0.980850468590595	0.956620594406407	0.986786211271788	0.971474865462007	0.961372930296224	0.90953702704316	0.915828841627222	0.871060548165546	0.949747905961804	0.975118997939776	0.960961817949014	0.92646364211925	0.991762260646108	0.80449366267625	0.966456122815941	0.881075445571571	0.981903318705587	0.879118790249167	0.988669642388224	0.955373322281493	0.886671294709232	0.986276176684103	0.917651782997951	0.954107845695139	0.887947960266744	0.918257405103224	0.927898491382401	0.966266447820273	0.938333667802304
517	0.888858095094116	0.951056141088231	0.972868702128974	0.980454481592784	0.954052598922099	0.985362952664816	0.971141207789162	0.959945810781544	0.909384666300964	0.920102444254686	0.8704728053313	0.951007015399988	0.974945091386009	0.961966178661583	0.927597372567976	0.992469919942276	0.805501158030285	0.964999932466088	0.881099183245633	0.981798016136866	0.87938710741734	0.986922579528421	0.954134385738018	0.886051673505742	0.98525567536908	0.915936920708741	0.954801896294084	0.888268454833325	0.917481664474259	0.926904889616478	0.965369671978961	0.939376375035249
518	0.889893767101702	0.95362660202007	0.971791254976564	0.980007865907367	0.95120095386315	0.983790056874083	0.970722032523842	0.958342139273228	0.909071587897239	0.923443075890942	0.870552813023244	0.952284843768275	0.974638657440933	0.962985724617017	0.929321972577155	0.993536595458521	0.806541979575722	0.963347592630812	0.880859070481269	0.981835836925359	0.879610631014716	0.984918398536608	0.952782472984133	0.88528628093793	0.984121449428052	0.914268447714219	0.955488905061514	0.889476448744592	0.916576179664965	0.92578466016878	0.964329503750092	0.940453075432512
519	0.891034213292866	0.955497128456686	0.97058753460372	0.979509159035505	0.94806504486607	0.98207193909032	0.970085450299673	0.956566032894589	0.908695152568525	0.925329110124186	0.871126460197605	0.953563984612126	0.973236013274897	0.963814505005004	0.931269997085089	0.994631144219588	0.807852179594209	0.961497668317597	0.881153075478125	0.98168024369139	0.879755827292501	0.98268200188709	0.951329799699583	0.88433535038072	0.982879815105633	0.912717842278119	0.956260113403548	0.890565514391197	0.915522391828905	0.924563736721123	0.963149275649223	0.940931427075115
520	0.892103365706516	0.956951689008827	0.969236283054864	0.978963368970049	0.944666463246261	0.980223202008272	0.969062927611527	0.954641624349771	0.908149000916785	0.925199805564917	0.872140049803494	0.954273255837958	0.972356532793023	0.96441679464298	0.932558823597725	0.995306150949587	0.80944947232099	0.959444100980228	0.881830122172328	0.981608877421025	0.880021627608754	0.980217187079952	0.949880898436676	0.883231639268995	0.981530174648334	0.911481158058141	0.956760103648946	0.89123846935604	0.914339179624905	0.923282509115938	0.961833563655565	0.940992182565528
521	0.893380994217714	0.957790359015997	0.967635592993759	0.978399009122676	0.941054062837243	0.978269657541847	0.967758166464427	0.952613221079387	0.907306821461009	0.922895796062265	0.87260583940773	0.954896055288366	0.972059726238505	0.964738924493495	0.93347840873033	0.996043740676722	0.811159098663082	0.957220468597252	0.883259930200365	0.981815466201365	0.880254668518355	0.977556917539773	0.948437338085091	0.882002452569848	0.980047594134792	0.911115538186415	0.957030325905954	0.891649068688308	0.913052727411646	0.922000969946327	0.960401046485236	0.940855938860219
522	0.894823342869729	0.958181417484189	0.965858879271086	0.977844551161191	0.937295267641652	0.976238754007794	0.966545894254827	0.950554080995085	0.906269116058497	0.918739311008226	0.872638449301655	0.955361796600581	0.972227117999191	0.964877267157793	0.934000747287606	0.99704367597699	0.812831409759519	0.95486396144097	0.884542620772734	0.982077082641442	0.880569503849016	0.974764129239977	0.94702502237539	0.880685388969594	0.978456167398073	0.911404668025535	0.957029071512445	0.891991868554932	0.911701415559996	0.920776897390575	0.958882573051963	0.940844246671909
523	0.896387372462506	0.95829362472213	0.963963771253223	0.97731245457663	0.93346925054267	0.974165721171692	0.965290296134381	0.948540592213343	0.905062482751494	0.913515433758696	0.872545674688713	0.955652550132696	0.973140442589626	0.96502326851086	0.934494242075941	0.997368750323611	0.814274695221908	0.952427130759633	0.885484388960911	0.982614581077292	0.880742363357569	0.971898578482291	0.945775938085208	0.87932061276204	0.976698558068092	0.912009951715228	0.95685565084471	0.893018995220649	0.910339621454462	0.919680851528889	0.957314793592466	0.940971704432093
524	0.897891875217441	0.958272475713932	0.961966938373492	0.976806092815017	0.929653401761137	0.972101835988873	0.963995008423453	0.946649524541294	0.903793007736777	0.908295512164192	0.873150968265057	0.955884551007645	0.973691609995639	0.964990077391356	0.934958070343833	0.996916787747499	0.815929051935814	0.949967475003955	0.886114514095942	0.983153148550876	0.881212745609019	0.969041546752821	0.944758589446173	0.877948920576449	0.97488840610722	0.91295050426024	0.956923708747085	0.894337541403101	0.90901268050073	0.918780091430713	0.955739664350933	0.94091333230749
525	0.899459477067432	0.957708530473902	0.959924135317274	0.976344167674514	0.925938316007353	0.970085487080944	0.962934549761229	0.944965057209116	0.902398256432672	0.903647625855113	0.873721854212512	0.956051357342804	0.974216189841197	0.965011122988932	0.935327329655628	0.995931180015308	0.817128322121303	0.947546386293233	0.886103386420472	0.983651023548542	0.881767781089877	0.966264447860129	0.943980951684945	0.87661445281045	0.973079748838313	0.913982512369283	0.956895200841016	0.895225843431301	0.907780231073032	0.918108449871643	0.954199603966828	0.94066300193689
526	0.901114325798776	0.95630811380499	0.95805055159389	0.975960089891894	0.922438865334121	0.968162467743455	0.961807565418985	0.943561393127707	0.900984112794348	0.899552862183912	0.87403306863736	0.955959747528629	0.974848621274534	0.965087662913657	0.935547367863912	0.995013364047864	0.818339469104151	0.945220430170435	0.886280513123858	0.984143892302028	0.882727541680086	0.963645483920724	0.943381148877203	0.875332298707812	0.971353018998925	0.915124189583704	0.956903670218306	0.896019108865382	0.906725271498303	0.917648422260188	0.952734198104235	0.940542152526352
527	0.902563586111362	0.954040991244882	0.956296934532092	0.975657064174537	0.919230508473718	0.966361514998999	0.96080236006988	0.942489735690955	0.899556746479292	0.895869068842344	0.874887474491294	0.95555679402585	0.975579640410393	0.965244402073046	0.935259800040823	0.99441484150166	0.819467991928984	0.943052300019182	0.886905875722564	0.984874771910717	0.883859557215799	0.961264360157544	0.942937281368452	0.874188713649227	0.969734767732494	0.916533667860369	0.956871316743046	0.897022337957304	0.905924935659474	0.917370928184581	0.951376587040698	0.9405712484498
528	0.903979671643681	0.951943372181539	0.95462230766841	0.975421894984466	0.91639720962904	0.96469869712228	0.96012174993987	0.941783207282329	0.898388235220306	0.892572124868994	0.875348682939402	0.955174343486847	0.976394777384366	0.965551113993542	0.934874910208539	0.993993601435397	0.820678217447806	0.941089111958346	0.887856022655746	0.985740545670099	0.884899199618805	0.959170044084849	0.942689639551566	0.873189217389448	0.968266416246826	0.91856547994118	0.956560365208944	0.898228537159117	0.905437513797018	0.917243540467435	0.950158409705611	0.94043392720749
529	0.90499543907839	0.94958728647416	0.953126906461096	0.975257884255842	0.914024920106244	0.963186841731619	0.95977600890395	0.941442882068901	0.897446689195564	0.889708364751277	0.875495581516329	0.954847360963155	0.977068557865396	0.965834982609791	0.93348710211958	0.993172136144942	0.821846629681344	0.939377393657332	0.888993538302592	0.986399552476289	0.885732739144413	0.957380728115492	0.942621878673996	0.872391055944617	0.966955670214474	0.920878791399868	0.956134633934468	0.898557550279023	0.905319441435089	0.917227934311553	0.949120646011763	0.940111895402235
530	0.9060487413691	0.947436196407678	0.951776427739715	0.975172373516345	0.912193273707484	0.961843580754267	0.95948873568753	0.941450926558138	0.896581784085908	0.887143113121752	0.875746368807688	0.954401334085003	0.978490152484514	0.96636292872066	0.932414038671856	0.992451592071403	0.822701581109471	0.937954443902614	0.889776158955593	0.987042363718127	0.886674822355117	0.955902323558716	0.942625161164705	0.871878453255614	0.965846762034557	0.923371324801379	0.955644617644349	0.899325041386682	0.905641624289826	0.917284604992584	0.948275704586913	0.940183386762545
531	0.907135429970583	0.945707095587778	0.950530175288032	0.975179830428736	0.910954317395319	0.960668162773151	0.959298496209218	0.941782053583799	0.895995493784245	0.884881600944256	0.876760664713225	0.954435554550537	0.979473748797489	0.966890160837917	0.931887282220306	0.992041257766294	0.823459319431919	0.936872072597205	0.890498879006135	0.987759303769469	0.887602847248898	0.954765162910841	0.942569389663884	0.871684558809541	0.964955263756506	0.925761595952598	0.955143553508811	0.900568316030602	0.906462725492281	0.917366956059511	0.947633952382827	0.940451173155384
532	0.908254058322209	0.945000097739058	0.949564060777359	0.975279136031761	0.910349786972904	0.959660785355344	0.959173208817848	0.942394298137411	0.895774422891974	0.883184011594953	0.87801976982123	0.954373114214386	0.979815682791295	0.967699532774092	0.93181871924368	0.991220534225858	0.8242404444574	0.936159404878158	0.890492584736686	0.988069136626855	0.88873356016471	0.953946681998844	0.942503191272923	0.871839037141605	0.964388087012615	0.92765254173025	0.954651229639605	0.901632534161542	0.907822352048941	0.917427157798002	0.947206744481973	0.940823901768111
533	0.909107190209583	0.944861090589918	0.948875243767201	0.975464039708527	0.910395462573019	0.958814293029507	0.959033929377403	0.943229801625685	0.895787618744108	0.881996461112809	0.879592103519337	0.954699050920228	0.980021364885474	0.968667244852588	0.932409505451731	0.989995232145349	0.824980649689413	0.935849078632561	0.89049388707037	0.98838466095919	0.889826172956827	0.95341755609788	0.942461017821079	0.872383439165377	0.964033436370427	0.928779934354891	0.954112702146249	0.902915471438651	0.909740480934755	0.917445564071434	0.947001875508837	0.941363850814515
534	0.909825365248435	0.945582921685455	0.94838459870617	0.975732312695718	0.911095661001705	0.958117946861703	0.959124027487222	0.944234508905478	0.89618734086293	0.880993756878549	0.881332108315078	0.955164820044222	0.979677238177898	0.969566045089253	0.933159873806543	0.989366875575983	0.825735175389817	0.935946111354919	0.890564979573963	0.988526945082963	0.89105488950201	0.953145319629271	0.942370702607526	0.873333177017376	0.963999727178049	0.929453516148849	0.953712853704137	0.903540614028043	0.912214092745907	0.917433311972562	0.947019650956201	0.941894652401221
535	0.910692387606128	0.946837186848165	0.948130437669148	0.976105427636309	0.912440893481521	0.957551397879237	0.959447776404733	0.945371132848459	0.896940551849182	0.879769213393174	0.882412643348704	0.955612640174989	0.979655561904047	0.970712550485421	0.933960366714295	0.989317807141272	0.826234653204128	0.936447863143123	0.890548097340927	0.988726238831668	0.892282712247301	0.953094970009024	0.942223451416223	0.874560103420283	0.964299054953477	0.929786096246899	0.953386904114053	0.904422663788233	0.915235498890709	0.917412890809441	0.947251916822568	0.942514053938785
536	0.91126922608202	0.9484643564007	0.948157936954672	0.976579262022178	0.914388173366544	0.95709779930148	0.959634752360413	0.946600838115635	0.897932272094795	0.877957375439101	0.883613187381687	0.956412568204269	0.980697435970043	0.971731895245342	0.934738500471019	0.989652129739294	0.826821900984157	0.937349751779929	0.890839002664123	0.989018991850621	0.893759725901379	0.95323353899426	0.942038491145613	0.876035131909525	0.964831627220564	0.929671865307024	0.952973234319892	0.905321170493189	0.918774581112792	0.917423628107594	0.94768928552911	0.943207621947524
537	0.911650034082989	0.950753612752142	0.948250752917158	0.977136707597782	0.916866649032737	0.956744619024975	0.959835289707692	0.947894873329236	0.899024760329431	0.875399861181155	0.884747787049548	0.957449535604515	0.982194476741011	0.972645812580324	0.935379660518681	0.989833690246144	0.827140237034325	0.938644265368056	0.891154775216209	0.989060232777726	0.895050589716605	0.953554729065134	0.94187475144992	0.877827305565389	0.965438950221837	0.929363090261908	0.952507157391952	0.906977750086948	0.922776046046771	0.917551798816394	0.948312112593778	0.943887588367797
538	0.911870750884209	0.953500177476975	0.948423840444428	0.977774502490344	0.919822005348678	0.95648783600228	0.960056544682271	0.949238495723218	0.900292569444127	0.872099816676222	0.885666678104883	0.958575579254737	0.983517737164822	0.973413582994092	0.936162349646532	0.989454423781422	0.827638769219976	0.940293995900002	0.891594293675299	0.988923636823188	0.896276509700011	0.954032162193455	0.941730168281069	0.879836887742448	0.966096304900206	0.928896371751321	0.952045633245717	0.908704845245207	0.927158092612233	0.91790033372996	0.94911376029615	0.944574884309964
539	0.912161993834567	0.955865507971694	0.948745158076344	0.978497067256852	0.923201214581805	0.956333273225295	0.960304797397189	0.950640812466582	0.901599778210898	0.868240431055635	0.88649338465345	0.959569252834379	0.98473366503833	0.974078330848267	0.936925545892684	0.988894365832915	0.827972193400368	0.942274723536774	0.892062718317941	0.988515482927719	0.897589741126116	0.954673706393852	0.941566202943364	0.882097558634457	0.966753132363626	0.927868711545631	0.951929225987721	0.910252233327885	0.931849792541633	0.918538443680401	0.950086947360035	0.945619539264837
540	0.912480898390494	0.958428767136179	0.949094700438861	0.979300572352032	0.926937631725475	0.956290312843099	0.960462306016074	0.95212071138916	0.902955397316061	0.864458619491732	0.887652469810965	0.960439073266725	0.985927928405224	0.974701662113345	0.938441939493039	0.988287705547636	0.828450693524718	0.944539121601989	0.892553517904137	0.9880629530246	0.899151512481048	0.955493563847037	0.9413937259981	0.884590456102873	0.967473864528591	0.926214561300511	0.951862370894837	0.912122094448747	0.936775981084145	0.919527644012047	0.951207832611596	0.946786085817885
541	0.912491050755144	0.960865404360534	0.949562994608363	0.980178121964533	0.930958081892465	0.956365496178241	0.960828266016051	0.95370246894666	0.904510251430201	0.861533951421538	0.888906212757028	0.961534714824547	0.986957758789388	0.975054058915484	0.939574342310505	0.987661009176914	0.829379666666289	0.947051316525448	0.893258617152274	0.987638741823486	0.900740897129928	0.956498310719974	0.941341347828625	0.887188757557081	0.968223613510943	0.923964489179729	0.951862223887908	0.913338141843105	0.941824545453036	0.920906336838881	0.952459616968024	0.947721845302788
542	0.912568985075695	0.96322778648281	0.950242231541598	0.981112530153854	0.935198446999678	0.956576003846803	0.961674815765972	0.955397256677962	0.906295311599634	0.85984361912322	0.88959896317289	0.962329107127704	0.987942782860456	0.975410985488353	0.940287331728569	0.986961859655386	0.830422218681292	0.949757070852053	0.89371838698772	0.987088715224802	0.902389453305142	0.95768156669947	0.941546018585252	0.889891677085678	0.96898235097792	0.921564366110485	0.95205092430306	0.914134223972295	0.946865368510331	0.922707925649581	0.953832173974702	0.948522328639137
543	0.912278050299668	0.964528304680593	0.951075111187081	0.982092233092017	0.939593732918757	0.956942440375762	0.962800156521301	0.957212936096143	0.908027876691924	0.859588617155467	0.890276241434207	0.963227603459082	0.989346395691801	0.97545258783867	0.940876180602958	0.986624341117354	0.831336012325741	0.952602298073105	0.894421341345946	0.986927567050689	0.90380059677361	0.959088305538748	0.94195496399567	0.892725947002655	0.96976589043695	0.919219568429481	0.952247085352178	0.915290939455148	0.951776384287126	0.924949460987514	0.955304218959482	0.949257026804817
544	0.912125643380394	0.965525573060056	0.952070881775617	0.983107183913233	0.94407835359887	0.957485436884899	0.963972405624241	0.959157561227669	0.909993210051088	0.861139366559013	0.89129317207388	0.963707185041948	0.990640708968323	0.975351547584287	0.940907423712172	0.986729375186396	0.832452028828537	0.955521994732453	0.8948180428168	0.986422431011911	0.905105287339026	0.960722334103044	0.94248156025845	0.895665721874877	0.970667657400369	0.917450098581452	0.9525388757797	0.916351333723694	0.956433029657097	0.927591219565999	0.956859549034611	0.949700362372226
545	0.912011539248518	0.965914998559312	0.953286730117628	0.984146926799535	0.948593469669505	0.958215940992211	0.965104246483034	0.961237036319478	0.911897910569417	0.864511128920009	0.89259323617882	0.964121037890709	0.991976198621124	0.975283353433652	0.940819494431002	0.986677774583832	0.833621190060776	0.958482098862712	0.895390406367811	0.985738488623018	0.906451085443851	0.962606862760667	0.943125486155139	0.898714177937271	0.97162827227218	0.915876308703635	0.952814282980816	0.917718305617558	0.960738498676589	0.930538499255761	0.958485169414445	0.950095010995729
546	0.9115935818017	0.96581716166821	0.954806335342256	0.985186944468941	0.953078433014189	0.959145391186486	0.966292592454615	0.963420752586958	0.913675239638703	0.868904469013396	0.894286145192534	0.964499112438642	0.99289604516005	0.974923582620193	0.940564040286664	0.986547394252101	0.834613347902216	0.961430312668252	0.8963407474716	0.98517230198871	0.907751435787688	0.964737304895927	0.943883216331328	0.901874444203006	0.972668489255697	0.914574598906378	0.952750982151711	0.918550346992098	0.964596502860144	0.933693071395352	0.960168397504368	0.950420507809577
547	0.91140593454721	0.965399688331003	0.956487698443671	0.986204240966293	0.957484909325204	0.96026817265634	0.967773379395228	0.965663541657828	0.915539398675651	0.873446944928799	0.8961409742347	0.964492263577581	0.992480926882	0.974698367658642	0.940171602939976	0.986387719020021	0.835833643957028	0.964314324223464	0.897481667336086	0.984449265335592	0.908806419952207	0.96711192388444	0.944758593582171	0.905085229944248	0.973759326070243	0.913750690729258	0.952875788127164	0.919293336346067	0.967905324402228	0.936971805081181	0.961883721158826	0.950821205586109
548	0.911277097297754	0.96425664137631	0.958388899127821	0.987189771070057	0.961759598650694	0.961576853647256	0.969398569242885	0.967920942522299	0.917434725120255	0.877931613776222	0.898490267863494	0.964342967740555	0.991725240718147	0.974476980621074	0.939668364875221	0.986481715380145	0.837356313267996	0.967081956756804	0.898246310211489	0.98378256618129	0.909645681877886	0.969703421741777	0.945780408004505	0.908193000324587	0.97506072088349	0.91319942056723	0.952861699305243	0.919247739497693	0.970584242549595	0.940287736570133	0.963618496868021	0.951300735058995
549	0.911142680618048	0.963037534434302	0.960550686131312	0.988131208585397	0.965845046913873	0.963069347515017	0.971255821497447	0.970151478408468	0.919369908886857	0.882567652689884	0.901214331135573	0.964282686758557	0.991260924133685	0.97423731123888	0.939160063724311	0.987087853444216	0.838439178457227	0.96970271155358	0.898422687220613	0.983173156055889	0.910495800408406	0.972495153001268	0.946977981733658	0.911247208016031	0.976561101168152	0.913027100362096	0.953057451669335	0.919660865181393	0.972589623349024	0.943545442727414	0.965352563647789	0.951641474449316
550	0.910893320607669	0.961866883352442	0.962858081969263	0.98901350364754	0.96966503882749	0.96471907397558	0.973211473432528	0.97228434856551	0.921371440917521	0.887024835930349	0.905014822487973	0.964129035764368	0.991165859610147	0.973953135396844	0.938687409864364	0.98758276645786	0.839846512986372	0.972129826920047	0.898331647266594	0.982746450533993	0.911436762739128	0.97541229297205	0.948409269278376	0.914213184572118	0.978263376600938	0.913320245885187	0.953015569873436	0.919748774621279	0.973887031536694	0.946664795819242	0.967057206522904	0.951871689713711
551	0.910739771184452	0.960821144485002	0.965367632731957	0.989824555218588	0.973161716181317	0.966493079986435	0.975189640486	0.974263460024311	0.923426016674244	0.890424216584889	0.908353399092617	0.963916721840992	0.991539970175648	0.973735999028962	0.937762369256426	0.988286542986045	0.84113380018048	0.974339908410981	0.898019099079691	0.98250054094096	0.912101544092708	0.978383703574553	0.95000425101893	0.917046290840851	0.980051594516625	0.914168376643454	0.952892821190309	0.919633339877781	0.974461162547784	0.949559149479358	0.968710241183292	0.952199515474904
552	0.910909561474277	0.960310895799783	0.967985396646396	0.990545499487978	0.976284855654385	0.968346896921054	0.977129188559912	0.9760432763364	0.925424608834705	0.892433879595615	0.910684266409475	0.963449721724824	0.992052080075475	0.97360169202469	0.936971759914774	0.988722468243	0.841946147156438	0.976298298870315	0.897769725355909	0.982411990161121	0.912499466939458	0.981356368292673	0.951653997966025	0.919820857591596	0.981938951956456	0.915415047493489	0.952766097332157	0.91982818036466	0.974330542186908	0.952176919631978	0.970292481866067	0.952657282612105
553	0.911298264817625	0.959732057857891	0.970601598439208	0.991160621312031	0.978986432494917	0.970225493563178	0.97877187844355	0.977580553437478	0.927175258462968	0.893527130532936	0.912584312119755	0.963133971622747	0.992550791696894	0.973569173525433	0.936812786744763	0.989130935496857	0.842363974683433	0.977980098805251	0.897846247425943	0.982374467747781	0.912723896912157	0.984274604868121	0.953258409431675	0.922364524585332	0.983867551790651	0.916484059982965	0.952614299151771	0.919921630429358	0.973530403937384	0.954477718277997	0.971777636782536	0.953419889776386
554	0.911913661564471	0.960020167245003	0.973126054996865	0.991650711049558	0.981193510536072	0.972062448540729	0.980277256186584	0.978843920635987	0.928982946964526	0.893937520115719	0.91360564433064	0.962477372767625	0.99265149826951	0.97379143998617	0.936564260238377	0.989586021412899	0.842727858713935	0.979362655280002	0.898006059931072	0.982094168257758	0.913100054794488	0.987029026527367	0.954825182732361	0.92458064007848	0.98569098781576	0.91729467278106	0.952636233741226	0.919888151514158	0.97210542358497	0.956422186745015	0.973134400254278	0.954321246058053
555	0.912642495345793	0.960457180057456	0.975567882496004	0.991999898184782	0.982855887727063	0.973797884769328	0.981865813755361	0.979815833246783	0.930638725522486	0.893588591161592	0.913626344176029	0.96198558936087	0.99258601171949	0.974089528018548	0.936612107105753	0.989850690380643	0.842927597037237	0.980424686118474	0.89851747162862	0.982339952012031	0.913740940172785	0.989557973671793	0.956443317250091	0.926384645381863	0.987396767356188	0.917826575926666	0.952643332476077	0.919231325200919	0.970140344644737	0.957994190720509	0.974326981216632	0.955128859140967
556	0.913458989791224	0.961193917067086	0.977846067324816	0.992193009492438	0.983928220659872	0.975372659986956	0.983342497041636	0.980461679599582	0.932218814777878	0.892649383345586	0.912839864939157	0.961502769824432	0.992215173042772	0.974532171900272	0.936760424589026	0.990017694955673	0.843145772735926	0.981130794345384	0.89877804477314	0.98288437462659	0.914100071310244	0.991776783725023	0.958000296172763	0.927651771929786	0.988959648532386	0.918582957298405	0.952471220791871	0.917799255965216	0.967706010835902	0.959197904393094	0.975307308236129	0.955717429699722
557	0.914551952112883	0.961957430080068	0.979767393080333	0.992229564493752	0.9843962318392	0.976727147411091	0.984422753059594	0.980773345279435	0.933757816545789	0.891837921200306	0.911249065762776	0.961230915963911	0.992121564075293	0.975398631988456	0.937193176759226	0.989878370409381	0.843570486568813	0.981492526711605	0.899238849790297	0.983449933086194	0.914423666021925	0.993649792299194	0.959447687472975	0.928424125537301	0.990245808863583	0.919295258375427	0.95238134620377	0.916334029722326	0.964896151847161	0.960050070440921	0.976045870007576	0.956437225770711
558	0.915629154051485	0.963178585232583	0.981488781991966	0.992113372217647	0.984268942033455	0.977826732328218	0.985179349623272	0.980770516874604	0.935111048724243	0.891789304662491	0.908948674354605	0.961190874721944	0.992329005371408	0.976480156724299	0.937822147426969	0.989589688293107	0.843805711330738	0.981516047332023	0.899483034780996	0.984067934136903	0.9147290095622	0.995133288714669	0.960734890376477	0.928803608722408	0.99140664058653	0.919892731706634	0.952311367498144	0.915384822264449	0.961835940825152	0.960560062135921	0.976532145475143	0.957107515297875
559	0.916758809712551	0.964536338346685	0.982892934521526	0.991856595914004	0.983594108328372	0.978653064396183	0.985662972279524	0.98047169191711	0.936435044733939	0.892201783502551	0.906381331706934	0.961274494908164	0.991427117256321	0.97768691915322	0.938768589418803	0.989394158993175	0.843793699739096	0.981218987085992	0.899967424779973	0.984712083629639	0.915191082920279	0.996203301582978	0.961758696459096	0.928921355921033	0.992285937372116	0.920572151738189	0.952741410450549	0.914483756438983	0.958640657660909	0.960736721398933	0.976761793638351	0.957298961341461
560	0.917891031986577	0.965640260894518	0.983891807060529	0.991482582706075	0.982414285656749	0.979177183799594	0.985845922938315	0.979894731320253	0.937630864424517	0.892132151500936	0.903262070064283	0.961173195808753	0.990435110012232	0.979050973716695	0.940060096554276	0.988897123291491	0.844103910491267	0.980612354976369	0.900812745748982	0.985176562069135	0.915598397922464	0.996828764872322	0.962505720555167	0.928681514245079	0.992936115075319	0.920890208850977	0.952918637021608	0.912532254289837	0.955405976875759	0.960598596432723	0.976725846937898	0.957307828465629
561	0.918957111262644	0.966950248015717	0.984629051476053	0.991011726729886	0.980804951289092	0.979401582073838	0.985594151404928	0.979094592089416	0.938459844922849	0.890940469609663	0.898501474223471	0.961071236437166	0.988963519302139	0.980564431728927	0.941292840246057	0.988536687520415	0.844347029218298	0.979729023990624	0.90152218725966	0.985609164875636	0.915851048955872	0.997046546120764	0.96293565179056	0.928095163202081	0.993281157747771	0.920964543346066	0.953306999051047	0.911067420673523	0.952223087503492	0.960170668823565	0.976437363148385	0.957069675351249
562	0.91995452960577	0.967965309811076	0.985063359977147	0.990455414047892	0.97885240752207	0.979335992352345	0.984959820294984	0.978116041087367	0.939046435977144	0.888924852311157	0.893793792106766	0.961128538373723	0.98674891966489	0.982010810141531	0.942559949635119	0.988157825157723	0.844631422248359	0.978602192864455	0.902599306525195	0.986038389354416	0.916549071362253	0.996897371511378	0.963101428892133	0.927131559097073	0.993373656629324	0.921022338314305	0.95386208022777	0.909699596783602	0.949154801404821	0.959508116209112	0.975925065104694	0.956655923271822
563	0.920706498681064	0.968247866600483	0.985215752521077	0.989842730561382	0.976638391824291	0.979009332116757	0.984061352736485	0.977004737630711	0.939573356704745	0.886649573550407	0.890052401599565	0.961326005676018	0.98364091276493	0.983349785794434	0.944049014173139	0.987994000965543	0.845381933366698	0.977282643260617	0.903273851508804	0.986337501939445	0.917681726118274	0.996400130957033	0.963042903851175	0.925761897948786	0.993191068786404	0.921461087917932	0.954356664830999	0.908752984347652	0.946269433699462	0.958656904268861	0.975219696532137	0.956332955312187
564	0.920775315157099	0.968561538353082	0.985111479015951	0.989196196707733	0.974253133865514	0.978460499681719	0.983062593264474	0.975828192382464	0.939997424524585	0.884222943269678	0.88693662489073	0.961390693958889	0.980450547228792	0.984537534212569	0.945161574263718	0.987924149893777	0.84648513981061	0.975829242873662	0.903442765156005	0.986472879880185	0.918927019219805	0.995591311078532	0.962792260229572	0.924261286202533	0.992822478012593	0.922770862550241	0.954789690716078	0.90845094439647	0.943642691526362	0.957659247153593	0.974350559985834	0.955619340903533
565	0.920566008181151	0.968073071919457	0.984784617890184	0.988553368521851	0.971822326236502	0.977742032626818	0.982033627441403	0.974655685261483	0.94006438294914	0.881323427827052	0.885384716583518	0.961772359945814	0.977003526315208	0.985608019583506	0.946230099568872	0.987661956627159	0.847754629812228	0.974299040264	0.903475238670807	0.986734066786618	0.920389249884693	0.994564044890278	0.9623572804617	0.922695141998996	0.992406720148084	0.924773743508469	0.955122825217738	0.907944003730644	0.941339946107087	0.956578140733241	0.973369704453178	0.954874809400978
566	0.919844641170326	0.967756232376994	0.98422021132645	0.987943331218723	0.96946214341464	0.976901660665074	0.980737288726054	0.973535923686296	0.939836957137873	0.877910325402469	0.88459355566358	0.962008420549568	0.973087472286856	0.986513873097917	0.947001991313894	0.987105888610007	0.84882891447295	0.972765743267436	0.903373539007934	0.986879700889392	0.921698305435979	0.993403393733982	0.961682110479243	0.921135832255105	0.99190302944925	0.926828078268023	0.955391623292739	0.908446974759864	0.939395558608914	0.955489309424737	0.972324476768423	0.954313061074259
567	0.918979417492213	0.967041638596005	0.983574373141457	0.987398869458483	0.967284960125312	0.975996970616704	0.979543942548323	0.972531319306469	0.939475325815751	0.874268130679125	0.883825581216382	0.962070762869189	0.969537282122593	0.987091324672182	0.947631578693658	0.986520936132638	0.849826799917119	0.971304562738232	0.903501489609923	0.986944998711781	0.923203639968913	0.992191207519583	0.960948784620057	0.919750689701951	0.991334346620506	0.928470420792576	0.955847932918261	0.909947475109306	0.937849918794192	0.954469832407827	0.971284551630559	0.953916245891535
568	0.918080049971342	0.967092241129246	0.982902674794044	0.986933874310601	0.965393019137403	0.975092900054197	0.978706987164181	0.971700440030508	0.939139236730276	0.870492198724476	0.883832433149815	0.96204163572384	0.965729158471347	0.987225230043041	0.947705334146418	0.986158876270894	0.851003033037234	0.969967081805742	0.903123983886571	0.986757873750089	0.924737093657207	0.990994124576108	0.960239777130672	0.918656949395853	0.990798545417887	0.929881871546023	0.956442310755656	0.912080843840442	0.936727981822653	0.953587707170896	0.970303139443092	0.953294216066676
569	0.917240735980324	0.966901321391166	0.982103815760064	0.986591170850123	0.963860405077448	0.974247199677517	0.977947823794194	0.971091329939789	0.938863650657225	0.866291017590759	0.884645124821773	0.962079380836144	0.962804150099171	0.986887509845033	0.947485931636729	0.986112311578609	0.852154474098005	0.968815650606059	0.902931445290338	0.986779327460722	0.926343603996176	0.989858376844203	0.959506105456972	0.917823889362112	0.990243862358137	0.931042315385636	0.956847429540445	0.913582683866943	0.936048557477511	0.95292174359051	0.96943699200207	0.952543134496046
570	0.91649951744205	0.96690688641466	0.981395603814406	0.986381800730375	0.962727865693397	0.973483309723662	0.97733131190858	0.970742732967258	0.938589454375834	0.862011408769236	0.885683231830628	0.96185740114901	0.961420291644898	0.986591097446404	0.947531360177259	0.985851784080482	0.85346843281128	0.967913546022388	0.90268301337126	0.986892884884766	0.928110202748853	0.98884065537158	0.958857433066736	0.917224577755686	0.989756238908372	0.931851004227006	0.95664520034928	0.915321469635126	0.935830815932514	0.952530926683218	0.968721543882082	0.952341962558898
571	0.91602669765918	0.967328410244647	0.980853500135376	0.986302208644126	0.962074105273982	0.972835823634074	0.976621008144363	0.970686704372989	0.938508961884573	0.858763554200585	0.887045916819228	0.961839048317158	0.959839568594126	0.985998228287413	0.947226581377273	0.985737606242693	0.854682596835545	0.967321029657031	0.902343665571637	0.98726689714713	0.929809480228406	0.988019753907863	0.958336265225318	0.91703630047254	0.989223958064479	0.933107116808789	0.956356186614572	0.918052807919642	0.936088913682533	0.952473762694068	0.968210254524178	0.952548769560918
572	0.915815440718412	0.967611002423961	0.980396069651029	0.986347290886134	0.96194292861907	0.972324579184015	0.976301462490441	0.970920507294823	0.938799711255257	0.85773660895226	0.889257628382678	0.962042287295824	0.95862557088857	0.98522335227361	0.946911196466601	0.985505430420072	0.855520601270527	0.967081876700145	0.902639496338753	0.98771615864283	0.931543445859837	0.987413985391301	0.957899776231918	0.91727701859474	0.98879841960208	0.934599776298996	0.955961497309399	0.920482309011652	0.936820567709286	0.952800858430312	0.9679366189688	0.952813272875644
573	0.91578842540096	0.968046861210881	0.980020463465674	0.986528262911677	0.962333174259682	0.97196653340112	0.976555214486076	0.971439957461353	0.939443444847366	0.858856345921317	0.891672587135102	0.962396515287772	0.958101882794932	0.984382719965478	0.946867351195305	0.985290661330808	0.855951259918014	0.967232239657448	0.902955706521516	0.988128085288835	0.932820533900737	0.98704021441948	0.957582324443899	0.918128119672352	0.988579258242555	0.936322296301474	0.955791125887806	0.922504048308601	0.938043245117336	0.953534493572239	0.967908037192892	0.952949906049997
574	0.915918022495892	0.968877473172244	0.979773082762187	0.986844754138021	0.963258057352894	0.971767262461416	0.977217548478022	0.972242017606753	0.93998493311546	0.861207489806029	0.893965059689752	0.962666937590168	0.95825627534003	0.983758918515843	0.946205413859436	0.985163358051655	0.855897703385444	0.967780154909448	0.903600930816255	0.98858150300755	0.93353813848982	0.986938549618543	0.957444507107698	0.919669051162345	0.988586944648685	0.9377399834048	0.955532033227431	0.9238790687461	0.939745161040521	0.954684439143182	0.968131541318935	0.953051209032033
575	0.916748078958534	0.969698278511838	0.979757977111761	0.987309804229376	0.964702303697026	0.971730922264738	0.977993170957037	0.973298171790783	0.940634043519802	0.864305065008011	0.895639821923144	0.963016691523805	0.958763379047929	0.983153910946162	0.945613964527741	0.984837355653224	0.855626007491077	0.968714016020182	0.904776607580087	0.989173282431715	0.934088955026498	0.987122370461213	0.957501171765936	0.921660796858875	0.988737613610174	0.938428285704549	0.955114508218868	0.924628052552531	0.941897272643789	0.956248875264621	0.968608835498036	0.953251831660676
576	0.91790914433857	0.970872807541021	0.979995829654434	0.987900173100553	0.96662819202422	0.971842409232524	0.978842538284527	0.974566547380391	0.941689988195252	0.868272358514721	0.896026983505995	0.963374728832741	0.960248856462037	0.982436368506266	0.945307285664034	0.984736785144628	0.855178717234888	0.970016677341341	0.906104874629508	0.989561204032533	0.933982373644304	0.987576066397656	0.95769610118315	0.924074169703615	0.98898242564667	0.939140504794404	0.9547396687358	0.926188309606762	0.944459108050119	0.958196576495962	0.969316805065196	0.953168772121358
577	0.919472909988975	0.971926303089551	0.980434724110647	0.988600240252924	0.968982402478414	0.972087814707435	0.979884610642088	0.975996874926378	0.943135827210103	0.872850852232324	0.896100736043466	0.963973964163408	0.963547176506644	0.981884796022767	0.94556618516818	0.984957590988125	0.854933076496644	0.971643057514842	0.90759971379341	0.989590940809646	0.933693603795115	0.988276630921215	0.958002339133922	0.926898746335223	0.989403721553991	0.940301254451421	0.954531732276971	0.927411174053848	0.947383139310789	0.960465397634138	0.970232985018183	0.953110107680732
578	0.921136520120991	0.973317185245752	0.980905726450724	0.9893870576824	0.971689796290703	0.972446625489488	0.980900981893425	0.97752941116403	0.944743737537613	0.877198938279148	0.896975993185968	0.965012944899301	0.966917122870366	0.981659540997869	0.946104015011076	0.98499171052868	0.854660151788698	0.973535841216102	0.908999214158742	0.989619588817501	0.933235723654154	0.989194252319294	0.958359094397367	0.929962078779312	0.990047488684798	0.941757866451607	0.954113277180747	0.928313983628032	0.950585234954125	0.962986997037279	0.971317146532728	0.953128358130156
579	0.922807958854569	0.973994824728956	0.981498739677926	0.990251916387669	0.974639033234055	0.97288014069925	0.981697675876513	0.979103930057416	0.946489943070013	0.880914109679756	0.898136992271918	0.966040496176059	0.970018478893848	0.981528711992327	0.947442244586875	0.985049280471118	0.854126548205493	0.975619993731436	0.91067525565164	0.989772869988088	0.932607019389017	0.990259572705008	0.958687399307853	0.933180931026426	0.990890539807981	0.943662177824623	0.953362219611972	0.928304137965451	0.95397626277027	0.965684477902913	0.972523805031061	0.953372213057033
580	0.924151685314125	0.975112353516223	0.982232493062976	0.991151922935395	0.977724004505275	0.973345688352792	0.982640028885229	0.980644351070671	0.948328009503566	0.884378103503653	0.899545571361238	0.96673523415585	0.971933080753058	0.981648596639295	0.949243676928463	0.985191024251806	0.853680611483571	0.977813107791579	0.912229047741825	0.989605095554089	0.931995040047492	0.991450907414987	0.959078463255231	0.93647288160472	0.991833412830703	0.945833582850356	0.952499984963829	0.928211253528792	0.957439224532176	0.968442594292956	0.973788908268659	0.953681498797246
581	0.925283730620179	0.97616048065185	0.982935992018193	0.992054070977153	0.980844831447818	0.973818305648654	0.983498000175989	0.982081964431928	0.950068173026564	0.88736246898618	0.900816680952174	0.967776108993495	0.973608709128589	0.981673234373603	0.950454401821119	0.985208819722096	0.853257235684808	0.980010398841812	0.913794062275099	0.98925824773287	0.931269765440827	0.992711349595908	0.959443024250748	0.93975170958186	0.992792341475434	0.948016523206817	0.95193925239091	0.927828926562854	0.960855669054948	0.971167985139658	0.975061186093233	0.953913570098947
582	0.926119346423019	0.976820154016413	0.983610285066685	0.992920628352732	0.983841430775197	0.974266958437453	0.984626599175277	0.983345744568482	0.951518485208269	0.889104066521792	0.901927032304324	0.968800945137541	0.975749372316391	0.98196941309401	0.951833252818425	0.985233857914606	0.852880342551997	0.982113262544779	0.915453464582998	0.988874334831362	0.93088675739984	0.993948367706676	0.959702895245636	0.942838628159088	0.993873701780644	0.949816384656219	0.951588480083496	0.92683702244058	0.964120376409563	0.973753196330545	0.976268260474134	0.953790024636946
583	0.926801937977632	0.977424704219707	0.984213890467983	0.993716564977289	0.986583729280064	0.974664466925024	0.985429063365275	0.984382180832261	0.952841457720812	0.889415469267261	0.90304440835698	0.969602276766046	0.977445761849919	0.982249650816698	0.953079872882305	0.985788388269757	0.852931632765755	0.984026205457552	0.916905480887192	0.988366686914559	0.930444013666844	0.995122305430703	0.959970525695905	0.945709991990479	0.994965794836423	0.951505568887623	0.951276309852672	0.925966100192242	0.96713259657544	0.976086212168777	0.977352770540997	0.953602079263882
584	0.927283030120587	0.977508937859857	0.984813765185642	0.99440763153569	0.988968883099514	0.974982251577199	0.985800443123098	0.985151408296991	0.953703139385946	0.888902836863565	0.904515103954548	0.969907127700121	0.978358898505642	0.982811005383124	0.954307253218793	0.986307932300862	0.853464858109488	0.985649915020858	0.918214482040471	0.987667358164975	0.930164226627972	0.996178342442737	0.960109839912505	0.948091807401729	0.995923612377229	0.952611264425837	0.950509823474887	0.926135048046687	0.969773890138688	0.978071639582021	0.978266807574979	0.953779823382027
585	0.927810137582124	0.977595560082771	0.985376346621408	0.994971447558892	0.990877232828858	0.975189295990041	0.985886046476875	0.985606917740105	0.954583797009399	0.888274642250399	0.905997549453842	0.970088741328831	0.979177221672216	0.983283354064024	0.955964664668277	0.986843251868299	0.853929984518391	0.986913779847845	0.919213026641478	0.986911751111643	0.930320483005517	0.997044148846191	0.960093177072227	0.949838424580982	0.996694191480996	0.953883991311511	0.949862532557098	0.926866881818232	0.971947077132626	0.979631565051756	0.978960636602102	0.953745729465356
586	0.928064738596993	0.97740042202511	0.985771087483714	0.995374662693891	0.992213116511142	0.975258498891926	0.985983572502685	0.985719269126877	0.955406651456732	0.887647708896248	0.908081328812599	0.970291475098997	0.979745578027088	0.983741845988229	0.957399521836939	0.987692635922674	0.854841697186165	0.98775364562637	0.919861925087054	0.986211863544066	0.930609038290677	0.997683965244446	0.959883745933584	0.951063068042251	0.997332588897007	0.955071537617179	0.949564903820649	0.927770279790145	0.973565569194168	0.980707421198901	0.979410818506796	0.954212832092348
587	0.928285980364123	0.976584600842676	0.985991358173428	0.995600198750074	0.99289816295273	0.975176970802383	0.985975656476767	0.98547126752346	0.956084583538883	0.886722916278048	0.911086460758572	0.970607949673499	0.979595399602434	0.984241962066192	0.958619243552411	0.988524492243562	0.855946707582915	0.988125509505813	0.920315774779125	0.985779840923871	0.931326139058392	0.99805011431025	0.959549718488655	0.951727777813741	0.997749266271864	0.955613982071613	0.949109131540298	0.928201559061778	0.974570346437864	0.981267319668901	0.979601524227265	0.955179059383736
588	0.928763471665155	0.975367996045711	0.986049783532546	0.995632651700324	0.992883850519849	0.974930695791272	0.98589653018821	0.984878907114643	0.95655889155287	0.885132868186306	0.914283801513618	0.970946412965721	0.977436803230666	0.984682159038553	0.959530433455284	0.989311509372467	0.857037902090403	0.988012064903849	0.920234992183618	0.985602972675573	0.932226166143766	0.998077625285953	0.959183454302295	0.95179683001035	0.997916512956037	0.955772012427662	0.948612969972171	0.928550520479072	0.974913925130566	0.981307068667882	0.979516194714888	0.956372746587505
589	0.929591112521417	0.974167011409798	0.98599211940377	0.995459595291794	0.992159782191817	0.974506796117617	0.985681486425669	0.983976776260598	0.956891158168141	0.882839870850507	0.91681149302996	0.97099976035028	0.975285991824162	0.984842189255655	0.960027696726773	0.990552459266945	0.858240240134992	0.987410203798691	0.920035633666683	0.985444097838803	0.933307127772302	0.997753943171265	0.958703773941132	0.951348117707768	0.997726048625988	0.956054539399996	0.94850096293788	0.928496636788394	0.974608974835018	0.98082716612037	0.979154681619795	0.9576566714843
590	0.930241952916457	0.972671073765274	0.985740865196677	0.995070523301166	0.990746660684815	0.973914037091359	0.985626874295939	0.982791144030707	0.956803009073095	0.880007946681537	0.918720277185672	0.970950589621214	0.973707715335454	0.985150487366993	0.960159886171021	0.992023612105691	0.859808840837476	0.986353528000401	0.919600616514919	0.985379327074391	0.934568756928224	0.99710513321197	0.958136117555656	0.950347087318512	0.997142874191555	0.956073621886679	0.948832057252579	0.929490607772143	0.973685453028263	0.97985766835107	0.978532485633203	0.959047871009304
591	0.931072638261885	0.970632935068503	0.985304347318547	0.994459364177466	0.988675670035874	0.973159755678583	0.985433084528749	0.981364532439758	0.956336801232608	0.876903397538257	0.919736710122718	0.971373962881463	0.972396938415277	0.985307550806513	0.959882948719239	0.992771117121467	0.86137499182777	0.984879807756376	0.918960238038699	0.985328461417231	0.935551568186056	0.99613680961135	0.957470052605958	0.948869462944075	0.996325142020108	0.956116737210898	0.94939905623388	0.931026562699022	0.972207081000313	0.978469586710278	0.977676634598019	0.960728451300772
592	0.932179880575806	0.969112484015325	0.984786301371513	0.993652091584631	0.986015241112731	0.972278146669423	0.985542031724398	0.979747800692279	0.95588463185998	0.874037327159817	0.920626287639274	0.971800565548553	0.970724649121158	0.985421022623518	0.959923315580027	0.99364914862945	0.862903066191582	0.983052576225208	0.917986242113476	0.985446471779831	0.936527535153989	0.994874075615577	0.956719075117822	0.946994332803895	0.995343629228089	0.956458054649667	0.950034128061568	0.932734269766577	0.970257496083325	0.976728803944344	0.976619536957235	0.962241453692158
593	0.933624558923394	0.968384596998966	0.984113789680962	0.992690399919974	0.982887871219101	0.97128685572854	0.985280981214872	0.978006257255825	0.955423640498206	0.872270468468855	0.921873336332685	0.972224322985233	0.969518714616334	0.985514753854229	0.960174211892016	0.994370778823227	0.864533908753502	0.980948697933342	0.916598316685566	0.98557939810682	0.937053706927264	0.993366075694723	0.955979882124212	0.944834923672828	0.994224173266965	0.957004667690184	0.95048089666272	0.934400552260568	0.967922274754313	0.974703854166556	0.975401407626308	0.963945821009722
594	0.93477235896277	0.968034307703204	0.983345327193273	0.991635950359145	0.979409330243603	0.970204925183032	0.98509740956392	0.976213284048429	0.954820881269329	0.872107399491276	0.923180927482695	0.972743898374526	0.969142019010558	0.985658989989484	0.961150437488159	0.994462743533505	0.865975199254518	0.978650263698428	0.915060784091859	0.985927781358672	0.937810514055356	0.991637778150588	0.955143600729134	0.94241386220785	0.993005149395076	0.957889834081549	0.950640016514274	0.936217559266302	0.965310700412416	0.972498032799074	0.974050972539944	0.965958501673886
595	0.936248220171057	0.968851479521763	0.982378308183869	0.99053184250279	0.975716205532931	0.969048964915156	0.984854180129687	0.974422937784687	0.954380476134587	0.873109885854458	0.92409501471401	0.973767372053959	0.969765593295743	0.985528838599521	0.962117538277921	0.994303228482554	0.867226934786479	0.976251430292276	0.913365332903262	0.986567303593894	0.938651577670385	0.989743944674449	0.954379447110095	0.939959394724321	0.991729650374655	0.959063543708355	0.95060884917559	0.936928039525243	0.962567051738785	0.970221369939676	0.972619224246906	0.967789434276992
596	0.93782040133237	0.969496409136649	0.981238289641547	0.989417399178045	0.971931502740095	0.967838941196064	0.984447621687987	0.972695079455113	0.953910443958377	0.874463476511347	0.924704370419959	0.97512585375721	0.970280753894406	0.985368386812013	0.963349786209182	0.993938815264263	0.868886086066447	0.97383503376965	0.911928686722056	0.987173539409221	0.939270344846789	0.987758236642781	0.953651607913527	0.937620647148336	0.990389210848656	0.959709645302136	0.950556333863722	0.937073339549647	0.959833908226929	0.967978645082254	0.971160723314525	0.969799149096751
597	0.939573051254458	0.970508460745195	0.980023681142742	0.988345139201426	0.968183056044379	0.966598098427029	0.983922416494489	0.971092404354328	0.953301543350159	0.87591794959628	0.924737548660982	0.976486322493234	0.970879315382423	0.985192612818278	0.965091983958784	0.993434776727923	0.870125615100709	0.971504772281771	0.91040918778794	0.987504809294306	0.939965286185265	0.98570576161308	0.953007154253911	0.935473082167543	0.98898718557942	0.960716576924463	0.950277820233298	0.936940431297081	0.957250906355297	0.965861686248767	0.96970931107248	0.97131966510251
598	0.941115533112271	0.972822250323638	0.978755242497098	0.98738305074182	0.964624341201559	0.965348057923519	0.983309976776673	0.969675583986444	0.952490316095078	0.878087487620092	0.92446246706973	0.977377276661469	0.971939088183373	0.985046480807737	0.966923462200673	0.992693103918537	0.87126508862682	0.96934405247622	0.908869361457357	0.98757734154249	0.940615568434426	0.983638428906103	0.952436298451855	0.933679842556135	0.987733816106136	0.961952977827374	0.950357631729352	0.935859409134179	0.954944364460981	0.963937123194293	0.968305247201461	0.972236145142926
599	0.942057766639324	0.975907724208571	0.977438651759825	0.986577495162568	0.961382131338318	0.964101674116376	0.982607456841684	0.968480440280455	0.951583119679017	0.881775556790043	0.923936970702522	0.977879894907128	0.97386849305623	0.984847775668698	0.96869854750768	0.991943542668763	0.872329587810279	0.967417817303442	0.908037802858102	0.987598927405515	0.94101354470314	0.981644410657906	0.951854506840125	0.932280590194769	0.986567097816772	0.963333264072455	0.950416828201098	0.934638908759297	0.953042361056305	0.962279262421287	0.967004247285981	0.972588018004672
600	0.942528994343687	0.978822402314637	0.976115844756454	0.985969869662237	0.958557633489306	0.962883843554454	0.981966151967153	0.96753855843774	0.950676803321188	0.8869683069982	0.923869624762703	0.978177815361684	0.97548008037596	0.984795406330488	0.970995034349421	0.991120317690665	0.873358309695077	0.965793793739307	0.907103087543852	0.987325831555156	0.941316821154524	0.979768735319611	0.951403038853496	0.931392225390018	0.985527976655374	0.964115211085854	0.950157401438661	0.934260638774018	0.951650832310433	0.960967124022236	0.965836182560677	0.97281106120291
601	0.943216580028909	0.982182230395063	0.974895793229232	0.985588262820211	0.956249324300408	0.961719223157032	0.981124988706129	0.966887065047024	0.950089535705609	0.892972082528336	0.924007346811443	0.978534830373515	0.976777098070523	0.984708163098931	0.973347433836065	0.989845857481697	0.873813243320729	0.964506440263679	0.90617995046329	0.986787656319664	0.941552672160207	0.978058762545908	0.95104552380465	0.930995306608888	0.984729545223841	0.963848192038823	0.94980223588638	0.932833095405945	0.950861371165052	0.960052699486802	0.964847140802611	0.972968924412513
602	0.943925848338227	0.985461684065335	0.973776905593184	0.985464348194595	0.954552147179846	0.960636095766247	0.980148178429532	0.96655667298923	0.949785368901976	0.899035756234348	0.925059840777129	0.978621121745306	0.977976215422693	0.984707674802951	0.975887825711663	0.988868010467532	0.874088495778422	0.963595154428055	0.905551070543853	0.986436675487647	0.942181987229395	0.976551231912435	0.95077959199796	0.931131575592192	0.984012731672519	0.963235670793588	0.949698938021583	0.931292906159861	0.950730533228241	0.959561579077407	0.964068461723113	0.972861979013172
603	0.944442966201444	0.98840433907225	0.97268632162233	0.985596333216707	0.953520964387483	0.959628185670933	0.978578823823359	0.966572462505092	0.949453127541158	0.904171093110281	0.92681932894078	0.97798800495152	0.979012462447102	0.984461161533909	0.978239348299914	0.987620537513527	0.874274876620953	0.963090163028913	0.905909727194069	0.986146784112364	0.94276066704822	0.975257956009862	0.950700168824232	0.931809776311822	0.983467802733433	0.96213072458117	0.94959106635642	0.930000352603725	0.951278150249861	0.959506839126618	0.963530115490355	0.972922656731075
604	0.944583405312513	0.99017919133428	0.971748491590736	0.985976310515104	0.953190814764586	0.958716742970636	0.977283379712075	0.966944824270235	0.949192741745752	0.907320806904107	0.928197127494331	0.977183815388601	0.978602509559759	0.983918615650919	0.980030721977007	0.986650943092531	0.874400601655454	0.962997090073549	0.907449940423752	0.985563061985411	0.943348571560874	0.974204033773039	0.950723723097588	0.933040338879343	0.983049867687394	0.960602660132522	0.949627780799491	0.929246261760409	0.952509781488317	0.959910881160946	0.963248759886929	0.972976164266552
605	0.945260256827849	0.991408302924247	0.971011690266841	0.986570781656355	0.953570729310983	0.95791072875805	0.976321024370569	0.96766963846096	0.948993223659927	0.907859005836323	0.929516163483804	0.97669016012264	0.977471945146094	0.983299378517031	0.981132582430447	0.986102852633325	0.87461533701191	0.963312252275322	0.909439423236846	0.984534577849415	0.943765106434761	0.973441399384681	0.950851462613016	0.934873627094498	0.98274235384473	0.957857692462784	0.950056310708856	0.928166309532035	0.954406020266787	0.960771332840077	0.963250339939615	0.972801873376636
606	0.945507890973268	0.991967765128195	0.970625792662843	0.987363236898851	0.954640743625686	0.957238636557343	0.975795265412384	0.968729061370308	0.948930144681612	0.906540235627518	0.931023175561579	0.97633395687404	0.975503093510261	0.982622935249211	0.982131832410882	0.985833544943039	0.875093668763331	0.964022693758207	0.911999190687841	0.983226079214707	0.944173450746266	0.972972524669301	0.95100332071	0.937308078180558	0.982654883611535	0.954626728832404	0.951008541528663	0.927731222421124	0.956921424736565	0.962075014783959	0.963537433931021	0.972588533356503
607	0.945283970986561	0.993079676357617	0.970543868284308	0.988327408934581	0.956399541827156	0.956730077930123	0.975706822463041	0.970100141459713	0.94900881692065	0.904694284985544	0.932736276563819	0.975922507291997	0.974335563259427	0.98198241499675	0.98259679881835	0.985827853903471	0.875408991624632	0.96510918120711	0.915067857876468	0.982288195059963	0.944735234419216	0.972786363445537	0.951265744170622	0.940294850637702	0.982883345091349	0.951611649907693	0.951866958200178	0.92790711093519	0.959987609905332	0.963794873580989	0.964102382702905	0.97227376310024
608	0.944583413454838	0.994044868584023	0.970648628153079	0.989409565236081	0.958825806785981	0.956388221857557	0.975662807280052	0.971742589892781	0.949351999196194	0.902857640451741	0.935092847443476	0.975654903236748	0.973461806685671	0.981594024374394	0.982409881631999	0.985690174382791	0.875775118738722	0.966522035395668	0.918893585964539	0.981779476586387	0.945141757659397	0.972895468989152	0.95169929706617	0.943682104524672	0.983417248437584	0.948284252049176	0.952629683750769	0.928870399459124	0.963518690661856	0.965884506880514	0.964932704190997	0.971961709156808
609	0.944233667783688	0.994145531791712	0.970918132875002	0.990539516705572	0.961809369271495	0.956217438946886	0.975990648024285	0.973593710596812	0.950029001270862	0.900653127443173	0.93746815767566	0.975709627508196	0.972518722496972	0.981353050163572	0.982201805667964	0.985721033449933	0.87601639168951	0.96820311922825	0.923288205606533	0.981486408023491	0.945637899042922	0.973287365053333	0.952147394908561	0.947292333832749	0.98412184829945	0.944964944518184	0.953035882821418	0.931612695145419	0.967407554595583	0.968302596006517	0.96600839892417	0.972088298219446
610	0.944445444535887	0.993605430383303	0.97151508440451	0.991673620852946	0.965241680696212	0.956244559673094	0.976628899389955	0.975586768554769	0.950866243481027	0.89744904009961	0.940302238904116	0.976242809038451	0.971606429586253	0.981311147914972	0.981843078278579	0.985700991026387	0.876386751392031	0.970094843072487	0.927410748757339	0.981256293764241	0.946548801433143	0.973943142755397	0.952648518938764	0.951133120214422	0.985012981422597	0.941522346399493	0.95327762636402	0.935410730565805	0.971524437018755	0.970979105769366	0.96728320928169	0.972489606187203
611	0.944807104306122	0.992889660241818	0.97242244476926	0.992776366301646	0.969004488586672	0.956466526357699	0.977366261206076	0.977647681659702	0.9518333489868	0.892871066937655	0.943003226239567	0.97718096457871	0.970888509943306	0.981394573807076	0.981078749518502	0.98542616592212	0.876991566185923	0.972115522901216	0.931899026102773	0.981315469610339	0.947550544620159	0.974839664237079	0.953147734021071	0.95505290351572	0.986123379994294	0.938949552188406	0.953636266347228	0.938701843873446	0.975709565949703	0.973835552533204	0.968732125118052	0.972522597398581
612	0.945110826901463	0.991846660553151	0.973469436287901	0.993818742097443	0.972973671345732	0.956858526439277	0.978399109434889	0.979692504537349	0.95287745664972	0.887168883758585	0.945278116299298	0.978074140515761	0.969952967018687	0.981301963230436	0.979824938465869	0.985380925317	0.877949808140002	0.974196642336742	0.936707381076845	0.981597698786208	0.948375323724137	0.975892369890737	0.95369631155684	0.959029713509044	0.987339971260039	0.938086695111432	0.953938780262951	0.943002578773403	0.979798565321843	0.97679022248371	0.970285160234647	0.972075287860936
613	0.945399502043476	0.991030283827828	0.974651415107305	0.99477614417919	0.977010297820321	0.957402745941136	0.979769716522935	0.981658136198932	0.954057402490085	0.881240072763298	0.946778654326283	0.979213834944604	0.97001927710476	0.981391260054888	0.978584365273914	0.985328745066182	0.879031007333666	0.976257872492416	0.9412900026244	0.981609767632763	0.948920697307995	0.977038765022702	0.954316639427761	0.962910670750664	0.988739327557766	0.937680683932509	0.953833841848368	0.946826030108408	0.983645416354361	0.979756130784865	0.971885824282416	0.971568611687823
614	0.945486447470911	0.990214639123062	0.976072815179144	0.995629504092958	0.980971269784373	0.958069379035486	0.981710704940726	0.983471763477785	0.955363173222116	0.876520099739393	0.946924902161739	0.98149055318669	0.970588480871238	0.981842869458513	0.977531816115199	0.985736922687975	0.880496457326286	0.978209023922293	0.945152351443637	0.981020568774599	0.949422329118653	0.978280677920849	0.954839480915228	0.96664955470815	0.990111578747445	0.937968714840427	0.95346697152125	0.950530209946742	0.987124653277737	0.98264175909705	0.973472236242772	0.970942466445149
615	0.945822646278919	0.989962301696276	0.977635225418103	0.996359152256427	0.984697592920396	0.958823271012474	0.983778276750884	0.985053678226261	0.956833552830229	0.873733528699693	0.947437141013287	0.984110972190472	0.971748650800578	0.982411280414147	0.976898991876327	0.985465931751401	0.881699517536639	0.97998668820875	0.947786509414328	0.980765622231252	0.950234693196225	0.979588345518665	0.955259952694352	0.970169264879605	0.991437619261381	0.938822166157194	0.953050331096536	0.953412587904439	0.990118285117794	0.985367960075225	0.975004792992216	0.970471848539621
616	0.945908309570088	0.989559766674587	0.979213234382178	0.99696440788208	0.988057475486824	0.959637656992457	0.98546873836581	0.9863368530557	0.958399126336577	0.872724744485501	0.947975020181248	0.986379104355152	0.973349743706081	0.983110849005965	0.976093441859675	0.984432907716468	0.882656642670921	0.9815299244965	0.9492427912914	0.980863618524654	0.950937238705752	0.980871152597726	0.955667731489628	0.973262043177223	0.992743236464632	0.940756035287827	0.952485604961292	0.956126278835103	0.992529424600638	0.987857093434017	0.976426007992307	0.970065687432739
617	0.946206241898047	0.988452407845465	0.980708722539468	0.997434876608144	0.990927780421562	0.96045054556923	0.986990649224145	0.987305772598519	0.959671123609692	0.872996791474863	0.948247402631495	0.988077972612575	0.975678432334165	0.983877960548756	0.975421616386865	0.983350134188936	0.883330703500185	0.982786552542938	0.949799908535374	0.981218226391103	0.951542971562212	0.982101878477999	0.95610727551661	0.975763074847135	0.993865468904586	0.943689968271094	0.951819170315179	0.958987914447616	0.994267093706844	0.990018674226568	0.977680804617471	0.969671997309163
618	0.946966397323727	0.986497343100926	0.98213131107744	0.997749641617087	0.993209045028477	0.961207907899354	0.98826003736041	0.987934905901552	0.960853390201393	0.874127135001789	0.948399735030259	0.989548702358444	0.977067036395755	0.984603756151706	0.9749802021201	0.98215087210521	0.884122538674916	0.983709217877617	0.949599365783747	0.980980566856571	0.951967880301475	0.983230709644123	0.956438204686872	0.977544348513329	0.994802094372052	0.94667380391649	0.951483325171592	0.960900944011233	0.995279840543827	0.991777884153574	0.978721127207313	0.969372854873181
619	0.94835477323318	0.984279362021425	0.983612345359931	0.997911730088575	0.994805975199633	0.961885513439611	0.989495434405412	0.98820412152435	0.961954688077777	0.875536619678905	0.947966986294738	0.9906202333524	0.977993166809796	0.985082718059521	0.975134428646841	0.980867002311329	0.885096475573336	0.984270473057562	0.94878950541515	0.980345956810171	0.952256842521823	0.984222630761769	0.956491238867494	0.978678725277962	0.995525331083346	0.949713576795833	0.951195875490194	0.96182117408568	0.99554416422837	0.993101126045542	0.979514536187783	0.969126093257685
620	0.949514161946788	0.9821349755897	0.985059709054897	0.997928126235812	0.995688667929958	0.962459561571006	0.99030362925058	0.988137309687658	0.962708522314242	0.876515834065624	0.946642146288993	0.991970008070149	0.978383165362306	0.985433743842923	0.975122606692271	0.979257529035327	0.886434377570705	0.984471550010637	0.947437107903563	0.979485273513595	0.952115847139524	0.985067594295423	0.956542115001354	0.979146422789809	0.995920978242815	0.952727392485479	0.950748236790896	0.96134676600742	0.995073373389445	0.993967189967434	0.980032231637042	0.968862380149963
621	0.950503910144278	0.98008818351025	0.98619167891615	0.997802028977784	0.995863282641511	0.9628949305149	0.990871556711009	0.987785243066367	0.963386216822645	0.87701015587584	0.94502711243259	0.993171621294237	0.978655436289644	0.985515365642844	0.975432569881518	0.977928058516884	0.887678278574764	0.984318266044034	0.946132336785305	0.978355335519828	0.951845011566623	0.985702832141755	0.956587590222382	0.97897480610463	0.996110679992049	0.9553269430766	0.950356782119756	0.959041317926717	0.993933458108093	0.994393199273472	0.980274665706124	0.968526915383041
622	0.951199213233098	0.978010598122537	0.987058370656078	0.997555133648477	0.995363798087172	0.963174389580811	0.991427781001885	0.987205833081116	0.964115949845919	0.877993783841826	0.943220115934807	0.99415500386917	0.9792265008997	0.985410057751111	0.97537470970646	0.976521874298522	0.888555803832842	0.983847785035863	0.944685963892742	0.977021127161101	0.951625477954823	0.986098391967224	0.956538284806694	0.978269351433102	0.996059977959354	0.957051335022721	0.949945770508932	0.956606534627817	0.992216041811887	0.994411778758546	0.980234002245347	0.968637887633741
623	0.951794424218396	0.976498268187842	0.98777757344244	0.997205360213238	0.994236496987438	0.963299901895326	0.991651288820674	0.986474481478341	0.964679501221316	0.880449805363629	0.941519510300281	0.995147835792056	0.980136116763995	0.985486489894045	0.975923688535391	0.975057794781811	0.889510647552911	0.983088595987863	0.942671359626323	0.975475700653978	0.951808168258286	0.986334210492789	0.95645109519056	0.977074678018181	0.99578564645329	0.95764360071891	0.949436265585648	0.953006437577033	0.990028515869562	0.994051895026007	0.979934667707565	0.969084243491983
624	0.952393756707051	0.975120593230215	0.988401130708066	0.996775988631587	0.992572254440966	0.963270476148291	0.991614772579857	0.985640600303616	0.96518709229611	0.884075032838262	0.939635769827084	0.995780089114972	0.980426921430737	0.984992407458084	0.976298982412998	0.973704875205931	0.890327696408871	0.982086962733084	0.940618456778369	0.97407432371306	0.952202688384666	0.986440620382431	0.956305350522599	0.975424666845777	0.99531817901033	0.957776899936117	0.948930848498796	0.950199283329469	0.987496724523402	0.993378508955863	0.979404307721162	0.969630812856317
625	0.953260725224079	0.97317428237569	0.988765597448985	0.996286154189814	0.990478560255442	0.96311088864443	0.991456854192364	0.984770432104261	0.965828330776997	0.887696260015133	0.938165754708392	0.995664017207388	0.980937092806168	0.984159597720728	0.976599709689249	0.972233001744173	0.890478015298757	0.980901336910367	0.938178197061704	0.973161129330165	0.952549836582495	0.986385933277022	0.956253658079607	0.973354957337	0.994826922246762	0.957445232848209	0.948636230154438	0.946791850392718	0.984749013746169	0.992502014525555	0.978675363162122	0.970106335078106
626	0.954097511208374	0.971356622168031	0.988850679839457	0.995760017807536	0.988094174297569	0.962848726059776	0.991240497770156	0.983955355900906	0.966506524707954	0.89053619575155	0.936428693625685	0.995235412053226	0.982059714931726	0.983432015281003	0.976776968687155	0.971429014442708	0.891266217788569	0.979570894472267	0.935581038017079	0.971706167604824	0.952814694937621	0.986172792016839	0.956347183251927	0.970940507650541	0.994199113591427	0.956774424527198	0.948377907949731	0.944176358151834	0.981907536018538	0.991494464668301	0.977782933691465	0.970374740738806
627	0.954751121809022	0.970236008639215	0.988777140117531	0.995215407357134	0.985554597791782	0.962509551968681	0.991293685456548	0.983266452281738	0.967108951921221	0.892391418659746	0.935552655187249	0.994717083091887	0.982985452422373	0.982654154925352	0.977349248612101	0.971159962965401	0.892503608522609	0.97815733938881	0.933570159920679	0.970134596562025	0.953265844503429	0.985875515454937	0.956606290108348	0.968393221663699	0.993490977994623	0.955975837440629	0.948232340920063	0.942251454977442	0.979074773152179	0.990434841444064	0.976778131042342	0.970911590932343
628	0.955432214734648	0.969883508653953	0.988587650379128	0.994667879631577	0.982972800125539	0.96213776055766	0.991266110022073	0.982730260896965	0.968099011766206	0.893098338999429	0.935580461257154	0.994484282556594	0.982996359713134	0.982077494919767	0.977728009648914	0.971517588460383	0.893668262211265	0.976717042419753	0.931898113140386	0.96832402707888	0.95377731882694	0.985517889153829	0.956977655249891	0.965822993830745	0.992866899017852	0.954569667187965	0.948095274779872	0.939376129238805	0.976334778395485	0.989403270895604	0.975706414874569	0.971543215294931
629	0.955979098438825	0.969783222938601	0.988355880902353	0.994160404170644	0.980450159688734	0.961770448212232	0.991259137406778	0.982394133044948	0.969076002746439	0.89224328413879	0.936106043645247	0.994634687639301	0.98319390715046	0.981650585862837	0.978222154199972	0.972083250059474	0.894722689494601	0.97530663302857	0.929917687793855	0.966822312949118	0.95445558748984	0.985146135944494	0.957528415381293	0.963480989198217	0.992171604746052	0.953476652480918	0.947747762211191	0.93698169021813	0.973750469732106	0.988459956629568	0.974629302057753	0.972235142989253
630	0.956164233094236	0.970242225780722	0.988042869583004	0.993717147784786	0.978107227718466	0.961440009873026	0.99128923632131	0.982310310216089	0.970137327160654	0.889877252307775	0.937289178385566	0.994695277281053	0.982991724786061	0.981324152968936	0.978337537714216	0.973146009012698	0.895584908586108	0.97398025610911	0.927314889818458	0.965642283181525	0.955487380590614	0.9847932749474	0.958318471360364	0.961295612748739	0.991498653153341	0.952962445448006	0.947433602507908	0.935660942122226	0.971375119574807	0.987672931188942	0.973604671266868	0.973256342293823
631	0.956461439809786	0.970846660062411	0.98779063259828	0.993369059702671	0.976057232770112	0.961168940520466	0.991592526250382	0.982491539792908	0.971449051927356	0.887100235753876	0.939825179693518	0.993949889845823	0.983089824148245	0.981056779081338	0.978741932031104	0.974487946578133	0.89594942711812	0.972780011910133	0.924462325348708	0.964716704660198	0.957162389584336	0.98448421784232	0.959219723781213	0.959416455053044	0.991022233302375	0.952456568878021	0.947406203331387	0.935349682735203	0.969236181374415	0.987106718484809	0.97268614057139	0.973962033929295
632	0.956730121826905	0.971799968987328	0.987789570453432	0.993148252982482	0.974372734146828	0.960980718928276	0.992149765812812	0.9829203813492	0.972762343729386	0.885107948138894	0.942654705731677	0.992984277543625	0.982951088935256	0.981000264163042	0.979043751738515	0.975023534266498	0.896332187250015	0.971752045225087	0.921388066767631	0.964214796072132	0.958855862534842	0.984294844108954	0.960217584844206	0.957829986677482	0.99046363885566	0.952551864710394	0.947325973122577	0.936024769497307	0.967328588201729	0.986767318794278	0.971905031370516	0.974717206862261
633	0.957397662591347	0.973671368532262	0.987932654974879	0.993042892176759	0.973106432263736	0.960893494829027	0.992662165461045	0.983561700486101	0.973993728833523	0.884000761255919	0.946089913673179	0.991814876790054	0.982615887932778	0.98084503999625	0.979899603164519	0.975760160794165	0.896791815560244	0.970940661992309	0.918175073132685	0.964032694754362	0.960368894255378	0.984278683765789	0.961392901940729	0.956392396786156	0.990014522206231	0.953049682126432	0.947191308709446	0.936652706373541	0.965662700758676	0.986663150259861	0.971298076095016	0.975048554739192
634	0.958190062115685	0.975014542735008	0.98819534352506	0.993041803931606	0.972305584734204	0.960921220204011	0.99334134888543	0.984379979873844	0.975313391893379	0.88284226966915	0.94980667304997	0.990543175988396	0.982838324526015	0.980526850970489	0.980360119681821	0.976525332981677	0.897065078153323	0.97037725456493	0.915821906092746	0.964328748937791	0.961261036376861	0.984412486644626	0.962648972378096	0.955189720529355	0.989776336914584	0.954177063626126	0.947018498225426	0.938175837145403	0.964249830385708	0.986813403147755	0.970886914362401	0.975257204958353
635	0.959056941931712	0.975485395061597	0.988542766494898	0.993132213751648	0.971973400681035	0.961081328672932	0.993989895744865	0.985346719192654	0.976283609573284	0.881080031011824	0.954466480699802	0.989293652169726	0.983382947898651	0.98080561681231	0.981252038564618	0.977501863399161	0.897719036870831	0.970072113584059	0.913820473392091	0.964724718698852	0.961970797730068	0.984697085189856	0.963937655559259	0.954422667894488	0.989637376901509	0.955475315713488	0.946991428404518	0.939326433725577	0.963063007428512	0.987222327194936	0.97068933498652	0.975409719814699
636	0.959981697691018	0.976347670136484	0.989098660252226	0.993303609752102	0.972083859039235	0.961364664175199	0.994307442664829	0.986414897900004	0.976843169485843	0.879456921756124	0.960108470178088	0.987951715477075	0.98349004629799	0.981545389881036	0.981947748794763	0.978232426283676	0.898953927045016	0.970022850424256	0.912653628506687	0.965328949183568	0.962901244377203	0.985151229052678	0.965216792687033	0.954148391679426	0.989542652319416	0.956788456169433	0.946905009161807	0.941139555788318	0.962068042242961	0.987835702956939	0.970702876060645	0.975612034488989
637	0.960714180938719	0.976922129639128	0.98991829942279	0.993545327225709	0.972578251491532	0.961744528398834	0.994449559922462	0.987525227122266	0.977009721485729	0.878600273107517	0.965841517042937	0.986570364448137	0.983217560405402	0.982438499474016	0.98269771280589	0.979004592470914	0.899505618695739	0.970224690376098	0.912632409058515	0.966763043245055	0.964008728342252	0.985743936355897	0.966437153273178	0.954279522970048	0.989700822109499	0.958098659507629	0.946812009407602	0.942495800025381	0.961236968645822	0.988620962496932	0.970901629201278	0.975500460694459
638	0.961837926320074	0.97692105237037	0.990863317844357	0.993831437243825	0.973370239514226	0.962199729520945	0.994460487574658	0.988628710306471	0.977251433536771	0.878597539528055	0.969371657807726	0.985271342919082	0.982627527776679	0.983338596806619	0.983213658865292	0.980087377138142	0.899420811985641	0.970642944599047	0.912674965847836	0.968280718676335	0.965103616366918	0.986409044836222	0.967474767853084	0.954751638124294	0.989994484524698	0.959338983839177	0.946422340373251	0.943359896546823	0.960557138617318	0.989532288576343	0.971260872967129	0.974634880356732
639	0.963007170717078	0.977072532338202	0.991901470121206	0.99413593846165	0.974407591026458	0.962727058560582	0.994436472377485	0.989698095356824	0.977323243700132	0.879640194888666	0.970747591898476	0.983759624767657	0.982885767979252	0.984170524806367	0.984048470355494	0.979961777656093	0.899435658004828	0.971234252322878	0.91317339917165	0.96989488256161	0.96625267886049	0.987131632865103	0.968356856405043	0.955642454258081	0.990225841668984	0.960195496849371	0.94566974143031	0.945012094240046	0.960029126726355	0.990535175086438	0.971772542376539	0.973423146971902
640	0.964179003077505	0.977646081769736	0.992926048203688	0.994441286970732	0.975607897724352	0.963309151706229	0.994486214586304	0.990690982500915	0.97734996046318	0.882163238967109	0.971269823388669	0.981623771328868	0.98352960877213	0.984749642023662	0.984707198257305	0.979519710970188	0.899357629744209	0.971937366490196	0.914712776592149	0.971416287808706	0.967443966143021	0.987909266342093	0.96906228455991	0.956708552442525	0.990525875133446	0.960435812452133	0.94490587481286	0.947064223605064	0.95963798805223	0.991607921764575	0.972394120324555	0.972202290010648
641	0.965294649380809	0.977814364865232	0.993867536591857	0.994747916602766	0.97688135238025	0.963907213808285	0.994685144805404	0.991564482527614	0.977185753559642	0.885917633344718	0.970989931155553	0.979662635704846	0.985262155614264	0.98515732368974	0.985255004137944	0.978466314162141	0.899712892696987	0.972697060998607	0.917715002925093	0.972713665235478	0.968557312624688	0.988716950810039	0.969618318825263	0.957933601637907	0.990848861540651	0.960033997381674	0.9441825393362	0.948209992167424	0.959358098788133	0.992668697335213	0.973081706863084	0.970510506445412
642	0.966162209699031	0.977790054830574	0.99472370379674	0.995039547527266	0.978126511588442	0.964486495898524	0.994770870540524	0.992286776832225	0.976985982369629	0.889467584323318	0.969908078102087	0.978451013892603	0.987237142499892	0.985409865689673	0.985444551316269	0.977430326584279	0.900493100980439	0.973447287873644	0.921375245790549	0.973753732506742	0.969297257480944	0.989515680015855	0.970020718371289	0.959172276282469	0.991151447934634	0.959502966476708	0.943662280414444	0.947938359391698	0.959181597946677	0.993634213399018	0.97378595029749	0.96906586168512
643	0.966789821203375	0.977436316670445	0.995521716633546	0.995279649242762	0.979245418554077	0.965021368567029	0.994343864905741	0.992848567753837	0.976800740535283	0.891654309768365	0.968705893869859	0.977274159787132	0.989273921193651	0.98563718932447	0.985542237234781	0.977235475461281	0.9014456297826	0.974131817026408	0.925989118917185	0.974475500806732	0.969982435796202	0.990266512232571	0.970219993866137	0.960389012528126	0.991668506865275	0.958216376404746	0.94349368115509	0.947819055125948	0.959096840207305	0.994478890298438	0.974456508245829	0.967674001801557
644	0.966978230679191	0.976296820974916	0.996202252566728	0.99546789718693	0.980150770122612	0.965494121904852	0.993798242933028	0.993241788702346	0.976517841269264	0.89273878476561	0.966148794235283	0.976256929375961	0.990422693189608	0.985927892260334	0.985547021147992	0.977258414205459	0.902584353980221	0.97466616733437	0.931129070781342	0.975015318294046	0.97072983634941	0.99093208669493	0.970233795417743	0.961771352707641	0.99207252409321	0.956717813706725	0.943417685151271	0.94813798765789	0.959064287735	0.995151331397994	0.975049398491071	0.967043530987092
645	0.966961487981125	0.975387102977651	0.996745425920269	0.995614907321068	0.980768787255622	0.965879212894402	0.993214736458344	0.993449304146945	0.976172030431874	0.892969292619058	0.9634390346553	0.975562124362634	0.990426054100097	0.986332045292285	0.986023124235382	0.97744531158641	0.903550411289394	0.975001594898519	0.935664571088176	0.975018394224913	0.972236793234222	0.991456102857185	0.970101687396606	0.963241237410572	0.992304594196121	0.955334622189713	0.943579099803217	0.947984651016833	0.959017858566926	0.995606759501937	0.975526582304357	0.966677125732842
646	0.966970724085529	0.975376759215743	0.997025246448612	0.995715453421052	0.981035507200877	0.966111677163581	0.992606660876625	0.993456033112396	0.976215860829697	0.892116736473721	0.960261067892535	0.975043840145662	0.989560808564239	0.986666878803361	0.985778518104735	0.977899409910894	0.904124514708126	0.975110898132651	0.9401548077026	0.975042203240261	0.973891298377596	0.991819200728677	0.969816129574816	0.964570472950196	0.992439513841872	0.953943047049928	0.94358942027465	0.94741572197555	0.95893055782362	0.995790564283227	0.975843740287166	0.966499984705204
647	0.966995767032836	0.975141272417742	0.997044978084688	0.995773999808	0.980916465377564	0.966177480832439	0.99234905250568	0.993259424795331	0.976563412055696	0.890030413163532	0.955965996775458	0.974968790113582	0.988356007721852	0.986581227578341	0.9858052582317	0.978392643519524	0.904013636457326	0.974977724103707	0.94445502303714	0.975121095119577	0.975638963948521	0.991989121203123	0.969386990653752	0.965583740609807	0.992383199978072	0.952428673087268	0.94360282480391	0.947102842205754	0.958791060332	0.995679224637833	0.975986556105258	0.966432881548865
648	0.967236164916894	0.975587102035598	0.996813721585008	0.995780519104962	0.980391521690475	0.966076431177461	0.992155241833492	0.992862896398028	0.977415307655173	0.887230043503986	0.952005579106326	0.975184173947512	0.986438849728841	0.986200680118027	0.985487206410716	0.978417873199546	0.903809963915854	0.97458634136525	0.94830119723872	0.974613694227693	0.976975333882019	0.991978157583575	0.968862223601478	0.966301606604099	0.992117194765505	0.95117783213531	0.943648209094463	0.947213125457256	0.958579987816918	0.995259862328429	0.975943520881209	0.96702703724907
649	0.967347159824166	0.976432080097013	0.996510512063219	0.995741764340909	0.979496444067132	0.965811625616536	0.991971667642002	0.992268977796785	0.978262854171963	0.884200405898695	0.950261882230353	0.975498112699172	0.984727918789516	0.985865348525745	0.98556554536286	0.978341726471677	0.903880432618712	0.973938922746264	0.952742015682288	0.973957508737183	0.97801463098786	0.991808053159399	0.968338347784542	0.966683338383275	0.991683975245373	0.949905975974436	0.944038959919387	0.947347987807113	0.958273671560893	0.994540891792608	0.97570685831822	0.968513169544118
650	0.967275517207538	0.976697884877509	0.996087238181349	0.995670510729561	0.978270890502105	0.965357368368279	0.991850961602725	0.991490773015175	0.979148744084398	0.881010583948865	0.950286742556378	0.975811978032138	0.982780582011739	0.985465779060424	0.98515160396414	0.978980685533611	0.903790649268338	0.973051166953957	0.957007148353796	0.973415542716795	0.978808314151842	0.991447937644779	0.967833972485984	0.966511419216523	0.991194805759184	0.949455109036649	0.944983976500614	0.947480795342951	0.95785579794798	0.993551025627574	0.975268262538219	0.970174831217718
		0.976634260588804
		0.97662688265836
		0.976371795514474
		0.975470399021209
		0.974275120339263
		0.973019173920055
		0.971334792729896
		0.969896077890478
		0.967465494384907
		0.964845943720369
		0.962533725611068
		0.960176193007018
		0.958080255514749
		0.957354244006153
		0.958257303510452
		0.959798578928419
		0.961777732874599
		0.964427267912778
		0.967366011155348
		0.970564724877052
		0.973793746200212
		0.976856457611781
		0.979965293868316
		0.983386086017489
		0.985745273453572
		0.987095598462206
		0.98807873352856
		0.988424991206159
		0.988526386119829
		0.988470312621601
		0.988759918608542
		0.989106535533015
		0.990055698491049
		0.990799676432863
		0.990470844745285
		0.989769271461453
		0.988910331059501
		0.988269541277247
		0.988290236036333
		0.988138500474732
		0.98817275797425
		0.987892770020198
		0.988193797383839
		0.988485919095061
		0.988956583147348
		0.989673292964351
		0.992105108317077
		0.994402567260234
		0.998116830184568
		0.999260521661988

## Sheet: Cornea
WAVELENGTH (nm)	Physalaemus cuvieri	Boana geographica	Bokermannohyla astartea	Bokermannohyla hylax	Bombina orientalis	Hylodes asper	Hylodes pipilans	Rhinella icterica	Xenohyla truncata
280
281
282
283
284
285	0.509532557923024
286	0.496874251565144
287	0.492241746043374								0.650880546874119
288	0.490435825672964								0.660543726324677
289	0.489796026722718								0.672669224236427
290	0.491059700875012								0.680425331528459
291	0.494701482429935								0.686288649261548
292	0.500787524835822								0.692631529575448
293	0.507722318650625								0.699180270818464
294	0.515743343843351								0.704125883371541
295	0.524157239970226								0.709635427509691
296	0.533077482365235								0.712901699696334
297	0.542574931003235								0.715446961001638
298	0.551585426751012								0.718291882222986
299	0.560273461691448								0.721016559504653
300	0.568666050941202								0.724132143846621
301	0.576463280340365								0.726798978274749
302	0.582970231908481								0.729296480383558
303	0.588836972828608								0.730307916558296
304	0.59398917497878								0.731536095555423
305	0.598643826248794								0.733489367629757
306	0.602899723092155								0.734597155032857
307	0.606878167524854								0.736424858765345
308	0.610134269294894								0.738348099170158
309	0.613514095808772								0.740115267795487
310	0.616614658001722	0.4911041377204	0.394943554647081	0.251751312086147	0.241745416116266	0.27538134116763	0.370387483359553	0.197303919495532	0.741208654023245
311	0.619744574103918	0.47962491941974	0.400680028108797	0.245790167170696	0.242407610057732	0.261550788913558	0.370663333198601	0.196060836255172	0.74182812377633
312	0.622967337687983	0.475709138026722	0.400471223713364	0.245195320968865	0.24425059722202	0.257610919949753	0.370866879929646	0.190366030490224	0.74258845623066
313	0.626456561855061	0.473931575266844	0.401129323796988	0.246974283376623	0.246546025044892	0.25697278387639	0.371597334361382	0.185836061246564	0.743088132378484
314	0.629921970877031	0.473628329471853	0.402648484484368	0.249777478107812	0.250191179814511	0.257755084906853	0.372683407209088	0.181721830883762	0.745039297486517
315	0.633705015311658	0.474976369557137	0.405186352542555	0.253825462634542	0.254626699531429	0.260685413876951	0.374659530311182	0.178450183959086	0.747560519967635
316	0.637580928412578	0.474554745152621	0.408060448575474	0.256651732520227	0.2582411170482	0.261870762237017	0.376752132121905	0.175280542190957	0.749964912703995
317	0.641681024725253	0.475747867948737	0.410877641077616	0.261417606359094	0.262751794680171	0.265115440343492	0.379562359707938	0.17209214698504	0.752967991880064
318	0.64597538413854	0.478526775219041	0.414847496364855	0.267129856062586	0.267419758376753	0.270454933668307	0.383158167093277	0.169906505816089	0.755957714574993
319	0.650855905028908	0.482276329859981	0.419834152354742	0.274056473917791	0.272538045756398	0.276106668066236	0.387347099103723	0.168719326764633	0.758695032255797
320	0.655750249719339	0.487114284347462	0.426049939024054	0.282041995942543	0.278154088750957	0.282713808091748	0.392437471794412	0.168282903754911	0.76185536444613
321	0.660744048382881	0.49304755470846	0.433068178952436	0.290850721406604	0.284390107761764	0.290394659141888	0.398606558006633	0.168752924465131	0.766012935274869
322	0.666117063655907	0.500584042765159	0.441233302210156	0.300959549608556	0.290926020027542	0.299766368636228	0.405895261015313	0.170219449720001	0.770915438844554
323	0.671675069029085	0.509232142863093	0.45047463660847	0.312424466751898	0.298141822519824	0.310338043203405	0.414409415657513	0.172979979691038	0.776116981706558
324	0.677644589556029	0.519386174629594	0.460663102065541	0.324977567533117	0.305628601619976	0.321915715064416	0.423815188310534	0.17691971030562	0.781369731368488
325	0.683921376682654	0.530739522451589	0.472416885728259	0.33886244880035	0.313459369262848	0.335134053667129	0.434471776745936	0.182536276649098	0.786236861401992
326	0.690465389920368	0.543305141844005	0.485179378369864	0.35401671802991	0.322377121393243	0.349107021738774	0.4458470010897	0.189759274175174	0.79095517944151
327	0.697194664804041	0.557806632279355	0.499222162060107	0.37058591435234	0.332274345115238	0.364155266470439	0.457942296794054	0.199029787300738	0.796273708094648
328	0.70419286055278	0.573745412327409	0.514533063779246	0.38812531168935	0.342740377999106	0.38044218130073	0.470891158669927	0.21019924175807	0.801989639692136
329	0.711290553766896	0.590475981639871	0.530548467787379	0.406821668622105	0.353947880795171	0.398767881234432	0.484266226305703	0.223769308422525	0.808082356152844
330	0.718374299926114	0.607965604752373	0.547781307061197	0.42655002933845	0.366417356864228	0.419196609798651	0.49898876575371	0.239584514539348	0.814584959268029
331	0.72575975273645	0.626340223981791	0.565984909162991	0.447411951353869	0.380131035909281	0.440474522702196	0.514111852533819	0.257939094879467	0.821153185328047
332	0.733344306399664	0.645212409247238	0.585163382957788	0.469212208266342	0.394628026378622	0.46287006220928	0.529550664673059	0.278865630495227	0.827563102339019
333	0.740804031803096	0.664272241824866	0.605111386611791	0.491776938637238	0.409690231850311	0.486298935893183	0.545248471481911	0.302344488129111	0.833098682429522
334	0.748222278102911	0.683806347964251	0.625587250476761	0.514844992054648	0.425092983937156	0.510557369145944	0.561266849143569	0.328419032826203	0.83868344978952
335	0.755377870275665	0.702957937334034	0.646590147274162	0.538390132357616	0.441584346794452	0.535782431617694	0.577182846937693	0.35686253518807	0.844507724749169
336	0.762476312648074	0.722024256468036	0.667289364753625	0.562048836524974	0.458858486407677	0.560698348391804	0.592903553590092	0.387068393799257	0.851073787933827
337	0.769317125453796	0.740471074272697	0.68794462635998	0.585781643807353	0.47636194305244	0.585820228947026	0.60897085119416	0.419048727702344	0.857185977530739
338	0.776032245290037	0.757893095360484	0.708278895200898	0.609090442124918	0.493731350170972	0.611387828489268	0.624783644690439	0.452434734850937	0.862161265848144
339	0.782170904189866	0.774682323485645	0.727501097403426	0.631952394768286	0.511332970441321	0.636596140637866	0.640135100912864	0.486789219251995	0.867073787232307
340	0.788101657219558	0.791429028239071	0.746140116048316	0.654048551846484	0.528713189742231	0.66066423250843	0.65505502515123	0.52143153602104	0.871645084182184
341	0.793902884824751	0.807064511622862	0.763808224085178	0.675121382456892	0.545586212983731	0.683359636878422	0.668951721300899	0.556202668320192	0.876042906552603
342	0.799284545268922	0.821940325282921	0.780331603194076	0.695129452372556	0.561205342385223	0.70509897636415	0.682514772525814	0.590469258292534	0.879809846123938
343	0.804327741866151	0.835769447324774	0.795606665069017	0.713910671635194	0.576267293679578	0.725739809684009	0.695086751325384	0.623761903302949	0.8830921577571
344	0.809156671488254	0.848693893607842	0.809689178129124	0.731255753762205	0.591359023031168	0.744755989452566	0.706842541871502	0.655873834613337	0.886950870230004
345	0.81372477076968	0.860355018805067	0.822740287830291	0.747272042906737	0.605572670991775	0.761918991551878	0.717636676019306	0.686225856536239	0.890488773126562
346	0.817977526408034	0.8712671825519	0.83433022804325	0.761913701927082	0.618086790173785	0.777570197346816	0.727493736169025	0.714763414412132	0.893329444482105
347	0.8217070671986	0.880840483051886	0.845009525831363	0.775161682627473	0.629509695790067	0.792086520593854	0.736598147605679	0.741388718393713	0.894809360587452
348	0.825205430065538	0.889647201404527	0.854412700837655	0.787195560905272	0.639803619461794	0.80518728410676	0.744513364371227	0.765761176110634	0.896856015358642
349	0.828409228446876	0.89788755343792	0.862728307560537	0.798174064581322	0.649233242044617	0.816011037702299	0.751907870230128	0.787534933465827	0.899569539290299
350	0.831543524582394	0.905184539145944	0.870792802648792	0.808076653277195	0.657673174929419	0.825506102102969	0.758706279278729	0.806864806949348	0.901536510138984
351	0.834505233135511	0.910898690712926	0.878056913720694	0.816924579286729	0.665272096762819	0.834015742251551	0.764592724634441	0.82396235599988	0.903412099503743
352	0.837063253970466	0.916121325876993	0.884525324792926	0.824910604135917	0.671844092281922	0.841590972541913	0.770206587505737	0.8386965278559	0.904877186706528
353	0.839523162031079	0.920719396818967	0.890508023394873	0.831850219343291	0.678018016068568	0.847970879102848	0.774998470893772	0.851493157201431	0.906157050489293
354	0.841773244728462	0.924802614774436	0.896148521911749	0.838126207075028	0.683809369469336	0.853282149882173	0.779511891004428	0.862574250105337	0.907866761372377
355	0.843923818405328	0.928294676208898	0.900777984638299	0.843841209597198	0.688457538797253	0.857755598908697	0.783908212807789	0.871764190197736	0.908914777554975
356	0.845877619590181	0.931033332743472	0.904804283074621	0.848769901893817	0.692546886865287	0.862166867638985	0.787696111781472	0.879485336180075	0.909515339825179
357	0.84776169320397	0.933528173244667	0.908706954802864	0.853152164478338	0.697113868288027	0.86599452355103	0.791544216631837	0.88577044127506	0.910813808627703
358	0.849702038427406	0.936341615233994	0.912019191609057	0.857256038209827	0.70111768055749	0.869645026830453	0.795159908512479	0.891463344524925	0.912783412936497
359	0.85155408433099	0.938915940305155	0.915070303044165	0.86069702435712	0.705082302540241	0.872386135013471	0.798451294307456	0.895978822503295	0.914049391826276
360	0.853172167270824	0.941152073689147	0.917700414806428	0.86366363434719	0.708836433080441	0.87550074056732	0.801326632679609	0.900098123982142	0.915002055941463
361	0.854753687400769	0.943030389761756	0.919787091751065	0.866260917533065	0.712287781832772	0.878146078263161	0.803929585567219	0.903713737388449	0.916313648417818
362	0.856180129838279	0.944821202435252	0.921606930075921	0.868631048343696	0.715535700413296	0.880113379768919	0.806592517444696	0.906821449686821	0.917362906975713
363	0.857836050840129	0.946346404864172	0.923124099984077	0.870682905739902	0.718890277259826	0.881807850356869	0.809000121077084	0.909793084151902	0.918601458071959
364	0.859302567678058	0.94758151779258	0.924293837536555	0.872785557738006	0.722285191863688	0.883658013383459	0.811281986731951	0.912265350155449	0.92014202059965
365	0.860861546156633	0.948446979373127	0.924992349945944	0.874570279075928	0.72469908309467	0.885352600371386	0.813542133126304	0.914381741575597	0.920598540151728
366	0.862079314809543	0.949187285259344	0.926084506403178	0.876184527864021	0.726867164260417	0.887103011274627	0.815095895500338	0.916583999315963	0.921847223691059
367	0.863216237752655	0.950205878782999	0.927062714108065	0.877897777441394	0.729379263672682	0.888500778722614	0.817063359758292	0.918818067084881	0.923466693301685
368	0.864312247794047	0.950567902929714	0.927617975298525	0.879360131296358	0.73161257437827	0.889472057458378	0.818850085080378	0.920905307093901	0.924551520808741
369	0.865405717630329	0.950253000541558	0.928255584750818	0.880632656324922	0.733594412732179	0.889856424799435	0.820614463174329	0.922202290979016	0.925031425464502
370	0.866421030127297	0.949840716600711	0.928774459858914	0.881877511526087	0.735258988051085	0.890675586681616	0.822589976102888	0.923755749452095	0.925737661425794
371	0.867722526032299	0.948806511783329	0.929305157560304	0.883169322833733	0.736496041774978	0.891240425363195	0.824429032287856	0.924970498898117	0.926182651690932
372	0.869064184341002	0.947793789389684	0.929762539535973	0.884424185723962	0.737412458338452	0.891881364103381	0.826291787157209	0.926132214036454	0.926458689092547
373	0.870499271740325	0.947164555165293	0.930037501523273	0.885572214994943	0.737996407719755	0.89280403201825	0.828100266656743	0.927130176192895	0.926707461926086
374	0.871683307546172	0.946594363500841	0.930449359399776	0.886838224899134	0.738113657326859	0.893638641357144	0.829547847466123	0.927822871067839	0.92689408570061
375	0.87295835741822	0.946148780238526	0.930770767190312	0.888063749465237	0.737677198440266	0.894426696502902	0.830939746656707	0.928468039627601	0.926999089962209
376	0.874130126269889	0.945852014239955	0.931063856076826	0.889354057721286	0.737924431704853	0.894960199513339	0.832043684870985	0.928949574976154	0.928109718925055
377	0.875470630990373	0.945477096323706	0.93122955565918	0.890622967565175	0.738549868574183	0.895502205479723	0.833540997649026	0.929361995597053	0.928542135859902
378	0.876766340951704	0.944947574024163	0.931524953026358	0.891859555523308	0.738815126797404	0.89592641845361	0.834644835751816	0.929328535105605	0.929218112077823
379	0.878046299330322	0.944982915343081	0.932123505237165	0.893301939695606	0.738693441073397	0.896701076932295	0.835760577550011	0.929257106672191	0.929754172759716
380	0.879181820375287	0.945254188872114	0.932851260679852	0.894647391085346	0.739056138892135	0.897654077086885	0.836707416715618	0.929336120117199	0.930681864484517
381	0.880437163959563	0.945683463201917	0.933799891743953	0.896059674385698	0.739455286499374	0.898529568264013	0.837473239563283	0.929027239002647	0.931788789397086
382	0.881462602611551	0.946701960052332	0.9347286405955	0.897342697544999	0.740025787889835	0.899514064335995	0.838337760422139	0.928812742264006	0.932785592744597
383	0.882186810382782	0.947935879848559	0.935582260234552	0.89859651648143	0.740935119048228	0.900546421856206	0.83894453512372	0.928587380649349	0.933955272125632
384	0.88282221497141	0.948799807243526	0.936694781835193	0.899679199173966	0.74242438344075	0.901599028302004	0.839461761418071	0.928427526939175	0.93548851416121
385	0.883379195196493	0.949456551336213	0.937828314471307	0.900666218147217	0.74445788670782	0.902809997823076	0.840061508244378	0.92835990639524	0.936711543100327
386	0.883816477644293	0.949857541034575	0.939077967458053	0.901399200734356	0.746780430204762	0.903769067968743	0.840839271364768	0.928395732516339	0.938048086705945
387	0.884224563726306	0.950360947633968	0.940426777333433	0.902073881000982	0.748581109616389	0.90511465339943	0.841869083859265	0.92859634676667	0.938762116781404
388	0.884676126025432	0.951020390581855	0.941561850888421	0.902868387094323	0.749788515075727	0.906257121714939	0.842880713958857	0.928330854993905	0.939752414265157
389	0.885201084401614	0.951871896364445	0.942648331451422	0.90336297970502	0.750800917201531	0.907459532274402	0.843962853800128	0.928317291788363	0.940180045199255
390	0.885688519384032	0.952703374068334	0.943459463002122	0.903704368134862	0.751594729079755	0.908616862906233	0.844859281166819	0.928275536415628	0.941143163790545
391	0.886244951116727	0.953478488480347	0.944165112728272	0.904240849860511	0.751935741511805	0.909731705573403	0.845781297176278	0.92810613914498	0.941941066663361
392	0.886634338594602	0.953885875521788	0.944516636342618	0.904674818560942	0.752334028354645	0.910676854869602	0.84664772425553	0.92825321358301	0.9426163440649
393	0.887011283111734	0.954134266261446	0.94490101638896	0.905195923074479	0.75317840311899	0.911379856056582	0.847308776084985	0.928435082483882	0.943646298549981
394	0.887669015372296	0.954219262086008	0.945162621257815	0.905717113161764	0.753982385238551	0.912090330838796	0.848345205655812	0.928457117403756	0.944365159909617
395	0.888149187906879	0.954387203856919	0.945213246981453	0.90660100558889	0.75427732385163	0.912474270628362	0.849406960795952	0.928714060765813	0.944527362583987
396	0.888733421894375	0.954701680722142	0.945065225887267	0.907469552989737	0.754386845951178	0.912593805151343	0.850524173598162	0.928905718224189	0.945214821700946
397	0.889339934821254	0.955421130054907	0.944703532661893	0.908423512558587	0.754622625253779	0.912757702318801	0.851499015021254	0.92901696003874	0.945411977974762
398	0.88997825653866	0.956098593897124	0.944370014654991	0.909365791157782	0.755168531415408	0.9126846050253	0.852202412300797	0.929231855072007	0.945798343478044
399	0.890530118841181	0.956694427650838	0.944187397185603	0.909986771524886	0.755881654299255	0.912875227683955	0.852853154160898	0.929784008086359	0.94582026811229
400	0.891186914465478	0.957140747381912	0.943785719975285	0.910793854318456	0.756578770952677	0.912979297638498	0.853591934258645	0.930334873978179	0.945774785918658
401	0.891822716324869	0.957239066707116	0.943644793426055	0.911629387933823	0.757669923335039	0.912967672940644	0.854367151031135	0.931047390330781	0.945027089586915
402	0.892371943134235	0.957442112647197	0.943375562293815	0.912050824366547	0.758543039348788	0.912989402654322	0.854971290944864	0.932004266415667	0.944631513323974
403	0.892910428226136	0.957893436700888	0.943468243537335	0.912450669272115	0.758942568181672	0.912888495992975	0.855713656743092	0.932759787422851	0.943628482874015
404	0.893354411525183	0.958196221077314	0.94342713602083	0.912821948925875	0.758939967000731	0.912901187415493	0.856785230817947	0.933372462474519	0.942327864725937
405	0.89368020306696	0.958392702303748	0.943800014041949	0.913078180646019	0.759033000909594	0.912786012234734	0.857719340685803	0.933977764841123	0.940969447725769
406	0.894275644536198	0.958622724209574	0.944087269332881	0.91295078548453	0.759490274409588	0.912903119067281	0.858706870824867	0.934355902562111	0.94004942574349
407	0.894880094954185	0.958852738731967	0.94454856707053	0.912821260776699	0.759889985420382	0.913127986591258	0.85991119043721	0.934817405470391	0.938724757125126
408	0.895361029290729	0.958778837146842	0.94525501654756	0.912817869936079	0.760623917428883	0.913403708061534	0.861120088025799	0.935451855790758	0.938064213996407
409	0.895650426786286	0.958717137354371	0.94590456648333	0.912779707067974	0.761676792674163	0.913759359878435	0.862556894348521	0.935649573912305	0.937541335880469
410	0.895995600946294	0.958777328784149	0.946620607868544	0.913137809818872	0.763518643244514	0.913935174334075	0.863877888967487	0.935578806311115	0.937413913758159
411	0.896172183425549	0.958769788041858	0.947408109697278	0.913614896627888	0.765870902162422	0.914026283507453	0.864843571898672	0.935347829145057	0.937596446837667
412	0.896395505695584	0.959042923190688	0.947944617939051	0.914254760702403	0.768136663621308	0.914044102246309	0.865794474565148	0.934954389577	0.938298367659079
413	0.896801136561384	0.959082688524989	0.948317974544552	0.915205177303778	0.77089715401982	0.914001036308049	0.86708953024881	0.934487786549961	0.938560940380562
414	0.897264751039789	0.958992971932244	0.948363826487406	0.916378579037889	0.774511927094278	0.914279045796838	0.868332805243257	0.933985891009412	0.939720088603452
415	0.897935149869813	0.958939250187887	0.948649407410169	0.917218143306897	0.777816591793864	0.914356463578884	0.869282846218416	0.93354511464679	0.941194703747118
416	0.898489933487758	0.959098925880283	0.948482510500715	0.918118674508308	0.780449431655202	0.914259421509524	0.870125436215255	0.933079164617399	0.942872770468308
417	0.898839342230057	0.959386124556333	0.948496500786769	0.919126236194513	0.782585150371876	0.914146294018165	0.870939550402857	0.93252097162062	0.944354580312405
418	0.899099087810962	0.959531431131543	0.948363561289611	0.919960568907093	0.784707900394314	0.914372877223857	0.871698267874307	0.931982568604599	0.945610737944605
419	0.899726822884242	0.959696617083875	0.948199030624806	0.920607630591064	0.786351221193034	0.914702764060755	0.872489191016019	0.931096585315526	0.946377764895979
420	0.900585791144868	0.959840121910131	0.948087962953588	0.921400276871415	0.787720614214716	0.914966080417831	0.873171460181174	0.930461061119005	0.94680281558194
421	0.901221111581927	0.959673856752372	0.947908594535143	0.921948858135626	0.788486410407227	0.915088867939698	0.873885316327597	0.93036204562046	0.946768197190308
422	0.901948748299312	0.959621556682316	0.94788958725484	0.922338949624035	0.78912982905168	0.91563719300358	0.875036298199665	0.930376311685811	0.946684329441973
423	0.902713272710253	0.959235992773706	0.948110265710197	0.922462021474258	0.789838643996969	0.91611920591426	0.876435727678687	0.930393864498593	0.946313355491788
424	0.903355990112057	0.959031032994211	0.948814466202839	0.922659544551671	0.79028547241478	0.916656568363037	0.877583039610118	0.930288498584435	0.946019995916789
425	0.904059926817077	0.958942663667596	0.949872934918028	0.92268201481712	0.789737651407516	0.916912706453083	0.878594223847329	0.930313790562819	0.945265542571824
426	0.904774863429971	0.959158174793787	0.951007934236531	0.923293959002131	0.789455230604397	0.917526263658754	0.879753757389182	0.930343385594927	0.944383264208267
427	0.905706321024035	0.959272027102419	0.952543900400617	0.924097471081819	0.789613865673439	0.918485727575358	0.880840273616347	0.93076230621792	0.943745817442212
428	0.90690596899731	0.959258552604832	0.953936681361758	0.925137164562185	0.789636774081712	0.919566739883526	0.881860672407897	0.931457366468764	0.943020716081451
429	0.908396997177577	0.95961900714079	0.955345144394507	0.926592800571781	0.78951535173676	0.920294454464687	0.882625075479327	0.932009007349243	0.942855026464805
430	0.909692319790494	0.960000218305188	0.9565473166137	0.928233517442526	0.788903207801221	0.920948077943754	0.883356445178248	0.932875682055785	0.94289303543337
431	0.910952335377752	0.960334360427975	0.957644697719465	0.929832382435912	0.787761381789231	0.921788526768754	0.884121338698298	0.933656434394756	0.943237037619385
432	0.912500815424816	0.960897487141624	0.958535217174995	0.931430469305219	0.786278248002269	0.922979898938378	0.88484413685164	0.934009305449067	0.943995780227986
433	0.91400448840399	0.96127725834529	0.959368430694116	0.932931891096963	0.784470223842349	0.923717744263342	0.88536884845751	0.934451586177186	0.944748882604207
434	0.915409521384593	0.962095608802484	0.959899396868903	0.93447094777138	0.783122628645915	0.924844932213076	0.885630977837562	0.935168942965653	0.945710145166641
435	0.91678476207233	0.963141287283599	0.959898056076725	0.935864985914401	0.782457077039886	0.926064607091578	0.886075170799386	0.936036121368832	0.946834772664943
436	0.918100878872775	0.964037739083867	0.95953518933536	0.937220772515627	0.782879725517017	0.927426715682265	0.886865293195701	0.93678787508677	0.947911933190661
437	0.91929919201796	0.964572916481056	0.95866796268721	0.938262480614802	0.783603642421952	0.928414329067238	0.887542326871892	0.937418602016892	0.949068876094839
438	0.920365752694596	0.965154238881292	0.957602940058911	0.939078849001965	0.784687568871212	0.929294273882245	0.88833459541433	0.937721156631906	0.94984529462402
439	0.921190467917492	0.965716692784383	0.956672248113829	0.9396121574571	0.786647345859384	0.929883892713855	0.889010744104969	0.937981938016427	0.951029642522235
440	0.921607606028832	0.96591695754207	0.955892779132605	0.939989969150974	0.788838276994412	0.930514661574722	0.889788043880092	0.938342827648411	0.952203225587196
441	0.921959944836643	0.965945576685111	0.955570585103047	0.94038147547654	0.791852779338592	0.931039968593386	0.89039816176818	0.938681634242902	0.953154086924944
442	0.922181516042322	0.965840726388166	0.955278588692866	0.940836224360902	0.795812172322905	0.931322905855694	0.890999164676232	0.939180390973118	0.95392326700864
443	0.922287231303822	0.965844862067097	0.955265874096395	0.941294235533908	0.800180312487723	0.931178071308416	0.891697922301085	0.939924272115626	0.954540490819085
444	0.922458475768576	0.965962854262835	0.955251575116327	0.942118149068633	0.804751681758694	0.931315977862708	0.892447727115375	0.940732764975919	0.955004291220553
445	0.922881124174867	0.965806656052654	0.955330308499141	0.94292819674763	0.808449983768888	0.93108984841964	0.893162605717514	0.941029654399404	0.955281533563691
446	0.92329136755142	0.965091027818663	0.955793557330354	0.943598326067636	0.811313359486075	0.93083534596871	0.893681758645238	0.941295479379548	0.955734820518042
447	0.923573572557984	0.964507130857392	0.9563712861599	0.944248091629449	0.813348342292852	0.930716627775561	0.893597170102953	0.941831579505964	0.9565575180004
448	0.923809520912623	0.964226428722565	0.95741465501028	0.944757382449827	0.815028062674199	0.930720952129342	0.893770753851037	0.942456786168357	0.957219387523319
449	0.924203917460284	0.963855362280457	0.958656679938359	0.945083517091233	0.81618145468315	0.930781423024871	0.893947096281044	0.942967974816695	0.957835381028788
450	0.924708185770804	0.963390109208098	0.959865600465054	0.945627999885756	0.816398009736283	0.931037260673329	0.8944391488337	0.94319458063817	0.958141705667284
451	0.925423594804742	0.963027225254862	0.960782251478233	0.945942057836331	0.816123856274957	0.931332011345596	0.895013219651654	0.943546131772574	0.958054206408936
452	0.926059656361735	0.963078720683736	0.961202144186505	0.945933311632899	0.815352876931175	0.93177025947526	0.895795406527764	0.94355367573987	0.958534224312712
453	0.926811313788508	0.963268057310104	0.961887154847013	0.945568346219522	0.813903540012279	0.932323576048795	0.896567902904871	0.943363096725174	0.959114440162908
454	0.927486540239116	0.963356326061353	0.962539758273974	0.945193224396337	0.812263622235605	0.933296012905954	0.897401083252057	0.943005709878264	0.959457434200973
455	0.927963839269764	0.963729570692733	0.963022369347385	0.94456967302798	0.810146766721966	0.934166647413804	0.898144076236547	0.94242533024996	0.960015173061662
456	0.928055551626519	0.964151055653656	0.963623309503705	0.944163080043029	0.80791786146088	0.93525947438008	0.8988077494731	0.942730201298562	0.960389066057338
457	0.928212641588105	0.964953947650362	0.96402268481606	0.944033812056442	0.806020718320353	0.936279583812311	0.899516618260544	0.942888861647365	0.960169582016321
458	0.928607796839611	0.965685252787343	0.964618702025711	0.943968939998972	0.804105404204425	0.937027707444521	0.900691282457313	0.942632523863154	0.959482099034838
459	0.929158526989536	0.966199105490817	0.965073382479946	0.944055566234953	0.801844800228856	0.937937056520459	0.901506210819901	0.942321619112473	0.95905723516274
460	0.929481770999572	0.966701666667993	0.965140587601223	0.94449297962317	0.799353034841916	0.938689053240125	0.902371584042614	0.942195062160621	0.95891706591329
461	0.929688781597499	0.967239904517323	0.965172626235031	0.944704081868947	0.797025695634542	0.939338312102534	0.903131626452978	0.942090361677934	0.958646017893394
462	0.929942360333753	0.967860870100037	0.96544447378604	0.945032857202927	0.795025812707806	0.939800189951043	0.903911127899473	0.942208817519452	0.95862216658341
463	0.930371294611018	0.968242843211776	0.965951636442967	0.945552610409014	0.793068042663186	0.940132669274329	0.904564172128451	0.942530108697782	0.958010521075918
464	0.930808103716711	0.968653070694356	0.96625604111782	0.946141891825913	0.791170816142161	0.94056266166211	0.905221161873249	0.943095139534998	0.957037014631965
465	0.931296791301508	0.96899145775558	0.966482430207691	0.946559470283328	0.789592052108406	0.940795993731249	0.905687124346671	0.943554469950202	0.956319128719965
466	0.931967784509551	0.968984930762477	0.966669356920776	0.94693093822995	0.789172644008885	0.940961490542811	0.906113425090399	0.943927784775895	0.955193357854557
467	0.932878839702345	0.968963292674547	0.96674264700861	0.947164287468706	0.789468261047018	0.940934262490383	0.907034696856408	0.943290396140563	0.954338441844457
468	0.933623691151209	0.96880975770311	0.96684671591474	0.947378676266882	0.789738911800999	0.940928081212713	0.908077244460007	0.942657272654831	0.953969116755391
469	0.933941511236786	0.968610239705079	0.966553836950234	0.947517052423139	0.790899198400417	0.940979533505629	0.908867272165505	0.942239781477217	0.953688218958824
470	0.933931312443471	0.968401003961425	0.966196610795891	0.947575743805691	0.793096704648651	0.940833849411645	0.909780466204161	0.94187195053764	0.952717271699114
471	0.934026489165399	0.96828323801244	0.966210474278344	0.947383173825588	0.796187564560051	0.940773533246352	0.910502232720831	0.941453569897741	0.951378892418514
472	0.934241985088357	0.968522701722424	0.966392863494951	0.947165443250094	0.800291299920815	0.940760471526154	0.910861713050961	0.9411292634226	0.949951805861294
473	0.934388892082148	0.968868733353077	0.966618414408608	0.94676467724034	0.805010447926339	0.941061169870878	0.911025166200175	0.939974500566607	0.948467536432828
474	0.93434578114983	0.969223769520323	0.966720363464668	0.946209205567242	0.810430486259067	0.941203637323354	0.911421260084955	0.9390152205356	0.947161808554827
475	0.934168194043192	0.969423642190934	0.966542891714396	0.945910132437171	0.816063271020754	0.941157221231885	0.911786173148097	0.937889704025496	0.946450119569472
476	0.934027643339748	0.969689561085967	0.96631644675031	0.945995455816669	0.821237154708052	0.941029179324041	0.912106062900942	0.936731176988712	0.945720936349486
477	0.933935978752615	0.96997627249369	0.966301569154009	0.946013373489849	0.825584180557836	0.94092110176377	0.91254040245063	0.935796134249889	0.945621265276537
478	0.933750595442747	0.970430206839642	0.966361711226505	0.945908534856434	0.829945740039984	0.940897474339908	0.912623152701825	0.935285777271942	0.945558517237687
479	0.93410530887385	0.971050466902808	0.966541238165199	0.945178334449412	0.834355581834609	0.940801659241464	0.912639269869991	0.93509899770949	0.945309631945043
480	0.934896034357133	0.971798008285654	0.96704254971467	0.944872070139398	0.837960956159304	0.940980169417509	0.912734584259401	0.935251219273736	0.945528070719899
481	0.936053597628563	0.972962156245985	0.96773654308434	0.944794926247742	0.84085305867758	0.941309136811347	0.912913785140974	0.935642148827565	0.946831898429534
482	0.937178543919475	0.974066940180117	0.968119065234301	0.945092839692793	0.843249044975871	0.941650898418828	0.913250746979073	0.936094557061692	0.948199486783312
483	0.938299185208724	0.974863554881481	0.968015405494982	0.945709402066407	0.844835067471615	0.942120786727772	0.914074909869464	0.936604415640064	0.950094422388119
484	0.939393246492374	0.97532474916973	0.967729074238838	0.946437388731092	0.845838143734963	0.942364977614319	0.914999746532298	0.937705157697874	0.951669954096225
485	0.940669004912257	0.975548017950469	0.967573962536718	0.947434678658975	0.846202718946721	0.942993752335413	0.915687109955967	0.938898568264261	0.953238794112848
486	0.942120113053714	0.976064084650954	0.967803862883191	0.948226483170729	0.846566782010119	0.943618297642589	0.916353506371491	0.940278357370646	0.954835671237559
487	0.943518428729553	0.976338220006302	0.967911156462225	0.948648643076677	0.847007582897777	0.944443921837321	0.91727238483809	0.942167454065839	0.95680514407452
488	0.944505854275888	0.97651829998818	0.967875465909897	0.949111932802785	0.84711725900506	0.945287983248963	0.9183360538657	0.944063411375662	0.958577174342265
489	0.945417032514184	0.97636029306643	0.967890759066734	0.94980070265686	0.846762602440242	0.946186913500213	0.919326098512327	0.945939187864048	0.960341642395907
490	0.945599403449096	0.975993059238192	0.967821437119019	0.951405968153254	0.845954368318895	0.947087891279811	0.920280566954657	0.947401548962398	0.962002026648566
491	0.945731623021651	0.975442894810805	0.96765113808721	0.952513804935125	0.845233100782855	0.947654329041815	0.921445866869368	0.948068687005878	0.962776541735404
492	0.945710594214525	0.974412828120746	0.967139509020673	0.953399218324632	0.844206116594582	0.948127258285072	0.922546853992327	0.948521339666093	0.962853459069256
493	0.945544123111433	0.97344529719611	0.966755877323453	0.954004921596317	0.842945881074474	0.948580582728248	0.923507579060796	0.949067268062116	0.963562576760601
494	0.945191303509287	0.972675630418749	0.967099211806267	0.954363428717617	0.841380144900401	0.948833611276039	0.924107844952959	0.949610548181087	0.964012345137388
495	0.944730772704407	0.972186473768699	0.967810223787738	0.955170464208347	0.839491679385373	0.949177737804128	0.924705250977344	0.95000385484682	0.964887444026476
496	0.944176368773316	0.972005359647115	0.968604770838419	0.955923859234272	0.837297702561758	0.949396975611587	0.925366716145157	0.949998746163949	0.965717422752679
497	0.943504592118355	0.971768567477454	0.969159717697051	0.956973124191906	0.834990723047664	0.949791184367413	0.926132268105787	0.949704293071614	0.966176385795364
498	0.942822288144032	0.971975193081873	0.970122281094244	0.958268597872256	0.833390178219914	0.950116838770677	0.926701712552136	0.948899714073751	0.965681684858465
499	0.942451740402105	0.972595784596148	0.97116173528501	0.95981156816788	0.832289186696702	0.950556329694566	0.927074937017494	0.94788173597088	0.965288516703523
500	0.942075334748077	0.973346363477459	0.972012540425848	0.961278070742232	0.830892385867839	0.950969615283366	0.927323936263164	0.94696987079473	0.965096252420501
501	0.942016307111758	0.974262527284281	0.972874307338015	0.962279207011069	0.829495163939214	0.951624908504205	0.927604848511707	0.946208014850772	0.964955961442255
502	0.941745534744717	0.975379393498918	0.973778165675705	0.96316923016958	0.82790059417567	0.952461284980772	0.927690550684414	0.946009358419785	0.965347546807282
503	0.941461382906268	0.976820558610613	0.974959383111594	0.963725179769763	0.826731611224445	0.953261095316369	0.927766007007952	0.945586011388143	0.9657259421906
504	0.941486547323392	0.978014112298272	0.975982641496639	0.964554488162875	0.82608841495489	0.954044260495449	0.928114158380287	0.944956128847703	0.965852348433643
505	0.94175640993243	0.978625957504833	0.976155569892144	0.965549621716511	0.826233513648148	0.954937710244404	0.928809579411342	0.944284262685096	0.966113686156136
506	0.942200479015838	0.978997933639455	0.975678787217447	0.966113760946327	0.826842155925661	0.955834804669513	0.929698870098665	0.943292708577566	0.966447314492639
507	0.942613089605322	0.979320580216002	0.974967528778405	0.966633563598425	0.828400292851239	0.956644264889372	0.930537874688033	0.942504626120337	0.966917240424408
508	0.94308100895979	0.979381419857646	0.974294080678768	0.967016534861152	0.830107290439915	0.957430740562727	0.931422795533335	0.942033700246961	0.967214824256867
509	0.943677881089428	0.979042933215715	0.973202029103798	0.967215761988964	0.831170805859983	0.958230178869339	0.93241018043749	0.941731510907165	0.96846324110521
510	0.944404660340009	0.978404145441011	0.972197942598068	0.967158577982622	0.832247853377844	0.958894491659102	0.933106887095386	0.941692340119868	0.969011675759863
511	0.945334303986305	0.977909261848303	0.971306502540834	0.967092317571463	0.834059879317341	0.95947651348976	0.934244853448517	0.941667589742244	0.969236624145799
512	0.946316810517592	0.977434996358589	0.97037292368783	0.967029812914021	0.836571249533658	0.959878718050334	0.935396508606965	0.941714099116755	0.96960854719403
513	0.947404909013677	0.976822202820822	0.969203660089796	0.967173245154598	0.839824669612678	0.960199403732733	0.936573776337268	0.94166226705174	0.969342819306326
514	0.948486360540639	0.975866248315884	0.967751622760101	0.967910086482464	0.843411873849857	0.960755909045603	0.937374335673605	0.941827921837346	0.968816572308477
515	0.949310684948579	0.975062376429215	0.966630315221602	0.968124043671558	0.846835357028274	0.961497896709302	0.937770192657165	0.94225817074149	0.967504634439483
516	0.949890177359423	0.974723326162272	0.966271665706808	0.968164149755164	0.849703018868947	0.962340417636427	0.937981861302503	0.942812444411725	0.965415536781575
517	0.950555891467437	0.974452435923955	0.966346998714255	0.968173155751717	0.851926041465085	0.963080039856101	0.937644141543933	0.943967115781861	0.962919432936987
518	0.951359152695894	0.974114689808482	0.966273421962933	0.967967247873252	0.852957306691683	0.963808039632641	0.937337018981445	0.945045347190799	0.96070827119608
519	0.952033526084049	0.973808984732108	0.966345960220267	0.967452472421144	0.853798769735874	0.964515416521992	0.936712402895614	0.945894810942748	0.959060804940554
520	0.952610934006113	0.973901322140099	0.966732934778739	0.967016404112426	0.854878912884522	0.965247108283567	0.935908962445074	0.946975953864154	0.957178602294065
521	0.953106785702821	0.974154102084611	0.967107202268324	0.966756609802038	0.855862946651205	0.966069663373393	0.935471529984343	0.947594911698214	0.955935251935495
522	0.953427545449701	0.974429386274093	0.967360862147199	0.9662609045132	0.856739433055872	0.967006300990021	0.934669948677383	0.947807811189868	0.954292034906428
523	0.953739450441975	0.974442850942405	0.967826089393858	0.966063553205823	0.857681030588773	0.96788449889274	0.933645228826592	0.948121090030696	0.952510908973088
524	0.954028407845762	0.974584533708253	0.968687813013483	0.966341398277746	0.858474385830299	0.96872505785013	0.932486359142734	0.948690069136925	0.95218903637222
525	0.954062104319251	0.974940334044245	0.969929731719662	0.966496683104929	0.859284816477535	0.969337588003492	0.932008753114015	0.949343981519276	0.952612383912171
526	0.954255626489724	0.975614977361465	0.970803158718157	0.967003973950648	0.860059716336972	0.969785811765566	0.931831564234597	0.949782028301471	0.953764441036907
527	0.954763283869997	0.976559585312487	0.971108754119211	0.967621818500848	0.861134367147589	0.970004729383838	0.93167591846831	0.950163106042492	0.955994576229011
528	0.954986195954864	0.977512395913362	0.971320560871225	0.968198148302107	0.863235583306787	0.970426098732983	0.931992297780638	0.950420656941214	0.958440363371778
529	0.955176670122029	0.978426392265582	0.97196121491459	0.968939772637765	0.866040445789034	0.97086867192237	0.932327270823999	0.950712688317073	0.959970405133897
530	0.955254281237187	0.979438395040169	0.972569270036587	0.969953263297937	0.868405023388453	0.971131531921209	0.932918658479989	0.951211140510301	0.960982778435082
531	0.955123431751717	0.979825894228629	0.972924368037068	0.97090636870522	0.870391654466271	0.971088522976393	0.933727494782361	0.951505126410965	0.961547416380269
532	0.954693043627482	0.980105971428319	0.973130196466475	0.971642057702884	0.872243006296774	0.970764181365707	0.934459243188119	0.952203269897048	0.961792313011996
533	0.954380658773098	0.980160566697846	0.973583468350864	0.972439938840315	0.873749383337755	0.970379984180937	0.935341288484222	0.953248335606062	0.962131524055323
534	0.953708890912884	0.980537314657282	0.973885564011717	0.97271078412425	0.874313020438852	0.970019341141592	0.936305195774033	0.953947123643394	0.962467084694244
535	0.952903723222966	0.980829813743094	0.973855055401207	0.972291617586638	0.874086928561727	0.969619492286796	0.937214290461597	0.954232700528891	0.961899143360692
536	0.952626427990129	0.981207040260361	0.973502101200488	0.971739923786991	0.872722741525214	0.969166110679281	0.937930125006357	0.954320251797534	0.960608205167665
537	0.952225480766184	0.981108444521016	0.973275348510372	0.971274404069569	0.870828947222413	0.968727267658452	0.938406059846067	0.954508499025974	0.958676034477205
538	0.951701483936806	0.980458320370226	0.973391175969673	0.970613574366467	0.868897360164298	0.968287484137078	0.93888305279095	0.954401398434452	0.955843908398135
539	0.951457545286064	0.979927625506697	0.973693769511565	0.970176471027025	0.866083337687326	0.967658945751915	0.939481771440265	0.95402435457184	0.952934350734301
540	0.951321571674355	0.979581643098081	0.97384523420017	0.969943232445619	0.863187674967995	0.967142071463582	0.939872789323176	0.953713698560318	0.950637923819165
541	0.951758465528912	0.979361688696672	0.973986118612417	0.969893814105505	0.860828863611137	0.966848857498279	0.940203043661212	0.95304083575504	0.948512297021102
542	0.952758584743468	0.980004150687865	0.974374398583062	0.970208567172261	0.858967223120517	0.966706882454526	0.94039803497527	0.952215573981531	0.946576630297494
543	0.954013908042983	0.980467901276223	0.974795606139063	0.970487158918082	0.857519187744551	0.967087795435786	0.940381701595592	0.951251523984961	0.94478739544426
544	0.954784370779385	0.981034157737468	0.975051822070437	0.970686278939233	0.85641282588771	0.96757006750429	0.94016142694896	0.950342647058537	0.943725243777586
545	0.955854256058882	0.981402716312577	0.975158075640867	0.971043043484938	0.855873044277877	0.968029595355403	0.940040035788361	0.9496534529161	0.942862859518687
546	0.957237778714199	0.981868778898249	0.975590443758757	0.971573864191649	0.855698413068017	0.968642311253942	0.940386864200137	0.949023389460036	0.942025625786028
547	0.958300839535936	0.981830356382164	0.976259208688606	0.972273424485394	0.856143783015009	0.969341257826944	0.940268640214315	0.948655911299828	0.94144705141626
548	0.959315923067138	0.982123084538031	0.977106722944581	0.972626750254042	0.856859745515552	0.969991546144014	0.940261870789463	0.947993005181425	0.941372414787596
549	0.959838831789289	0.982647382021925	0.97787213567976	0.972606583583365	0.856784010111955	0.970743363103355	0.940061318927424	0.947910675221826	0.94174961257239
550	0.960109505939494	0.983039354689244	0.978225986822956	0.972000659633977	0.857177099111264	0.971489020446454	0.939287104213952	0.948213514658045	0.942390968748104
551	0.959906944616885	0.98314156812122	0.978474641969393	0.970961124204802	0.857978127557643	0.972087511216438	0.93898780198974	0.9487270176	0.943213367555313
552	0.959178781327456	0.983052941064757	0.978857565384825	0.96922390459998	0.858929720540455	0.972545288302553	0.93865751832365	0.949651076365268	0.94415421002758
553	0.957554981473358	0.982047386734088	0.979265493448555	0.966954685718859	0.858949358795573	0.972936090101408	0.938690931545732	0.950420646605071	0.945337343606763
554	0.955769463847059	0.981175951462245	0.979983619492113	0.964776616813978	0.858847534849556	0.972825792453255	0.939163627752226	0.951558972976351	0.946396271769211
555	0.954771878579043	0.98058698542008	0.980691292040517	0.962877248098508	0.858753393887685	0.972674492766076	0.939885658116113	0.952555618197283	0.946977379730985
556	0.954007921091964	0.979759495238482	0.981641828887084	0.961024257904992	0.858572498787234	0.972654866939826	0.940421443607646	0.953399487280166	0.947089582215936
557	0.952929712299411	0.978479118814124	0.982246334957769	0.959118232080084	0.858492299641843	0.972592358451933	0.940665224204785	0.954391616898814	0.947321191301469
558	0.951860342257314	0.977669734476718	0.982817526322909	0.956844903614554	0.858457841962931	0.972775952778932	0.941617784292093	0.955272947574619	0.947970112987177
559	0.950950688375607	0.976472045829342	0.983231072465093	0.954579388843538	0.858695080886117	0.972765417953317	0.942673611771899	0.956565631878177	0.949094017359277
560	0.95065580829976	0.975363250388026	0.983677429905254	0.953318847573838	0.85966948719097	0.972651795184728	0.943717878132929	0.957460871622757	0.950219436398924
561	0.95032467069303	0.974483654700248	0.984341887465079	0.952894935459932	0.860308504353221	0.97259721087124	0.945312417635987	0.957887275270406	0.950981201496633
562	0.950386845544052	0.973932481461265	0.984949885611195	0.95281482230721	0.860240597442916	0.972778921169383	0.946472417903565	0.957972222460566	0.951697363421378
563	0.950792092505652	0.973605442303123	0.985037099171197	0.953470090129182	0.859435600457949	0.973055880350025	0.947623934967847	0.957654623774718	0.952726511856185
564	0.952076757838295	0.973865007204373	0.984776890816153	0.953884404765416	0.859290516625559	0.973664732353571	0.948185827680739	0.957875489848257	0.953970292740415
565	0.953792944878673	0.974314288700376	0.984303576876122	0.954413054841542	0.859016636121686	0.974432283573731	0.948491823688927	0.957591767637778	0.955707931462309
566	0.955466408711944	0.974380055859931	0.984290445646146	0.955337147291191	0.85819392225992	0.975015833526413	0.948953595271918	0.957449494544497	0.957702600182568
567	0.957091486230609	0.974646437323434	0.984422332507533	0.956296207103034	0.857008850155169	0.975459057770101	0.949791285686663	0.95769841065622	0.960843651616977
568	0.959124699459779	0.975437133172389	0.984799986871126	0.957120984689379	0.855720201165988	0.975931406117568	0.950652596864871	0.95776668627786	0.964191523581822
569	0.96143589387011	0.976083197992432	0.984991052955035	0.957827739034236	0.854830071887735	0.975906490737955	0.95097179248644	0.957727281026334	0.967504991520261
570	0.963848736927855	0.977442145365761	0.985276335500532	0.958797590402409	0.853928895379662	0.976136710258543	0.951242976298882	0.957449090010404	0.970483964504681
571	0.966158162354987	0.978635702001693	0.98528608456063	0.95921627232148	0.852942455653792	0.976667036501141	0.951790089151852	0.957111356850118	0.973960860807344
572	0.968642133229613	0.979422017310382	0.985569194950008	0.959317252411476	0.852400578914567	0.977213254280303	0.952157867740021	0.957081150632963	0.978070775136663
573	0.971205924797691	0.97976185638217	0.986141238683538	0.959700800805431	0.852706125614799	0.977290245551429	0.952833387381077	0.957000666039228	0.981731248486799
574	0.973448253354602	0.979922012111635	0.987252265533798	0.960229769537034	0.854358334182624	0.977355941354246	0.953483498726548	0.957038171494499	0.983799274165149
575	0.975173978037005	0.980082164484761	0.988295960577466	0.961842416395115	0.856672697216	0.977278193687712	0.954222660958254	0.956925519168657	0.9847860644369
576	0.976293349238584	0.980081246606285	0.988783788465259	0.963543167975103	0.858797779067277	0.977384790435735	0.954924311334118	0.956999247867462	0.984751529810844
577	0.976705815864226	0.979955782224091	0.988305917606109	0.964331667123031	0.861478545683404	0.977571047769105	0.955169053075334	0.956752763863337	0.984368840413775
578	0.976834618042976	0.980128729756051	0.987121144820372	0.96513589295003	0.865534222668909	0.977776702668633	0.955446608879246	0.956136860226892	0.982946193503948
579	0.976912149443478	0.980420137153036	0.985592572463201	0.966498408569177	0.870240951670856	0.977837979990221	0.95579867252713	0.955767926028857	0.980812645528137
580	0.976579514005813	0.980824138095956	0.984014373192598	0.968567625050864	0.874881158207005	0.978242775629772	0.956385657149664	0.955348967153536	0.977710659621261
581	0.976073495826457	0.980312407260229	0.982337163591365	0.97043272910902	0.879984040162173	0.97852087909659	0.95667468088565	0.954883617616389	0.974040751291003
582	0.975465862450982	0.980019476085882	0.980983084212	0.972282655461301	0.885603547033895	0.978361048041293	0.956780741941033	0.954752784910241	0.969487074306956
583	0.97482604473174	0.98029836002757	0.979337397306429	0.973738597053032	0.891042055363843	0.978138080993112	0.956447606517011	0.954633978471616	0.964220575329712
584	0.973883540016539	0.981274289402883	0.977404587488351	0.974226162157398	0.895288714791351	0.978381560583147	0.955693042262601	0.954525339219383	0.959316194986347
585	0.97291032281456	0.982086735879102	0.975177903609308	0.973780060558079	0.898111640978109	0.978304993704218	0.955186603747761	0.954718042153487	0.956517840163961
586	0.972120119616196	0.982686632674407	0.973851621551705	0.972315995010442	0.899588459176241	0.977968462634565	0.955142903774593	0.954667889467052	0.954867214014891
587	0.971840138965856	0.983244735072785	0.973335301644312	0.970715294535007	0.901062114700177	0.977314262524889	0.955179132438826	0.954538852632547	0.954325960204781
588	0.972234264880398	0.984177886644193	0.973513958039223	0.970057041816176	0.902402899970937	0.976814047144188	0.955485962893899	0.954871057215448	0.954479306605633
589	0.972553936913595	0.984586324705645	0.973851380588467	0.969859582305039	0.902533450761093	0.976357102400003	0.955139083680834	0.955371013781221	0.954651937919308
590	0.972159934265982	0.984474297861365	0.974494026419154	0.969000045769655	0.902236991553926	0.976087199391453	0.954394164122658	0.95556880627168	0.955561601228948
591	0.972044239266679	0.984284390434835	0.975141863403941	0.967601156059488	0.901836964735798	0.97573666506138	0.95350499450675	0.955888657772807	0.957768046468561
592	0.971998643926997	0.984409247479712	0.975847570251555	0.966322783913323	0.900755430398303	0.975626578936489	0.953177914841271	0.956202937231745	0.960263086776711
593	0.971957637317923	0.984015593486937	0.976513990880489	0.965166112217704	0.898456982238235	0.975792208967174	0.953001898624954	0.956236295243553	0.962829093986965
594	0.971981660026666	0.982680019650068	0.977063004022098	0.964611691379513	0.896076843253256	0.97616832482795	0.953262422582461	0.956097392163422	0.965702209363487
595	0.971977854843454	0.980703725161981	0.977817691738497	0.965112972139904	0.8945806263084	0.976487625372539	0.953906846274717	0.956271727871566	0.969368140089839
596	0.97222963207279	0.97934857688335	0.978620124683934	0.96636136960606	0.894013156482874	0.97714516443787	0.954221271318561	0.955942953695366	0.972028964211353
597	0.972602268787859	0.978243627845112	0.978399448511	0.968354957375314	0.894562797812765	0.978040097447057	0.954382614531082	0.955870141633512	0.973797662949442
598	0.97279503185443	0.977207475540774	0.977645468815321	0.97026826315081	0.89572107861481	0.979160314462105	0.95444532550973	0.95627111691278	0.974944532590172
599	0.972350718196514	0.976246661193019	0.976777636637804	0.971219337149412	0.896607183460753	0.979952711801677	0.954380676941335	0.956920337183334	0.975425040548118
600	0.971647095083314	0.975931271403913	0.976576404832995	0.970993233860519	0.897411891872249	0.980553152160112	0.954793452873757	0.957492407558151	0.976332224071159
601	0.971207517079342	0.975620013426469	0.976373396512321	0.971791450761374	0.897655524093059	0.981049314410298	0.955592763169253	0.958201098746439	0.976999339235645
602	0.970529285729265	0.975403579903329	0.97656439877798	0.973131497731804	0.89776436021425	0.981623257590418	0.956199409574029	0.958699856982247	0.977334221168374
603	0.969412178896142	0.975919315169706	0.976604928334071	0.974500656750049	0.897581114626814	0.981943942245667	0.956315088343836	0.959258195129087	0.978685892647983
604	0.968047806123449	0.977605230019391	0.976416145232922	0.975395945974289	0.898795664136502	0.982167221322198	0.956070055923353	0.959892628885124	0.981151889200777
605	0.966243623592714	0.980244473664534	0.976548526488371	0.975255014114086	0.900303382542514	0.982211069169109	0.955738056897656	0.960563133791006	0.983369478421985
606	0.96460951208172	0.983105688230804	0.976579284351913	0.974673495009182	0.900968800425848	0.982002808790809	0.955170813523637	0.960874284810997	0.984139224105862
607	0.962966292723186	0.985289956552643	0.976491289544683	0.974226300619837	0.901121213754635	0.981845133170161	0.954691190642918	0.961661875220896	0.985252626329788
608	0.961116384327126	0.987139524475741	0.976572854103986	0.973160495460167	0.900707680129992	0.981525831742473	0.95369981689122	0.962150238080087	0.987130586753584
609	0.958824411205911	0.988605605552397	0.97682397770086	0.971808565182648	0.899414249571969	0.981159429635408	0.95263519813604	0.961866445471201	0.989161564401198
610	0.95673893463516	0.989571312042195	0.977050694830395	0.970697671871836	0.898471238931115	0.981131947507226	0.951164949751532	0.960611775280392	0.99084964727139
611	0.955449224716023	0.990306285930988	0.9770817766209	0.970553446212426	0.898192364748891	0.981343552307985	0.949439529039745	0.959374902171268	0.991892323893575
612	0.954748115478587	0.991474315220544	0.97705583134423	0.969344393704033	0.898788893830241	0.981380383385844	0.947853280500966	0.958581611246228	0.992713489337467
613	0.954191560350572	0.992532931613667	0.976796264395495	0.967612475124138	0.899725239966676	0.981197032415726	0.947161291143035	0.958156231605524	0.992626252685308
614	0.954050335803792	0.993074312697153	0.976632984448706	0.965486287144248	0.901946627628836	0.981179042930061	0.946845909392577	0.958127692720802	0.990857147646354
615	0.954058628445456	0.992475543032004	0.976605397957441	0.964492698101508	0.903381139253133	0.981336231416423	0.947202340727237	0.958341655178708	0.987879382935286
616	0.954604951193959	0.991372244353011	0.976141839393541	0.965020104413982	0.904457224922202	0.981613516670896	0.947635084473765	0.95883982551328	0.984590723327285
617	0.955161526305296	0.99034361603903	0.975675233212137	0.965236100384434	0.907166951230825	0.981847061101659	0.948133222741361	0.959820666540323	0.980665187811933
618	0.955606888322431	0.98939244081375	0.975455977357123	0.965020087226092	0.910411976691942	0.981953611676214	0.948813448336414	0.960868998867933	0.976128747344941
619	0.956280150952677	0.988303038492042	0.975453740132706	0.965410230173563	0.913785861462605	0.982470566662984	0.949892086003283	0.962203160322673	0.971361206183481
620	0.957225046276712	0.987919510130898	0.975629004456042	0.966284637630979	0.917961686598794	0.983007884064759	0.951078319934386	0.964410875897339	0.967127011249932
621	0.958357899312245	0.987989756483077	0.975715409169068	0.967503876602047	0.922706462449085	0.983372739697086	0.952728414319979	0.967520864630316	0.964083446356659
622	0.959006590195236	0.987955272070015	0.975276169470446	0.968397497561738	0.92766232148965	0.983636872662255	0.95479404499441	0.970886278859571	0.962003243970715
623	0.959132609707226	0.987733501530247	0.974699431378287	0.969522059801499	0.932427134944324	0.984161773438333	0.956432797635068	0.973379624656879	0.960497220678943
624	0.959210608288954	0.987440924489494	0.974061041895919	0.970659630315704	0.936049225441734	0.984900643239676	0.95740189726552	0.975771762590305	0.959581276350123
625	0.959571951496955	0.986739465032138	0.973487409976154	0.972348329707596	0.937577059433566	0.985617272232169	0.957937338930253	0.977797573982073	0.959176398690542
626	0.960247125223744	0.986071384194407	0.972975439381191	0.972705519034003	0.939122371552543	0.986149393562929	0.957385174562304	0.979551921165876	0.958695456334266
627	0.960485458967867	0.985522994078678	0.973126817619094	0.971880191994799	0.940953708962333	0.986208811624487	0.956553244279321	0.981081987936839	0.959220612810576
628	0.960605003446019	0.984705215500469	0.973358810149398	0.970670184799074	0.941049150907497	0.986544159888023	0.955686925705729	0.981838419945578	0.961411007930016
629	0.960898908493133	0.983792432823972	0.97348391059781	0.968706334516954	0.940872888831786	0.987275316954117	0.95444706392374	0.982199475882741	0.96410552840911
630	0.960954735731329	0.983119428997856	0.973829294539543	0.966397556948663	0.941225288128602	0.98771355341202	0.952728073553498	0.982788430909631	0.967363018494963
631	0.961904166876081	0.981823781676016	0.974013077250527	0.964422159242792	0.941053878690222	0.988152531841378	0.951232203875227	0.983132368140723	0.9702063974848
632	0.963441825097481	0.979945676530704	0.974462701329796	0.962290550802128	0.939566548425691	0.988585648342997	0.950370139756621	0.982798062803102	0.972672460655775
633	0.965486417101726	0.977838972656059	0.975231282641091	0.960324190408618	0.937340743051862	0.989313057872918	0.949677924955217	0.982329692263259	0.974553432534461
634	0.968010040048471	0.975979124310227	0.976167846087053	0.958889991537089	0.93469260066567	0.990115853199797	0.949631816562278	0.982946659495401	0.974907049172339
635	0.970822113688402	0.974016151446531	0.977129617544417	0.957748347612986	0.93288459606075	0.990800074095261	0.949241841839983	0.983943155935512	0.975302659241822
636	0.973138936661758	0.972096536793441	0.978340388141745	0.956988991291186	0.932787839727918	0.991485808874901	0.949045671283138	0.985155751698491	0.976567866708336
637	0.975335406510162	0.970422966793933	0.979489199705423	0.957598189733385	0.932954178265247	0.992299493108083	0.949923397755553	0.986061236481819	0.978027099029508
638	0.978242781272136	0.968849352449927	0.979949317807724	0.959281632868805	0.932817974958972	0.993619759992653	0.951273932340115	0.987087150445027	0.978537883570545
639	0.981599329093898	0.967772847695311	0.979926285702585	0.96220431724181	0.933916560085333	0.994805979161803	0.952847321368924	0.988870746063235	0.978514645319808
640	0.984294335007062	0.96745563317722	0.979779004925297	0.965995061344804	0.934786250386637	0.995360088104284	0.955025011425302	0.990893077222795	0.978060295647733
641	0.98660396341578	0.967599941278489	0.978919645870525	0.969412721720497	0.93470829255422	0.995753068887097	0.958364880696136	0.992364011286536	0.976403641892242
642	0.987377954935868	0.968335869765692	0.977906689150172	0.972025776496776	0.935522345923981	0.996017550003575	0.961458810264018	0.993154973134117	0.974129915256163
643	0.986972104320504	0.969767217301116	0.976815025579384	0.974783524682892	0.93727591611328	0.996547974648644	0.96361399657324	0.993894290842896	0.971287251062517
644	0.985767546968907	0.971566716975125	0.975697324096775	0.977239991949851	0.939106181425836	0.996645124885564	0.96492267905604	0.994968949855688	0.968040282158604
645	0.984014457028148	0.97314278452237	0.97455817731363	0.979009614843498	0.941225489278559	0.996590749109622	0.9653788982519	0.995172547746632	0.966111060671906
646	0.981449201823793	0.975117499573827	0.973553691051445	0.980290741608774	0.943292844801593	0.996645014119705	0.966006377265827	0.994354986896267	0.964323487482923
647	0.978764600881333	0.978026481779447	0.972492436679439	0.980742493826699	0.944439749587215	0.996332875634997	0.966999926394031	0.99279958418589	0.961834107330634
648	0.975835691181252	0.981441943590563	0.972060846716552	0.979755092064435	0.945082782498438	0.995870474305561	0.967580182242946	0.991484207775795	0.960214837580686
649	0.972631478065259	0.984507792554339	0.971891904610661	0.977657816233208	0.9456107613437	0.995327401831037	0.967993797212731	0.989626496714781	0.959585133736435
650	0.968951489495558	0.986974129023489	0.972210964872976	0.975086136983964	0.945311335048213	0.99490695775949	0.96851455638668	0.987217784710489	0.959056337278972
651	0.965919604334142	0.988490577063298	0.972776962353648	0.973150250478724	0.945002314591077	0.994298199112135	0.968412490934331	0.98475447985144	0.958788057706927
652	0.963503699630208	0.989405592543519	0.97439337461076	0.972105784603513	0.945198843325835	0.993608043033758	0.967223849042504	0.982532308982619	0.958966649020075
653	0.961970660486082	0.990067703734902	0.976747477481557	0.971502717601136	0.943490868672346	0.99268904931668	0.96657888081755	0.9804313115622	0.959453592821644
654	0.961179608062092	0.99069408119639	0.979264771447033	0.971071557394197	0.940829845860267	0.991253632112335	0.966297498952257	0.978894132431904	0.959684968022568
655	0.961086432387245	0.991415089643279	0.982054848364225	0.971575122824822	0.937857129134457	0.990003420890851	0.96624463893532	0.976255013961966	0.960192530995715
656	0.961325854063687	0.991891894787435	0.984802261662781	0.972727631413743	0.934612650217837	0.988559912059689	0.966504423009788	0.973455504598485	0.960831637314372
657	0.96243903738784	0.992128371920416	0.987111822026709	0.974327345903897	0.931760136271869	0.987008308912636	0.967277893453765	0.971449931406996	0.96136598722325
658	0.964205850361694	0.991043169895642	0.988938638909406	0.975977350799714	0.930299641063954	0.986152204173007	0.967510933658584	0.970213148507218	0.961855354163304
659	0.966104735170698	0.988926919117898	0.989750372180535	0.978444040184227	0.929789111345171	0.985445159076605	0.967780964751001	0.969403053631525	0.961600356822831
660	0.967428776525752	0.987331520623207	0.990753941137614	0.981851165742693	0.929808715457065	0.984698600762159	0.96809284544592	0.968946813449461	0.960246675921355
661	0.968745695334839	0.986303413620409	0.992130986994587	0.985260440746671	0.930284523118785	0.983879066922573	0.967871774402364	0.968797938476401	0.95900528187962
662	0.96989208538803	0.985806920798046	0.993607094039415	0.987618441992236	0.931345260523456	0.983879926934942	0.967545870817342	0.968317573141265	0.958731408275512
663	0.970743941815847	0.985530065722603	0.994479174801794	0.988655156568968	0.932751121093141	0.984493210455943	0.967282071247769	0.96779746487415	0.959190787064067
664	0.971642459870709	0.984929560031681	0.994718713017769	0.98938210276676	0.93579409698663	0.985721043651796	0.965931040840581	0.967962553014432	0.960277452367395
665	0.972298172421056	0.983573365055133	0.994394561671003	0.989513465329436	0.940043546716432	0.987319950801282	0.964242474118137	0.968199333633434	0.962004982594001
666	0.972523959568221	0.981240755712459	0.993739294399732	0.988386679656293	0.944760267796121	0.989004681810911	0.962990522343303	0.969138299302778	0.963362864478343
667	0.972778975101565	0.97891516015684	0.993383789212499	0.986383194180908	0.94953949053438	0.990777652755723	0.96205181295217	0.970625458062515	0.964115170535931
668	0.973028877571647	0.976818664623579	0.9938340973313	0.984570156956754	0.954231938901038	0.992368828793088	0.961152147412395	0.971905698081093	0.96451098997684
669	0.97308656041659	0.975682585232567	0.99449333232134	0.982704610930007	0.958139878156147	0.993386141760037	0.960837067919409	0.972701037483824	0.964749610656818
670	0.973504761556222	0.975236295991629	0.99524375372193	0.980473655488682	0.961449981698229	0.994157926178824	0.960615458106755	0.973005641617615	0.964579584867954
671	0.974311642127362	0.974437463580711	0.995488428287259	0.977771739483525	0.964940067747181	0.994661419665447	0.960297102950697	0.973757229222097	0.965342254069548
672	0.975462683878306	0.973051939645835	0.994868435961586	0.975249282872287	0.968157581104197	0.995060664059934	0.960239779203982	0.9744858635668	0.966666346199021
673	0.97673483103666	0.971548989917628	0.993753196712069	0.973516752083751	0.971289918161105	0.99491913321503	0.961007770351439	0.976001261960054	0.967030572348698
674	0.978420592746671	0.97002683314678	0.991924945103002	0.973569665841015	0.973994787617185	0.994151912442144	0.962519851761722	0.977558670213377	0.966805196780328
675	0.980408044254228	0.968554616444882	0.989534879398242	0.974558438117621	0.976280718028279	0.992917206170079	0.964827254393148	0.978510958077246	0.966158485071406
676	0.982796663370733	0.96801040461011	0.987234173125695	0.975641640259475	0.977704920000698	0.991692277571279	0.967880617652149	0.978809209624439	0.965123140939776
677	0.985469633188543	0.968538568834892	0.984767675855595	0.976378956350698	0.978918147366725	0.990218644127106	0.971141323212229	0.979263572902153	0.965348278874463
678	0.987683734842952	0.96931794095949	0.98156835368573	0.977607732401993	0.980577790221139	0.989041704311014	0.974489203479191	0.97965813304791	0.96607592561705
679	0.988879731767615	0.969372989254707	0.977562391401635	0.978193723795748	0.982095513350532	0.988340146456018	0.977594917212074	0.979995683901169	0.967293196708717
680	0.989351270625719	0.968485223561458	0.973398750472244	0.979289615516596	0.983345829278417	0.987546729389296	0.980618988682129	0.980667779049088	0.969177762549688
681	0.989171497812107	0.967659238377714	0.969837095713748	0.980932398620847	0.984541985116731	0.986998517824675	0.983543886751963	0.981166123110363	0.972366099173434
682	0.989132390230874	0.966735012667041	0.966712680313591	0.982254790910666	0.984594404323396	0.986766885429626	0.986519493740756	0.981148799371002	0.97508841583104
683	0.988859274529665	0.966197087452756	0.964071251759311	0.983022521452038	0.984380447875439	0.986746935253692	0.989568472481228	0.981079636497533	0.976908376332406
684	0.988711934823764	0.965609354425213	0.962079452989204	0.983113658397458	0.983221532430948	0.986852990451702	0.99161479779853	0.980175930160172	0.978039750221698
685	0.9885077656089	0.964923057104013	0.961435901136742	0.982063743161837	0.981655718275438	0.987079772025432	0.993353788575272	0.979753090195831	0.978902441080784
686	0.988088573567569	0.964907653671143	0.961606340142453	0.980128706377888	0.979885570834285	0.987580139046865	0.995145291563737	0.979771832637017	0.979118476796664
687	0.986820561514023	0.964521295158059	0.961855591989528	0.978811639775619	0.978943604301652	0.98795326654233	0.996468012595271	0.979743982795339	0.979591013602928
688	0.985137599305737	0.963351851731509	0.962647675358291	0.979268788751019	0.978899044780855	0.988428753213747	0.996820594457113	0.979088831732312	0.979203664270281
689	0.983898344958971	0.961981153419967	0.964264230055106	0.980341146174001	0.978475151343301	0.988688276822123	0.99617633454291	0.978717039590857	0.977757657367772
690	0.983811948746613	0.961205624581849	0.966182079592424	0.981840666420456	0.977713958091468	0.988569004279842	0.994675849598084	0.978412790596324	0.975488259224312
691	0.984780794070802	0.961320324300789	0.968456707520305	0.983252057562185	0.976366589829139	0.988923530909387	0.992221425779054	0.978561328930644	0.972042893275111
692	0.986073085636591	0.961517972857891	0.97073787141343	0.98445262731605	0.975836839799614	0.98896160141984	0.989395608432791	0.979190488480628	0.966347789948391
693	0.986725674990366	0.962134285213705	0.972352714228451	0.986142506060977	0.97679647694287	0.989149161509417	0.986737397394181	0.978957681088081	0.95884959356828
694	0.985710965574368	0.960458414764284	0.974842558495217	0.987793840166906	0.978831737498094	0.989463470946086	0.982118783496763	0.979399741186829	0.951053820901195
695	0.985253665948756	0.959809507206035	0.975196567144486	0.988787999847579	0.979876267072164	0.989434127076786	0.976147523003876	0.980164318307812	0.944762555704773
696	0.984641942581768	0.959320636253953	0.976269799961477	0.992245765347479	0.982742085947057	0.989521297512755	0.971405788865193	0.979941257948237	0.938283203397841
697	0.985147687120723	0.958351900374461	0.977595851759085	0.995158381848904	0.984352588561408	0.989616486967391	0.964284664019976	0.981050779558245	0.92935459071677
698	0.985055664014733	0.958059763202485	0.977772654847633	0.995616670387752	0.985884109615637	0.990098817272555	0.957142196746818	0.982242994481038	0.918526071606014
699	0.979237693376946	0.954444617269248	0.97610436197779	0.994493920514462	0.991536707432456	0.990932742359421	0.949263981397884	0.980294829136721	0.906826711477687
700	0.978937133916398	0.953161399467866	0.966564378740365	0.986762558722783	0.982945563289112	0.989327348897488	0.928721456394186	0.982758588809601	0.910997277286847
